# Supplementary material for: Population clustering of structural brain aging and its association with brain development
Source: eLife. 2024 Oct 18;13:RP94970. doi: 10.7554/eLife.94970 (PMC11488854; doi:10.7554/eLife.94970)
Supplement: Figure 2—source data 1. — Global (a) and selected regional (b, c) cortical gray matter volume rate of change among participants with brain aging patterns 1 (red) and 2 (blue). [file elife-94970-fig2-data1.xlsx]

## Sheet: Sheet1
Fig. 2 Global (a) and selected regional (b, c) cortical gray matter volume rate of change among participants with brain aging patterns 1 (red) and 2 (blue).
ROI	Brain Aging Pattern	Age	rate of change	lower bounds of the 95% confidence interval	upper bounds of the 95% confidence interval
TGMV	Pattern 1	44	-134.909	-747.475	477.656
TGMV	Pattern 1	44.1	-134.909	-747.475	477.656
TGMV	Pattern 1	44.2	-134.909	-747.475	477.656
TGMV	Pattern 1	44.3	-134.909	-747.475	477.656
TGMV	Pattern 1	44.4	-134.909	-747.475	477.656
TGMV	Pattern 1	44.5	-134.909	-747.475	477.656
TGMV	Pattern 1	44.6	-134.909	-747.475	477.656
TGMV	Pattern 1	44.7	-134.909	-747.475	477.656
TGMV	Pattern 1	44.8	-134.909	-747.475	477.656
TGMV	Pattern 1	44.9	-134.909	-747.475	477.656
TGMV	Pattern 1	45	-134.909	-747.475	477.656
TGMV	Pattern 1	45.1	-135.001	-747.487	477.484
TGMV	Pattern 1	45.2	-135.277	-747.522	476.967
TGMV	Pattern 1	45.3	-135.738	-747.58	476.105
TGMV	Pattern 1	45.4	-136.382	-747.662	474.899
TGMV	Pattern 1	45.5	-137.21	-747.768	473.347
TGMV	Pattern 1	45.6	-138.223	-747.897	471.451
TGMV	Pattern 1	45.7	-139.419	-748.049	469.211
TGMV	Pattern 1	45.8	-140.8	-748.225	466.626
TGMV	Pattern 1	45.9	-142.364	-748.425	463.696
TGMV	Pattern 1	46	-144.113	-748.649	460.422
TGMV	Pattern 1	46.1	-146.046	-748.896	456.804
TGMV	Pattern 1	46.2	-148.163	-749.168	452.842
TGMV	Pattern 1	46.3	-150.464	-749.463	448.535
TGMV	Pattern 1	46.4	-152.949	-749.782	443.884
TGMV	Pattern 1	46.5	-155.618	-750.126	438.89
TGMV	Pattern 1	46.6	-158.471	-750.494	433.551
TGMV	Pattern 1	46.7	-161.509	-750.887	427.869
TGMV	Pattern 1	46.8	-164.73	-751.304	421.844
TGMV	Pattern 1	46.9	-168.136	-751.746	415.475
TGMV	Pattern 1	47	-171.725	-752.213	408.763
TGMV	Pattern 1	47.1	-175.499	-752.705	401.708
TGMV	Pattern 1	47.2	-179.456	-753.223	394.31
TGMV	Pattern 1	47.3	-183.598	-753.767	386.57
TGMV	Pattern 1	47.4	-187.924	-754.336	378.488
TGMV	Pattern 1	47.5	-192.434	-754.932	370.064
TGMV	Pattern 1	47.6	-197.128	-755.554	361.298
TGMV	Pattern 1	47.7	-202.006	-756.203	352.191
TGMV	Pattern 1	47.8	-207.068	-756.879	342.742
TGMV	Pattern 1	47.9	-212.314	-757.582	332.953
TGMV	Pattern 1	48	-217.745	-758.314	322.824
TGMV	Pattern 1	48.1	-223.359	-759.074	312.355
TGMV	Pattern 1	48.2	-229.158	-759.862	301.547
TGMV	Pattern 1	48.3	-235.14	-760.68	290.399
TGMV	Pattern 1	48.4	-241.307	-761.528	278.914
TGMV	Pattern 1	48.5	-247.658	-762.406	267.09
TGMV	Pattern 1	48.6	-254.193	-763.315	254.93
TGMV	Pattern 1	48.7	-260.911	-764.255	242.432
TGMV	Pattern 1	48.8	-267.814	-765.228	229.6
TGMV	Pattern 1	48.9	-274.901	-766.235	216.432
TGMV	Pattern 1	49	-282.173	-767.275	202.93
TGMV	Pattern 1	49.1	-289.628	-768.35	189.095
TGMV	Pattern 1	49.2	-297.267	-769.461	174.927
TGMV	Pattern 1	49.3	-305.09	-770.61	160.429
TGMV	Pattern 1	49.4	-313.098	-771.796	145.601
TGMV	Pattern 1	49.5	-321.289	-773.023	130.444
TGMV	Pattern 1	49.6	-329.665	-774.29	114.96
TGMV	Pattern 1	49.7	-338.225	-775.6	99.1506
TGMV	Pattern 1	49.8	-346.968	-776.954	83.0176
TGMV	Pattern 1	49.9	-355.896	-778.355	66.5626
TGMV	Pattern 1	50	-365.008	-779.804	49.788
TGMV	Pattern 1	50.1	-374.304	-781.304	32.6961
TGMV	Pattern 1	50.2	-383.784	-782.858	15.2894
TGMV	Pattern 1	50.3	-393.448	-784.468	-2.4291
TGMV	Pattern 1	50.4	-403.297	-786.137	-20.4562
TGMV	Pattern 1	50.5	-413.329	-787.87	-38.7884
TGMV	Pattern 1	50.6	-423.545	-789.669	-57.4216
TGMV	Pattern 1	50.7	-433.946	-791.54	-76.3512
TGMV	Pattern 1	50.8	-444.53	-793.489	-95.5722
TGMV	Pattern 1	50.9	-455.299	-795.519	-115.079
TGMV	Pattern 1	51	-466.252	-797.639	-134.865
TGMV	Pattern 1	51.1	-477.389	-799.855	-154.922
TGMV	Pattern 1	51.2	-488.709	-802.175	-175.243
TGMV	Pattern 1	51.3	-500.214	-804.611	-195.818
TGMV	Pattern 1	51.4	-511.903	-807.171	-216.636
TGMV	Pattern 1	51.5	-523.776	-809.869	-237.683
TGMV	Pattern 1	51.6	-535.834	-812.721	-258.947
TGMV	Pattern 1	51.7	-548.075	-815.741	-280.409
TGMV	Pattern 1	51.8	-560.5	-818.951	-302.05
TGMV	Pattern 1	51.9	-573.11	-822.373	-323.847
TGMV	Pattern 1	52	-585.903	-826.033	-345.773
TGMV	Pattern 1	52.1	-598.881	-829.963	-367.798
TGMV	Pattern 1	52.2	-612.042	-834.2	-389.885
TGMV	Pattern 1	52.3	-625.388	-838.786	-411.99
TGMV	Pattern 1	52.4	-638.918	-843.772	-434.064
TGMV	Pattern 1	52.5	-652.489	-849.189	-455.789
TGMV	Pattern 1	52.6	-665.959	-855.045	-476.872
TGMV	Pattern 1	52.7	-679.327	-861.358	-497.297
TGMV	Pattern 1	52.8	-692.594	-868.142	-517.046
TGMV	Pattern 1	52.9	-705.76	-875.415	-536.105
TGMV	Pattern 1	53	-718.824	-883.186	-554.462
TGMV	Pattern 1	53.1	-731.787	-891.464	-572.11
TGMV	Pattern 1	53.2	-744.648	-900.253	-589.044
TGMV	Pattern 1	53.3	-757.409	-909.55	-605.267
TGMV	Pattern 1	53.4	-770.067	-919.346	-620.788
TGMV	Pattern 1	53.5	-782.624	-929.626	-635.623
TGMV	Pattern 1	53.6	-795.08	-940.367	-649.794
TGMV	Pattern 1	53.7	-807.435	-951.542	-663.328
TGMV	Pattern 1	53.8	-819.688	-963.115	-676.261
TGMV	Pattern 1	53.9	-831.84	-975.048	-688.631
TGMV	Pattern 1	54	-843.89	-987.299	-700.481
TGMV	Pattern 1	54.1	-855.839	-999.824	-711.855
TGMV	Pattern 1	54.2	-867.687	-1012.58	-722.798
TGMV	Pattern 1	54.3	-879.433	-1025.51	-733.357
TGMV	Pattern 1	54.4	-891.078	-1038.58	-743.576
TGMV	Pattern 1	54.5	-902.621	-1051.75	-753.496
TGMV	Pattern 1	54.6	-914.063	-1064.97	-763.16
TGMV	Pattern 1	54.7	-925.404	-1078.2	-772.603
TGMV	Pattern 1	54.8	-936.643	-1091.42	-781.862
TGMV	Pattern 1	54.9	-947.781	-1104.6	-790.967
TGMV	Pattern 1	55	-958.818	-1117.69	-799.948
TGMV	Pattern 1	55.1	-969.753	-1130.67	-808.831
TGMV	Pattern 1	55.2	-980.586	-1143.53	-817.64
TGMV	Pattern 1	55.3	-991.319	-1156.24	-826.396
TGMV	Pattern 1	55.4	-1001.95	-1168.78	-835.117
TGMV	Pattern 1	55.5	-1012.48	-1181.14	-843.822
TGMV	Pattern 1	55.6	-1022.91	-1193.29	-852.524
TGMV	Pattern 1	55.7	-1033.23	-1205.23	-861.238
TGMV	Pattern 1	55.8	-1043.46	-1216.94	-869.975
TGMV	Pattern 1	55.9	-1053.58	-1228.42	-878.745
TGMV	Pattern 1	56	-1063.61	-1239.65	-887.559
TGMV	Pattern 1	56.1	-1073.53	-1250.63	-896.425
TGMV	Pattern 1	56.2	-1083.35	-1261.35	-905.35
TGMV	Pattern 1	56.3	-1093.07	-1271.79	-914.339
TGMV	Pattern 1	56.4	-1102.68	-1281.97	-923.4
TGMV	Pattern 1	56.5	-1112.2	-1291.86	-932.536
TGMV	Pattern 1	56.6	-1121.61	-1301.47	-941.752
TGMV	Pattern 1	56.7	-1130.93	-1310.8	-951.051
TGMV	Pattern 1	56.8	-1140.14	-1319.84	-960.437
TGMV	Pattern 1	56.9	-1149.25	-1328.58	-969.91
TGMV	Pattern 1	57	-1158.26	-1337.04	-979.474
TGMV	Pattern 1	57.1	-1167.16	-1345.2	-989.13
TGMV	Pattern 1	57.2	-1175.97	-1353.06	-998.878
TGMV	Pattern 1	57.3	-1184.67	-1360.63	-1008.72
TGMV	Pattern 1	57.4	-1193.28	-1367.91	-1018.65
TGMV	Pattern 1	57.5	-1201.78	-1374.89	-1028.67
TGMV	Pattern 1	57.6	-1210.18	-1381.57	-1038.79
TGMV	Pattern 1	57.7	-1218.48	-1387.97	-1048.99
TGMV	Pattern 1	57.8	-1226.68	-1394.08	-1059.27
TGMV	Pattern 1	57.9	-1234.77	-1399.91	-1069.63
TGMV	Pattern 1	58	-1242.77	-1405.46	-1080.07
TGMV	Pattern 1	58.1	-1250.66	-1410.74	-1090.59
TGMV	Pattern 1	58.2	-1258.45	-1415.75	-1101.16
TGMV	Pattern 1	58.3	-1266.14	-1420.5	-1111.79
TGMV	Pattern 1	58.4	-1273.73	-1425	-1122.47
TGMV	Pattern 1	58.5	-1281.22	-1429.26	-1133.18
TGMV	Pattern 1	58.6	-1288.61	-1433.3	-1143.92
TGMV	Pattern 1	58.7	-1295.89	-1437.13	-1154.66
TGMV	Pattern 1	58.8	-1303.08	-1440.76	-1165.39
TGMV	Pattern 1	58.9	-1310.16	-1444.23	-1176.09
TGMV	Pattern 1	59	-1317.14	-1447.56	-1186.72
TGMV	Pattern 1	59.1	-1324.02	-1450.77	-1197.27
TGMV	Pattern 1	59.2	-1330.8	-1453.9	-1207.7
TGMV	Pattern 1	59.3	-1337.48	-1457	-1217.95
TGMV	Pattern 1	59.4	-1344.05	-1460.11	-1228
TGMV	Pattern 1	59.5	-1350.53	-1463.28	-1237.77
TGMV	Pattern 1	59.6	-1356.9	-1466.59	-1247.21
TGMV	Pattern 1	59.7	-1363.17	-1470.1	-1256.24
TGMV	Pattern 1	59.8	-1369.34	-1473.89	-1264.79
TGMV	Pattern 1	59.9	-1375.48	-1478.17	-1272.79
TGMV	Pattern 1	60	-1381.66	-1483.08	-1280.23
TGMV	Pattern 1	60.1	-1387.88	-1488.6	-1287.16
TGMV	Pattern 1	60.2	-1394.14	-1494.69	-1293.59
TGMV	Pattern 1	60.3	-1400.45	-1501.31	-1299.58
TGMV	Pattern 1	60.4	-1406.79	-1508.41	-1305.17
TGMV	Pattern 1	60.5	-1413.17	-1515.94	-1310.4
TGMV	Pattern 1	60.6	-1419.6	-1523.85	-1315.35
TGMV	Pattern 1	60.7	-1426.06	-1532.09	-1320.04
TGMV	Pattern 1	60.8	-1432.57	-1540.6	-1324.54
TGMV	Pattern 1	60.9	-1439.12	-1549.35	-1328.89
TGMV	Pattern 1	61	-1445.71	-1558.28	-1333.13
TGMV	Pattern 1	61.1	-1452.34	-1567.36	-1337.31
TGMV	Pattern 1	61.2	-1459.01	-1576.56	-1341.46
TGMV	Pattern 1	61.3	-1465.72	-1585.84	-1345.6
TGMV	Pattern 1	61.4	-1472.47	-1595.17	-1349.77
TGMV	Pattern 1	61.5	-1479.26	-1604.53	-1353.99
TGMV	Pattern 1	61.6	-1486.09	-1613.91	-1358.28
TGMV	Pattern 1	61.7	-1492.97	-1623.28	-1362.66
TGMV	Pattern 1	61.8	-1499.88	-1632.62	-1367.15
TGMV	Pattern 1	61.9	-1506.84	-1641.92	-1371.75
TGMV	Pattern 1	62	-1513.83	-1651.18	-1376.49
TGMV	Pattern 1	62.1	-1520.87	-1660.37	-1381.37
TGMV	Pattern 1	62.2	-1527.95	-1669.49	-1386.41
TGMV	Pattern 1	62.3	-1535.07	-1678.53	-1391.61
TGMV	Pattern 1	62.4	-1542.23	-1687.49	-1396.97
TGMV	Pattern 1	62.5	-1549.43	-1696.35	-1402.51
TGMV	Pattern 1	62.6	-1556.67	-1705.12	-1408.22
TGMV	Pattern 1	62.7	-1563.95	-1713.78	-1414.12
TGMV	Pattern 1	62.8	-1571.27	-1722.34	-1420.21
TGMV	Pattern 1	62.9	-1578.64	-1730.78	-1426.49
TGMV	Pattern 1	63	-1586.04	-1739.12	-1432.96
TGMV	Pattern 1	63.1	-1593.49	-1747.34	-1439.63
TGMV	Pattern 1	63.2	-1600.97	-1755.44	-1446.5
TGMV	Pattern 1	63.3	-1608.5	-1763.43	-1453.57
TGMV	Pattern 1	63.4	-1616.07	-1771.3	-1460.84
TGMV	Pattern 1	63.5	-1623.67	-1779.04	-1468.31
TGMV	Pattern 1	63.6	-1631.32	-1786.67	-1475.98
TGMV	Pattern 1	63.7	-1639.01	-1794.18	-1483.85
TGMV	Pattern 1	63.8	-1646.74	-1801.56	-1491.93
TGMV	Pattern 1	63.9	-1654.52	-1808.83	-1500.2
TGMV	Pattern 1	64	-1662.33	-1815.98	-1508.68
TGMV	Pattern 1	64.1	-1670.18	-1823.01	-1517.35
TGMV	Pattern 1	64.2	-1678.07	-1829.93	-1526.22
TGMV	Pattern 1	64.3	-1686.01	-1836.73	-1535.29
TGMV	Pattern 1	64.4	-1693.98	-1843.42	-1544.54
TGMV	Pattern 1	64.5	-1702	-1850.01	-1553.99
TGMV	Pattern 1	64.6	-1710.06	-1856.49	-1563.62
TGMV	Pattern 1	64.7	-1718.15	-1862.88	-1573.43
TGMV	Pattern 1	64.8	-1726.29	-1869.17	-1583.41
TGMV	Pattern 1	64.9	-1734.47	-1875.38	-1593.56
TGMV	Pattern 1	65	-1742.69	-1881.51	-1603.88
TGMV	Pattern 1	65.1	-1750.95	-1887.56	-1614.35
TGMV	Pattern 1	65.2	-1759.26	-1893.55	-1624.96
TGMV	Pattern 1	65.3	-1767.6	-1899.49	-1635.7
TGMV	Pattern 1	65.4	-1775.98	-1905.4	-1646.57
TGMV	Pattern 1	65.5	-1784.4	-1911.27	-1657.54
TGMV	Pattern 1	65.6	-1792.87	-1917.14	-1668.6
TGMV	Pattern 1	65.7	-1801.38	-1923.01	-1679.74
TGMV	Pattern 1	65.8	-1809.92	-1928.92	-1690.92
TGMV	Pattern 1	65.9	-1818.51	-1934.88	-1702.13
TGMV	Pattern 1	66	-1827.14	-1940.93	-1713.34
TGMV	Pattern 1	66.1	-1835.81	-1947.09	-1724.52
TGMV	Pattern 1	66.2	-1844.52	-1953.4	-1735.63
TGMV	Pattern 1	66.3	-1853.27	-1959.91	-1746.63
TGMV	Pattern 1	66.4	-1862.06	-1966.64	-1757.47
TGMV	Pattern 1	66.5	-1870.89	-1973.66	-1768.12
TGMV	Pattern 1	66.6	-1879.76	-1981.02	-1778.51
TGMV	Pattern 1	66.7	-1888.68	-1988.75	-1788.6
TGMV	Pattern 1	66.8	-1897.63	-1996.93	-1798.33
TGMV	Pattern 1	66.9	-1906.63	-2005.61	-1807.65
TGMV	Pattern 1	67	-1915.66	-2014.82	-1816.5
TGMV	Pattern 1	67.1	-1924.74	-2024.62	-1824.86
TGMV	Pattern 1	67.2	-1933.86	-2035.03	-1832.68
TGMV	Pattern 1	67.3	-1943	-2046.01	-1839.99
TGMV	Pattern 1	67.4	-1952.15	-2057.43	-1846.88
TGMV	Pattern 1	67.5	-1961.32	-2069.21	-1853.43
TGMV	Pattern 1	67.6	-1970.5	-2081.28	-1859.72
TGMV	Pattern 1	67.7	-1979.69	-2093.59	-1865.79
TGMV	Pattern 1	67.8	-1988.89	-2106.06	-1871.73
TGMV	Pattern 1	67.9	-1998.11	-2118.66	-1877.56
TGMV	Pattern 1	68	-2007.33	-2131.33	-1883.34
TGMV	Pattern 1	68.1	-2016.57	-2144.03	-1889.11
TGMV	Pattern 1	68.2	-2025.82	-2156.75	-1894.89
TGMV	Pattern 1	68.3	-2035.08	-2169.44	-1900.72
TGMV	Pattern 1	68.4	-2044.35	-2182.08	-1906.62
TGMV	Pattern 1	68.5	-2053.64	-2194.66	-1912.62
TGMV	Pattern 1	68.6	-2062.93	-2207.15	-1918.72
TGMV	Pattern 1	68.7	-2072.24	-2219.54	-1924.94
TGMV	Pattern 1	68.8	-2081.56	-2231.83	-1931.3
TGMV	Pattern 1	68.9	-2090.89	-2243.98	-1937.8
TGMV	Pattern 1	69	-2100.23	-2256.01	-1944.46
TGMV	Pattern 1	69.1	-2109.59	-2267.9	-1951.28
TGMV	Pattern 1	69.2	-2118.96	-2279.64	-1958.27
TGMV	Pattern 1	69.3	-2128.33	-2291.23	-1965.44
TGMV	Pattern 1	69.4	-2137.72	-2302.66	-1972.78
TGMV	Pattern 1	69.5	-2147.12	-2313.94	-1980.31
TGMV	Pattern 1	69.6	-2156.54	-2325.05	-1988.02
TGMV	Pattern 1	69.7	-2165.96	-2335.99	-1995.93
TGMV	Pattern 1	69.8	-2175.4	-2346.77	-2004.02
TGMV	Pattern 1	69.9	-2184.85	-2357.38	-2012.31
TGMV	Pattern 1	70	-2194.31	-2367.82	-2020.79
TGMV	Pattern 1	70.1	-2203.78	-2378.09	-2029.46
TGMV	Pattern 1	70.2	-2213.26	-2388.2	-2038.32
TGMV	Pattern 1	70.3	-2222.76	-2398.13	-2047.38
TGMV	Pattern 1	70.4	-2232.26	-2407.89	-2056.63
TGMV	Pattern 1	70.5	-2241.78	-2417.49	-2066.07
TGMV	Pattern 1	70.6	-2251.31	-2426.93	-2075.69
TGMV	Pattern 1	70.7	-2260.85	-2436.21	-2085.5
TGMV	Pattern 1	70.8	-2270.41	-2445.32	-2095.49
TGMV	Pattern 1	70.9	-2279.97	-2454.29	-2105.65
TGMV	Pattern 1	71	-2289.55	-2463.1	-2116
TGMV	Pattern 1	71.1	-2299.14	-2471.77	-2126.5
TGMV	Pattern 1	71.2	-2308.74	-2480.3	-2137.18
TGMV	Pattern 1	71.3	-2318.35	-2488.69	-2148
TGMV	Pattern 1	71.4	-2327.97	-2496.96	-2158.98
TGMV	Pattern 1	71.5	-2337.61	-2505.11	-2170.1
TGMV	Pattern 1	71.6	-2347.25	-2513.16	-2181.35
TGMV	Pattern 1	71.7	-2356.91	-2521.11	-2192.72
TGMV	Pattern 1	71.8	-2366.58	-2528.97	-2204.19
TGMV	Pattern 1	71.9	-2376.26	-2536.76	-2215.77
TGMV	Pattern 1	72	-2385.96	-2544.5	-2227.42
TGMV	Pattern 1	72.1	-2395.66	-2552.19	-2239.14
TGMV	Pattern 1	72.2	-2405.38	-2559.86	-2250.9
TGMV	Pattern 1	72.3	-2415.11	-2567.53	-2262.69
TGMV	Pattern 1	72.4	-2424.85	-2575.23	-2274.47
TGMV	Pattern 1	72.5	-2434.6	-2582.97	-2286.23
TGMV	Pattern 1	72.6	-2444.37	-2590.79	-2297.94
TGMV	Pattern 1	72.7	-2454.14	-2598.72	-2309.56
TGMV	Pattern 1	72.8	-2463.93	-2606.79	-2321.07
TGMV	Pattern 1	72.9	-2473.73	-2615.04	-2332.42
TGMV	Pattern 1	73	-2483.54	-2623.51	-2343.57
TGMV	Pattern 1	73.1	-2493.36	-2632.23	-2354.49
TGMV	Pattern 1	73.2	-2503.2	-2641.26	-2365.14
TGMV	Pattern 1	73.3	-2513.04	-2650.63	-2375.46
TGMV	Pattern 1	73.4	-2522.9	-2660.38	-2385.42
TGMV	Pattern 1	73.5	-2532.77	-2670.56	-2394.98
TGMV	Pattern 1	73.6	-2542.65	-2681.21	-2404.1
TGMV	Pattern 1	73.7	-2552.54	-2692.35	-2412.73
TGMV	Pattern 1	73.8	-2562.45	-2704.03	-2420.87
TGMV	Pattern 1	73.9	-2572.37	-2716.27	-2428.46
TGMV	Pattern 1	74	-2582.29	-2729.07	-2435.51
TGMV	Pattern 1	74.1	-2592.23	-2742.46	-2442
TGMV	Pattern 1	74.2	-2602.18	-2756.45	-2447.92
TGMV	Pattern 1	74.3	-2612.15	-2771.02	-2453.27
TGMV	Pattern 1	74.4	-2622.12	-2786.18	-2458.06
TGMV	Pattern 1	74.5	-2632.11	-2801.92	-2462.3
TGMV	Pattern 1	74.6	-2642.11	-2818.22	-2466
TGMV	Pattern 1	74.7	-2652.04	-2834.89	-2469.19
TGMV	Pattern 1	74.8	-2661.84	-2851.72	-2471.97
TGMV	Pattern 1	74.9	-2671.51	-2868.65	-2474.37
TGMV	Pattern 1	75	-2681.04	-2885.62	-2476.46
TGMV	Pattern 1	75.1	-2690.44	-2902.61	-2478.26
TGMV	Pattern 1	75.2	-2699.7	-2919.57	-2479.82
TGMV	Pattern 1	75.3	-2708.82	-2936.47	-2481.17
TGMV	Pattern 1	75.4	-2717.81	-2953.29	-2482.34
TGMV	Pattern 1	75.5	-2726.67	-2970	-2483.34
TGMV	Pattern 1	75.6	-2735.39	-2986.58	-2484.2
TGMV	Pattern 1	75.7	-2743.97	-3003.01	-2484.93
TGMV	Pattern 1	75.8	-2752.42	-3019.29	-2485.55
TGMV	Pattern 1	75.9	-2760.73	-3035.4	-2486.07
TGMV	Pattern 1	76	-2768.91	-3051.32	-2486.51
TGMV	Pattern 1	76.1	-2776.96	-3067.05	-2486.86
TGMV	Pattern 1	76.2	-2784.87	-3082.57	-2487.16
TGMV	Pattern 1	76.3	-2792.64	-3097.89	-2487.39
TGMV	Pattern 1	76.4	-2800.28	-3112.99	-2487.56
TGMV	Pattern 1	76.5	-2807.78	-3127.87	-2487.69
TGMV	Pattern 1	76.6	-2815.15	-3142.52	-2487.78
TGMV	Pattern 1	76.7	-2822.38	-3156.93	-2487.83
TGMV	Pattern 1	76.8	-2829.48	-3171.11	-2487.84
TGMV	Pattern 1	76.9	-2836.44	-3185.05	-2487.83
TGMV	Pattern 1	77	-2843.27	-3198.75	-2487.79
TGMV	Pattern 1	77.1	-2849.96	-3212.19	-2487.72
TGMV	Pattern 1	77.2	-2856.52	-3225.39	-2487.64
TGMV	Pattern 1	77.3	-2862.94	-3238.34	-2487.54
TGMV	Pattern 1	77.4	-2869.22	-3251.03	-2487.42
TGMV	Pattern 1	77.5	-2875.37	-3263.47	-2487.28
TGMV	Pattern 1	77.6	-2881.39	-3275.64	-2487.14
TGMV	Pattern 1	77.7	-2887.27	-3287.56	-2486.98
TGMV	Pattern 1	77.8	-2893.02	-3299.21	-2486.82
TGMV	Pattern 1	77.9	-2898.63	-3310.61	-2486.65
TGMV	Pattern 1	78	-2904.1	-3321.74	-2486.47
TGMV	Pattern 1	78.1	-2909.44	-3332.6	-2486.28
TGMV	Pattern 1	78.2	-2914.65	-3343.2	-2486.1
TGMV	Pattern 1	78.3	-2919.72	-3353.53	-2485.91
TGMV	Pattern 1	78.4	-2924.65	-3363.59	-2485.71
TGMV	Pattern 1	78.5	-2929.45	-3373.38	-2485.52
TGMV	Pattern 1	78.6	-2934.11	-3382.9	-2485.33
TGMV	Pattern 1	78.7	-2938.64	-3392.15	-2485.13
TGMV	Pattern 1	78.8	-2943.04	-3401.14	-2484.94
TGMV	Pattern 1	78.9	-2947.29	-3409.84	-2484.74
TGMV	Pattern 1	79	-2951.42	-3418.28	-2484.55
TGMV	Pattern 1	79.1	-2955.41	-3426.45	-2484.37
TGMV	Pattern 1	79.2	-2959.26	-3434.34	-2484.18
TGMV	Pattern 1	79.3	-2962.98	-3441.95	-2484
TGMV	Pattern 1	79.4	-2966.56	-3449.3	-2483.82
TGMV	Pattern 1	79.5	-2970.01	-3456.37	-2483.65
TGMV	Pattern 1	79.6	-2973.32	-3463.16	-2483.48
TGMV	Pattern 1	79.7	-2976.5	-3469.68	-2483.31
TGMV	Pattern 1	79.8	-2979.54	-3475.92	-2483.15
TGMV	Pattern 1	79.9	-2982.44	-3481.89	-2483
TGMV	Pattern 1	80	-2985.22	-3487.58	-2482.85
TGMV	Pattern 1	80.1	-2987.85	-3492.99	-2482.71
TGMV	Pattern 1	80.2	-2990.35	-3498.13	-2482.57
TGMV	Pattern 1	80.3	-2992.72	-3502.99	-2482.44
TGMV	Pattern 1	80.4	-2994.95	-3507.58	-2482.32
TGMV	Pattern 1	80.5	-2997.04	-3511.89	-2482.2
TGMV	Pattern 1	80.6	-2999	-3515.92	-2482.09
TGMV	Pattern 1	80.7	-3000.83	-3519.67	-2481.99
TGMV	Pattern 1	80.8	-3002.52	-3523.15	-2481.89
TGMV	Pattern 1	80.9	-3004.07	-3526.35	-2481.8
TGMV	Pattern 1	81	-3005.49	-3529.27	-2481.72
TGMV	Pattern 1	81.1	-3006.78	-3531.91	-2481.65
TGMV	Pattern 1	81.2	-3007.93	-3534.27	-2481.58
TGMV	Pattern 1	81.3	-3008.94	-3536.36	-2481.52
TGMV	Pattern 1	81.4	-3009.82	-3538.17	-2481.47
TGMV	Pattern 1	81.5	-3010.56	-3539.7	-2481.43
TGMV	Pattern 1	81.6	-3011.17	-3540.95	-2481.39
TGMV	Pattern 1	81.7	-3011.64	-3541.92	-2481.36
TGMV	Pattern 1	81.8	-3011.98	-3542.62	-2481.35
TGMV	Pattern 1	81.9	-3012.19	-3543.04	-2481.33
TGMV	Pattern 1	82	-3012.25	-3543.18	-2481.33
TGMV	Pattern 2	44	389.666	-314.442	1093.77
TGMV	Pattern 2	44.1	389.542	-314.481	1093.57
TGMV	Pattern 2	44.2	389.171	-314.597	1092.94
TGMV	Pattern 2	44.3	388.552	-314.79	1091.89
TGMV	Pattern 2	44.4	387.685	-315.061	1090.43
TGMV	Pattern 2	44.5	386.571	-315.409	1088.55
TGMV	Pattern 2	44.6	385.21	-315.834	1086.25
TGMV	Pattern 2	44.7	383.6	-316.336	1083.54
TGMV	Pattern 2	44.8	381.744	-316.916	1080.4
TGMV	Pattern 2	44.9	379.639	-317.574	1076.85
TGMV	Pattern 2	45	377.287	-318.309	1072.88
TGMV	Pattern 2	45.1	374.688	-319.122	1068.5
TGMV	Pattern 2	45.2	371.841	-320.012	1063.69
TGMV	Pattern 2	45.3	368.746	-320.981	1058.47
TGMV	Pattern 2	45.4	365.404	-322.027	1052.83
TGMV	Pattern 2	45.5	361.814	-323.151	1046.78
TGMV	Pattern 2	45.6	357.976	-324.353	1040.31
TGMV	Pattern 2	45.7	353.891	-325.633	1033.42
TGMV	Pattern 2	45.8	349.559	-326.992	1026.11
TGMV	Pattern 2	45.9	344.979	-328.429	1018.39
TGMV	Pattern 2	46	340.151	-329.944	1010.25
TGMV	Pattern 2	46.1	335.076	-331.539	1001.69
TGMV	Pattern 2	46.2	329.753	-333.212	992.718
TGMV	Pattern 2	46.3	324.183	-334.964	983.329
TGMV	Pattern 2	46.4	318.365	-336.796	973.525
TGMV	Pattern 2	46.5	312.299	-338.707	963.305
TGMV	Pattern 2	46.6	305.986	-340.698	952.67
TGMV	Pattern 2	46.7	299.425	-342.769	941.619
TGMV	Pattern 2	46.8	292.617	-344.92	930.154
TGMV	Pattern 2	46.9	285.561	-347.152	918.274
TGMV	Pattern 2	47	278.258	-349.464	905.979
TGMV	Pattern 2	47.1	270.707	-351.858	893.271
TGMV	Pattern 2	47.2	262.908	-354.333	880.149
TGMV	Pattern 2	47.3	254.862	-356.89	866.614
TGMV	Pattern 2	47.4	246.568	-359.529	852.666
TGMV	Pattern 2	47.5	238.027	-362.252	838.305
TGMV	Pattern 2	47.6	229.238	-365.057	823.533
TGMV	Pattern 2	47.7	220.202	-367.946	808.349
TGMV	Pattern 2	47.8	210.918	-370.919	792.754
TGMV	Pattern 2	47.9	201.386	-373.977	776.749
TGMV	Pattern 2	48	191.607	-377.121	760.335
TGMV	Pattern 2	48.1	181.58	-380.351	743.511
TGMV	Pattern 2	48.2	171.306	-383.668	726.279
TGMV	Pattern 2	48.3	160.784	-387.072	708.64
TGMV	Pattern 2	48.4	150.014	-390.566	690.594
TGMV	Pattern 2	48.5	138.997	-394.148	672.143
TGMV	Pattern 2	48.6	127.733	-397.822	653.287
TGMV	Pattern 2	48.7	116.221	-401.587	634.028
TGMV	Pattern 2	48.8	104.461	-405.445	614.367
TGMV	Pattern 2	48.9	92.4534	-409.398	594.305
TGMV	Pattern 2	49	80.1986	-413.446	573.844
TGMV	Pattern 2	49.1	67.6961	-417.593	552.985
TGMV	Pattern 2	49.2	54.946	-421.838	531.73
TGMV	Pattern 2	49.3	41.9484	-426.185	510.082
TGMV	Pattern 2	49.4	28.7032	-430.635	488.041
TGMV	Pattern 2	49.5	15.2105	-435.191	465.612
TGMV	Pattern 2	49.6	1.47006	-439.856	442.796
TGMV	Pattern 2	49.7	-12.5178	-444.633	419.597
TGMV	Pattern 2	49.8	-26.7533	-449.524	396.018
TGMV	Pattern 2	49.9	-41.2364	-454.535	372.062
TGMV	Pattern 2	50	-55.967	-459.668	347.734
TGMV	Pattern 2	50.1	-70.9453	-464.929	323.039
TGMV	Pattern 2	50.2	-86.171	-470.323	297.981
TGMV	Pattern 2	50.3	-101.644	-475.856	272.567
TGMV	Pattern 2	50.4	-117.365	-481.535	246.804
TGMV	Pattern 2	50.5	-133.334	-487.367	220.7
TGMV	Pattern 2	50.6	-149.55	-493.362	194.262
TGMV	Pattern 2	50.7	-166.014	-499.53	167.502
TGMV	Pattern 2	50.8	-182.725	-505.881	140.432
TGMV	Pattern 2	50.9	-199.684	-512.431	113.064
TGMV	Pattern 2	51	-216.89	-519.194	85.4135
TGMV	Pattern 2	51.1	-234.344	-526.188	57.4998
TGMV	Pattern 2	51.2	-252.046	-533.434	29.3434
TGMV	Pattern 2	51.3	-269.995	-540.958	0.969244
TGMV	Pattern 2	51.4	-288.191	-548.789	-27.5937
TGMV	Pattern 2	51.5	-306.636	-556.96	-56.3114
TGMV	Pattern 2	51.6	-325.327	-565.511	-85.1433
TGMV	Pattern 2	51.7	-344.096	-574.462	-113.73
TGMV	Pattern 2	51.8	-362.772	-583.81	-141.733
TGMV	Pattern 2	51.9	-381.353	-593.573	-169.134
TGMV	Pattern 2	52	-399.842	-603.768	-195.916
TGMV	Pattern 2	52.1	-418.237	-614.412	-222.062
TGMV	Pattern 2	52.2	-436.538	-625.521	-247.554
TGMV	Pattern 2	52.3	-454.746	-637.112	-272.379
TGMV	Pattern 2	52.4	-472.86	-649.198	-296.522
TGMV	Pattern 2	52.5	-490.881	-661.789	-319.973
TGMV	Pattern 2	52.6	-508.808	-674.892	-342.724
TGMV	Pattern 2	52.7	-526.642	-688.51	-364.773
TGMV	Pattern 2	52.8	-544.382	-702.64	-386.124
TGMV	Pattern 2	52.9	-562.029	-717.272	-406.785
TGMV	Pattern 2	53	-579.582	-732.392	-426.772
TGMV	Pattern 2	53.1	-597.042	-747.978	-446.105
TGMV	Pattern 2	53.2	-614.408	-764.002	-464.813
TGMV	Pattern 2	53.3	-631.68	-780.432	-482.929
TGMV	Pattern 2	53.4	-648.86	-797.229	-500.49
TGMV	Pattern 2	53.5	-665.945	-814.352	-517.538
TGMV	Pattern 2	53.6	-682.937	-831.759	-534.116
TGMV	Pattern 2	53.7	-699.836	-849.404	-550.269
TGMV	Pattern 2	53.8	-716.641	-867.242	-566.04
TGMV	Pattern 2	53.9	-733.353	-885.231	-581.475
TGMV	Pattern 2	54	-749.971	-903.328	-596.614
TGMV	Pattern 2	54.1	-766.496	-921.493	-611.498
TGMV	Pattern 2	54.2	-782.927	-939.688	-626.165
TGMV	Pattern 2	54.3	-799.264	-957.879	-640.65
TGMV	Pattern 2	54.4	-815.508	-976.033	-654.984
TGMV	Pattern 2	54.5	-831.659	-994.121	-669.197
TGMV	Pattern 2	54.6	-847.716	-1012.12	-683.316
TGMV	Pattern 2	54.7	-863.68	-1029.99	-697.364
TGMV	Pattern 2	54.8	-879.55	-1047.73	-711.364
TGMV	Pattern 2	54.9	-895.326	-1065.32	-725.335
TGMV	Pattern 2	55	-911.009	-1082.72	-739.294
TGMV	Pattern 2	55.1	-926.599	-1099.94	-753.258
TGMV	Pattern 2	55.2	-942.095	-1116.95	-767.239
TGMV	Pattern 2	55.3	-957.497	-1133.74	-781.25
TGMV	Pattern 2	55.4	-972.806	-1150.31	-795.303
TGMV	Pattern 2	55.5	-988.021	-1166.64	-809.407
TGMV	Pattern 2	55.6	-1003.14	-1182.72	-823.571
TGMV	Pattern 2	55.7	-1018.17	-1198.54	-837.802
TGMV	Pattern 2	55.8	-1033.11	-1214.11	-852.107
TGMV	Pattern 2	55.9	-1047.95	-1229.4	-866.492
TGMV	Pattern 2	56	-1062.7	-1244.43	-880.961
TGMV	Pattern 2	56.1	-1077.35	-1259.18	-895.521
TGMV	Pattern 2	56.2	-1091.91	-1273.65	-910.173
TGMV	Pattern 2	56.3	-1106.38	-1287.84	-924.921
TGMV	Pattern 2	56.4	-1120.75	-1301.74	-939.768
TGMV	Pattern 2	56.5	-1135.03	-1315.35	-954.716
TGMV	Pattern 2	56.6	-1149.22	-1328.67	-969.765
TGMV	Pattern 2	56.7	-1163.31	-1341.71	-984.916
TGMV	Pattern 2	56.8	-1177.31	-1354.46	-1000.17
TGMV	Pattern 2	56.9	-1191.22	-1366.91	-1015.53
TGMV	Pattern 2	57	-1205.03	-1379.08	-1030.98
TGMV	Pattern 2	57.1	-1218.75	-1390.96	-1046.54
TGMV	Pattern 2	57.2	-1232.38	-1402.56	-1062.2
TGMV	Pattern 2	57.3	-1245.91	-1413.88	-1077.94
TGMV	Pattern 2	57.4	-1259.35	-1424.91	-1093.78
TGMV	Pattern 2	57.5	-1272.69	-1435.68	-1109.71
TGMV	Pattern 2	57.6	-1285.95	-1446.18	-1125.71
TGMV	Pattern 2	57.7	-1299.1	-1456.42	-1141.78
TGMV	Pattern 2	57.8	-1312.17	-1466.42	-1157.92
TGMV	Pattern 2	57.9	-1325.14	-1476.17	-1174.11
TGMV	Pattern 2	58	-1338.02	-1485.69	-1190.34
TGMV	Pattern 2	58.1	-1350.8	-1495	-1206.6
TGMV	Pattern 2	58.2	-1363.49	-1504.12	-1222.87
TGMV	Pattern 2	58.3	-1376.09	-1513.05	-1239.13
TGMV	Pattern 2	58.4	-1388.59	-1521.84	-1255.35
TGMV	Pattern 2	58.5	-1401	-1530.5	-1271.51
TGMV	Pattern 2	58.6	-1413.32	-1539.07	-1287.57
TGMV	Pattern 2	58.7	-1425.54	-1547.59	-1303.49
TGMV	Pattern 2	58.8	-1437.67	-1556.1	-1319.24
TGMV	Pattern 2	58.9	-1449.71	-1564.67	-1334.75
TGMV	Pattern 2	59	-1461.65	-1573.34	-1349.96
TGMV	Pattern 2	59.1	-1473.5	-1582.19	-1364.81
TGMV	Pattern 2	59.2	-1485.26	-1591.3	-1379.21
TGMV	Pattern 2	59.3	-1496.95	-1600.84	-1393.05
TGMV	Pattern 2	59.4	-1508.6	-1610.92	-1406.27
TGMV	Pattern 2	59.5	-1520.21	-1621.54	-1418.88
TGMV	Pattern 2	59.6	-1531.78	-1632.65	-1430.92
TGMV	Pattern 2	59.7	-1543.32	-1644.22	-1442.42
TGMV	Pattern 2	59.8	-1554.82	-1656.21	-1453.42
TGMV	Pattern 2	59.9	-1566.28	-1668.57	-1463.98
TGMV	Pattern 2	60	-1577.7	-1681.26	-1474.13
TGMV	Pattern 2	60.1	-1589.08	-1694.22	-1483.94
TGMV	Pattern 2	60.2	-1600.42	-1707.4	-1493.45
TGMV	Pattern 2	60.3	-1611.73	-1720.76	-1502.7
TGMV	Pattern 2	60.4	-1622.99	-1734.25	-1511.74
TGMV	Pattern 2	60.5	-1634.22	-1747.83	-1520.62
TGMV	Pattern 2	60.6	-1645.41	-1761.47	-1529.36
TGMV	Pattern 2	60.7	-1656.57	-1775.14	-1538
TGMV	Pattern 2	60.8	-1667.68	-1788.8	-1546.56
TGMV	Pattern 2	60.9	-1678.75	-1802.43	-1555.08
TGMV	Pattern 2	61	-1689.79	-1816.01	-1563.57
TGMV	Pattern 2	61.1	-1700.79	-1829.51	-1572.06
TGMV	Pattern 2	61.2	-1711.75	-1842.93	-1580.57
TGMV	Pattern 2	61.3	-1722.67	-1856.24	-1589.09
TGMV	Pattern 2	61.4	-1733.55	-1869.44	-1597.67
TGMV	Pattern 2	61.5	-1744.4	-1882.5	-1606.29
TGMV	Pattern 2	61.6	-1755.2	-1895.43	-1614.97
TGMV	Pattern 2	61.7	-1765.97	-1908.21	-1623.73
TGMV	Pattern 2	61.8	-1776.7	-1920.83	-1632.56
TGMV	Pattern 2	61.9	-1787.39	-1933.29	-1641.48
TGMV	Pattern 2	62	-1798.04	-1945.59	-1650.49
TGMV	Pattern 2	62.1	-1808.65	-1957.71	-1659.6
TGMV	Pattern 2	62.2	-1819.23	-1969.65	-1668.81
TGMV	Pattern 2	62.3	-1829.77	-1981.41	-1678.12
TGMV	Pattern 2	62.4	-1840.27	-1992.99	-1687.54
TGMV	Pattern 2	62.5	-1850.73	-2004.37	-1697.08
TGMV	Pattern 2	62.6	-1861.15	-2015.57	-1706.72
TGMV	Pattern 2	62.7	-1871.53	-2026.58	-1716.48
TGMV	Pattern 2	62.8	-1881.88	-2037.4	-1726.35
TGMV	Pattern 2	62.9	-1892.18	-2048.02	-1736.34
TGMV	Pattern 2	63	-1902.45	-2058.45	-1746.45
TGMV	Pattern 2	63.1	-1912.68	-2068.68	-1756.68
TGMV	Pattern 2	63.2	-1922.87	-2078.72	-1767.02
TGMV	Pattern 2	63.3	-1933.02	-2088.56	-1777.48
TGMV	Pattern 2	63.4	-1943.14	-2098.21	-1788.06
TGMV	Pattern 2	63.5	-1953.21	-2107.67	-1798.76
TGMV	Pattern 2	63.6	-1963.25	-2116.93	-1809.57
TGMV	Pattern 2	63.7	-1973.25	-2126.01	-1820.49
TGMV	Pattern 2	63.8	-1983.21	-2134.89	-1831.53
TGMV	Pattern 2	63.9	-1993.13	-2143.59	-1842.67
TGMV	Pattern 2	64	-2003.02	-2152.11	-1853.92
TGMV	Pattern 2	64.1	-2012.86	-2160.45	-1865.27
TGMV	Pattern 2	64.2	-2022.67	-2168.62	-1876.72
TGMV	Pattern 2	64.3	-2032.44	-2176.61	-1888.26
TGMV	Pattern 2	64.4	-2042.17	-2184.44	-1899.89
TGMV	Pattern 2	64.5	-2051.86	-2192.12	-1911.6
TGMV	Pattern 2	64.6	-2061.51	-2199.64	-1923.38
TGMV	Pattern 2	64.7	-2071.13	-2207.02	-1935.23
TGMV	Pattern 2	64.8	-2080.7	-2214.27	-1947.13
TGMV	Pattern 2	64.9	-2090.24	-2221.4	-1959.08
TGMV	Pattern 2	65	-2099.74	-2228.42	-1971.06
TGMV	Pattern 2	65.1	-2109.2	-2235.35	-1983.05
TGMV	Pattern 2	65.2	-2118.62	-2242.2	-1995.05
TGMV	Pattern 2	65.3	-2128.01	-2249	-2007.02
TGMV	Pattern 2	65.4	-2137.35	-2255.76	-2018.95
TGMV	Pattern 2	65.5	-2146.66	-2262.51	-2030.82
TGMV	Pattern 2	65.6	-2155.93	-2269.27	-2042.59
TGMV	Pattern 2	65.7	-2165.16	-2276.09	-2054.23
TGMV	Pattern 2	65.8	-2174.35	-2283	-2065.71
TGMV	Pattern 2	65.9	-2183.51	-2290.03	-2076.99
TGMV	Pattern 2	66	-2192.62	-2297.23	-2088.02
TGMV	Pattern 2	66.1	-2201.7	-2304.64	-2098.76
TGMV	Pattern 2	66.2	-2210.74	-2312.32	-2109.15
TGMV	Pattern 2	66.3	-2219.74	-2320.32	-2119.15
TGMV	Pattern 2	66.4	-2228.7	-2328.69	-2128.71
TGMV	Pattern 2	66.5	-2237.62	-2337.47	-2137.77
TGMV	Pattern 2	66.6	-2246.51	-2346.71	-2146.3
TGMV	Pattern 2	66.7	-2255.35	-2356.45	-2154.25
TGMV	Pattern 2	66.8	-2264.16	-2366.72	-2161.6
TGMV	Pattern 2	66.9	-2272.93	-2377.47	-2168.39
TGMV	Pattern 2	67	-2281.67	-2388.6	-2174.75
TGMV	Pattern 2	67.1	-2290.38	-2400.03	-2180.73
TGMV	Pattern 2	67.2	-2299.06	-2411.69	-2186.42
TGMV	Pattern 2	67.3	-2307.7	-2423.52	-2191.88
TGMV	Pattern 2	67.4	-2316.31	-2435.46	-2197.15
TGMV	Pattern 2	67.5	-2324.88	-2447.47	-2202.29
TGMV	Pattern 2	67.6	-2333.43	-2459.51	-2207.35
TGMV	Pattern 2	67.7	-2341.94	-2471.53	-2212.34
TGMV	Pattern 2	67.8	-2350.42	-2483.51	-2217.32
TGMV	Pattern 2	67.9	-2358.86	-2495.42	-2222.3
TGMV	Pattern 2	68	-2367.28	-2507.24	-2227.31
TGMV	Pattern 2	68.1	-2375.66	-2518.95	-2232.37
TGMV	Pattern 2	68.2	-2384	-2530.52	-2237.49
TGMV	Pattern 2	68.3	-2392.32	-2541.96	-2242.68
TGMV	Pattern 2	68.4	-2400.6	-2553.24	-2247.97
TGMV	Pattern 2	68.5	-2408.85	-2564.35	-2253.36
TGMV	Pattern 2	68.6	-2417.07	-2575.29	-2258.85
TGMV	Pattern 2	68.7	-2425.26	-2586.05	-2264.46
TGMV	Pattern 2	68.8	-2433.41	-2596.62	-2270.2
TGMV	Pattern 2	68.9	-2441.53	-2607	-2276.06
TGMV	Pattern 2	69	-2449.62	-2617.18	-2282.05
TGMV	Pattern 2	69.1	-2457.67	-2627.16	-2288.17
TGMV	Pattern 2	69.2	-2465.69	-2636.94	-2294.44
TGMV	Pattern 2	69.3	-2473.68	-2646.52	-2300.85
TGMV	Pattern 2	69.4	-2481.64	-2655.88	-2307.39
TGMV	Pattern 2	69.5	-2489.56	-2665.04	-2314.09
TGMV	Pattern 2	69.6	-2497.45	-2673.98	-2320.92
TGMV	Pattern 2	69.7	-2505.31	-2682.72	-2327.9
TGMV	Pattern 2	69.8	-2513.14	-2691.25	-2335.02
TGMV	Pattern 2	69.9	-2520.93	-2699.58	-2342.29
TGMV	Pattern 2	70	-2528.69	-2707.69	-2349.69
TGMV	Pattern 2	70.1	-2536.42	-2715.6	-2357.24
TGMV	Pattern 2	70.2	-2544.11	-2723.31	-2364.92
TGMV	Pattern 2	70.3	-2551.78	-2730.82	-2372.74
TGMV	Pattern 2	70.4	-2559.41	-2738.13	-2380.69
TGMV	Pattern 2	70.5	-2567.01	-2745.25	-2388.76
TGMV	Pattern 2	70.6	-2574.57	-2752.18	-2396.96
TGMV	Pattern 2	70.7	-2582.1	-2758.93	-2405.28
TGMV	Pattern 2	70.8	-2589.6	-2765.5	-2413.71
TGMV	Pattern 2	70.9	-2597.07	-2771.9	-2422.24
TGMV	Pattern 2	71	-2604.5	-2778.13	-2430.88
TGMV	Pattern 2	71.1	-2611.91	-2784.21	-2439.6
TGMV	Pattern 2	71.2	-2619.27	-2790.15	-2448.4
TGMV	Pattern 2	71.3	-2626.61	-2795.94	-2457.28
TGMV	Pattern 2	71.4	-2633.92	-2801.62	-2466.21
TGMV	Pattern 2	71.5	-2641.19	-2807.18	-2475.19
TGMV	Pattern 2	71.6	-2648.43	-2812.64	-2484.21
TGMV	Pattern 2	71.7	-2655.63	-2818.03	-2493.23
TGMV	Pattern 2	71.8	-2662.8	-2823.35	-2502.26
TGMV	Pattern 2	71.9	-2669.95	-2828.63	-2511.26
TGMV	Pattern 2	72	-2677.05	-2833.89	-2520.22
TGMV	Pattern 2	72.1	-2684.13	-2839.15	-2529.11
TGMV	Pattern 2	72.2	-2691.17	-2844.44	-2537.9
TGMV	Pattern 2	72.3	-2698.18	-2849.79	-2546.57
TGMV	Pattern 2	72.4	-2705.16	-2855.23	-2555.09
TGMV	Pattern 2	72.5	-2712.1	-2860.78	-2563.42
TGMV	Pattern 2	72.6	-2719.02	-2866.5	-2571.53
TGMV	Pattern 2	72.7	-2725.9	-2872.41	-2579.38
TGMV	Pattern 2	72.8	-2732.74	-2878.55	-2586.93
TGMV	Pattern 2	72.9	-2739.56	-2884.97	-2594.15
TGMV	Pattern 2	73	-2746.34	-2891.69	-2600.99
TGMV	Pattern 2	73.1	-2753.09	-2898.76	-2607.42
TGMV	Pattern 2	73.2	-2759.8	-2906.21	-2613.4
TGMV	Pattern 2	73.3	-2766.49	-2914.08	-2618.9
TGMV	Pattern 2	73.4	-2773.14	-2922.39	-2623.89
TGMV	Pattern 2	73.5	-2779.76	-2931.17	-2628.34
TGMV	Pattern 2	73.6	-2786.34	-2940.45	-2632.24
TGMV	Pattern 2	73.7	-2792.9	-2950.22	-2635.57
TGMV	Pattern 2	73.8	-2799.42	-2960.51	-2638.32
TGMV	Pattern 2	73.9	-2805.91	-2971.32	-2640.49
TGMV	Pattern 2	74	-2812.36	-2982.64	-2642.08
TGMV	Pattern 2	74.1	-2818.78	-2994.48	-2643.09
TGMV	Pattern 2	74.2	-2825.17	-3006.82	-2643.53
TGMV	Pattern 2	74.3	-2831.53	-3019.65	-2643.41
TGMV	Pattern 2	74.4	-2837.86	-3032.96	-2642.75
TGMV	Pattern 2	74.5	-2844.12	-3046.61	-2641.64
TGMV	Pattern 2	74.6	-2850.31	-3060.41	-2640.2
TGMV	Pattern 2	74.7	-2856.41	-3074.33	-2638.49
TGMV	Pattern 2	74.8	-2862.43	-3088.31	-2636.55
TGMV	Pattern 2	74.9	-2868.36	-3102.32	-2634.41
TGMV	Pattern 2	75	-2874.21	-3116.33	-2632.1
TGMV	Pattern 2	75.1	-2879.98	-3130.32	-2629.65
TGMV	Pattern 2	75.2	-2885.67	-3144.26	-2627.08
TGMV	Pattern 2	75.3	-2891.27	-3158.12	-2624.42
TGMV	Pattern 2	75.4	-2896.79	-3171.9	-2621.68
TGMV	Pattern 2	75.5	-2902.23	-3185.58	-2618.88
TGMV	Pattern 2	75.6	-2907.58	-3199.14	-2616.02
TGMV	Pattern 2	75.7	-2912.85	-3212.58	-2613.13
TGMV	Pattern 2	75.8	-2918.04	-3225.87	-2610.21
TGMV	Pattern 2	75.9	-2923.15	-3239.02	-2607.27
TGMV	Pattern 2	76	-2928.17	-3252.01	-2604.32
TGMV	Pattern 2	76.1	-2933.11	-3264.84	-2601.37
TGMV	Pattern 2	76.2	-2937.96	-3277.51	-2598.42
TGMV	Pattern 2	76.3	-2942.74	-3290	-2595.48
TGMV	Pattern 2	76.4	-2947.43	-3302.31	-2592.54
TGMV	Pattern 2	76.5	-2952.03	-3314.44	-2589.63
TGMV	Pattern 2	76.6	-2956.56	-3326.38	-2586.74
TGMV	Pattern 2	76.7	-2961	-3338.13	-2583.87
TGMV	Pattern 2	76.8	-2965.36	-3349.69	-2581.02
TGMV	Pattern 2	76.9	-2969.63	-3361.05	-2578.21
TGMV	Pattern 2	77	-2973.82	-3372.21	-2575.43
TGMV	Pattern 2	77.1	-2977.93	-3383.17	-2572.69
TGMV	Pattern 2	77.2	-2981.96	-3393.93	-2569.99
TGMV	Pattern 2	77.3	-2985.9	-3404.48	-2567.32
TGMV	Pattern 2	77.4	-2989.76	-3414.82	-2564.7
TGMV	Pattern 2	77.5	-2993.54	-3424.96	-2562.11
TGMV	Pattern 2	77.6	-2997.23	-3434.89	-2559.57
TGMV	Pattern 2	77.7	-3000.84	-3444.6	-2557.08
TGMV	Pattern 2	77.8	-3004.37	-3454.1	-2554.64
TGMV	Pattern 2	77.9	-3007.81	-3463.39	-2552.24
TGMV	Pattern 2	78	-3011.18	-3472.46	-2549.89
TGMV	Pattern 2	78.1	-3014.45	-3481.32	-2547.59
TGMV	Pattern 2	78.2	-3017.65	-3489.96	-2545.34
TGMV	Pattern 2	78.3	-3020.76	-3498.38	-2543.15
TGMV	Pattern 2	78.4	-3023.79	-3506.58	-2541
TGMV	Pattern 2	78.5	-3026.74	-3514.57	-2538.91
TGMV	Pattern 2	78.6	-3029.6	-3522.33	-2536.87
TGMV	Pattern 2	78.7	-3032.38	-3529.88	-2534.89
TGMV	Pattern 2	78.8	-3035.08	-3537.2	-2532.96
TGMV	Pattern 2	78.9	-3037.7	-3544.3	-2531.09
TGMV	Pattern 2	79	-3040.23	-3551.19	-2529.27
TGMV	Pattern 2	79.1	-3042.68	-3557.84	-2527.51
TGMV	Pattern 2	79.2	-3045.04	-3564.28	-2525.81
TGMV	Pattern 2	79.3	-3047.33	-3570.49	-2524.16
TGMV	Pattern 2	79.4	-3049.53	-3576.48	-2522.57
TGMV	Pattern 2	79.5	-3051.64	-3582.25	-2521.04
TGMV	Pattern 2	79.6	-3053.68	-3587.79	-2519.56
TGMV	Pattern 2	79.7	-3055.63	-3593.11	-2518.15
TGMV	Pattern 2	79.8	-3057.49	-3598.2	-2516.79
TGMV	Pattern 2	79.9	-3059.28	-3603.07	-2515.49
TGMV	Pattern 2	80	-3060.98	-3607.71	-2514.25
TGMV	Pattern 2	80.1	-3062.6	-3612.13	-2513.07
TGMV	Pattern 2	80.2	-3064.13	-3616.32	-2511.95
TGMV	Pattern 2	80.3	-3065.59	-3620.28	-2510.89
TGMV	Pattern 2	80.4	-3066.96	-3624.03	-2509.89
TGMV	Pattern 2	80.5	-3068.24	-3627.54	-2508.95
TGMV	Pattern 2	80.6	-3069.45	-3630.83	-2508.07
TGMV	Pattern 2	80.7	-3070.57	-3633.89	-2507.24
TGMV	Pattern 2	80.8	-3071.6	-3636.73	-2506.48
TGMV	Pattern 2	80.9	-3072.56	-3639.34	-2505.78
TGMV	Pattern 2	81	-3073.43	-3641.72	-2505.14
TGMV	Pattern 2	81.1	-3074.22	-3643.87	-2504.57
TGMV	Pattern 2	81.2	-3074.93	-3645.8	-2504.05
TGMV	Pattern 2	81.3	-3075.55	-3647.51	-2503.59
TGMV	Pattern 2	81.4	-3076.09	-3648.98	-2503.19
TGMV	Pattern 2	81.5	-3076.54	-3650.23	-2502.86
TGMV	Pattern 2	81.6	-3076.92	-3651.25	-2502.58
TGMV	Pattern 2	81.7	-3077.21	-3652.05	-2502.37
TGMV	Pattern 2	81.8	-3077.42	-3652.61	-2502.22
TGMV	Pattern 2	81.9	-3077.54	-3652.95	-2502.13
TGMV	Pattern 2	82	-3077.58	-3653.07	-2502.09
lingual	Pattern 1	44	18.8831	0.29946	37.4667
lingual	Pattern 1	44.1	18.8831	0.299461	37.4667
lingual	Pattern 1	44.2	18.8831	0.299461	37.4667
lingual	Pattern 1	44.3	18.8831	0.299461	37.4667
lingual	Pattern 1	44.4	18.8831	0.29946	37.4667
lingual	Pattern 1	44.5	18.8831	0.299461	37.4667
lingual	Pattern 1	44.6	18.8831	0.299461	37.4667
lingual	Pattern 1	44.7	18.8831	0.299459	37.4667
lingual	Pattern 1	44.8	18.8831	0.29946	37.4667
lingual	Pattern 1	44.9	18.8831	0.299461	37.4667
lingual	Pattern 1	45	18.8831	0.29946	37.4667
lingual	Pattern 1	45.1	18.8815	0.298871	37.4642
lingual	Pattern 1	45.2	18.8769	0.297104	37.4566
lingual	Pattern 1	45.3	18.8691	0.29416	37.444
lingual	Pattern 1	45.4	18.8582	0.290036	37.4264
lingual	Pattern 1	45.5	18.8442	0.284735	37.4037
lingual	Pattern 1	45.6	18.8271	0.278255	37.376
lingual	Pattern 1	45.7	18.8069	0.270597	37.3433
lingual	Pattern 1	45.8	18.7836	0.261759	37.3055
lingual	Pattern 1	45.9	18.7572	0.251739	37.2627
lingual	Pattern 1	46	18.7277	0.240541	37.2149
lingual	Pattern 1	46.1	18.6951	0.228162	37.162
lingual	Pattern 1	46.2	18.6593	0.2146	37.1041
lingual	Pattern 1	46.3	18.6205	0.199858	37.0411
lingual	Pattern 1	46.4	18.5785	0.183931	36.9731
lingual	Pattern 1	46.5	18.5335	0.166822	36.9001
lingual	Pattern 1	46.6	18.4853	0.148527	36.8221
lingual	Pattern 1	46.7	18.434	0.129047	36.739
lingual	Pattern 1	46.8	18.3796	0.108379	36.6509
lingual	Pattern 1	46.9	18.3221	0.086525	36.5577
lingual	Pattern 1	47	18.2615	0.0634808	36.4596
lingual	Pattern 1	47.1	18.1978	0.039246	36.3564
lingual	Pattern 1	47.2	18.131	0.0138198	36.2482
lingual	Pattern 1	47.3	18.0611	-0.0127985	36.1349
lingual	Pattern 1	47.4	17.988	-0.0406125	36.0167
lingual	Pattern 1	47.5	17.9119	-0.0696231	35.8934
lingual	Pattern 1	47.6	17.8326	-0.0998306	35.7651
lingual	Pattern 1	47.7	17.7503	-0.131238	35.6318
lingual	Pattern 1	47.8	17.6648	-0.163847	35.4935
lingual	Pattern 1	47.9	17.5763	-0.19766	35.3502
lingual	Pattern 1	48	17.4846	-0.232678	35.2018
lingual	Pattern 1	48.1	17.3898	-0.268904	35.0485
lingual	Pattern 1	48.2	17.2919	-0.30634	34.8901
lingual	Pattern 1	48.3	17.1909	-0.344989	34.7268
lingual	Pattern 1	48.4	17.0868	-0.384853	34.5584
lingual	Pattern 1	48.5	16.9796	-0.425934	34.385
lingual	Pattern 1	48.6	16.8692	-0.468236	34.2067
lingual	Pattern 1	48.7	16.7558	-0.511761	34.0234
lingual	Pattern 1	48.8	16.6393	-0.556513	33.835
lingual	Pattern 1	48.9	16.5196	-0.602494	33.6417
lingual	Pattern 1	49	16.3968	-0.649709	33.4434
lingual	Pattern 1	49.1	16.271	-0.698159	33.2401
lingual	Pattern 1	49.2	16.142	-0.74785	33.0319
lingual	Pattern 1	49.3	16.0099	-0.798786	32.8186
lingual	Pattern 1	49.4	15.8747	-0.850969	32.6004
lingual	Pattern 1	49.5	15.7364	-0.904405	32.3773
lingual	Pattern 1	49.6	15.595	-0.959097	32.1492
lingual	Pattern 1	49.7	15.4505	-1.01505	31.9161
lingual	Pattern 1	49.8	15.3029	-1.07227	31.6781
lingual	Pattern 1	49.9	15.1522	-1.13076	31.4351
lingual	Pattern 1	50	14.9983	-1.19053	31.1872
lingual	Pattern 1	50.1	14.8414	-1.25158	30.9344
lingual	Pattern 1	50.2	14.6813	-1.31392	30.6766
lingual	Pattern 1	50.3	14.5182	-1.37756	30.4139
lingual	Pattern 1	50.4	14.3519	-1.44249	30.1463
lingual	Pattern 1	50.5	14.1825	-1.50874	29.8738
lingual	Pattern 1	50.6	14.01	-1.57629	29.5964
lingual	Pattern 1	50.7	13.8345	-1.64518	29.3141
lingual	Pattern 1	50.8	13.6558	-1.71539	29.0269
lingual	Pattern 1	50.9	13.474	-1.78694	28.7348
lingual	Pattern 1	51	13.289	-1.85983	28.4379
lingual	Pattern 1	51.1	13.101	-1.93409	28.1361
lingual	Pattern 1	51.2	12.9099	-2.00971	27.8295
lingual	Pattern 1	51.3	12.7156	-2.08671	27.518
lingual	Pattern 1	51.4	12.5183	-2.16509	27.2017
lingual	Pattern 1	51.5	12.3178	-2.24488	26.8806
lingual	Pattern 1	51.6	12.1143	-2.32607	26.5546
lingual	Pattern 1	51.7	11.9076	-2.40869	26.2239
lingual	Pattern 1	51.8	11.6978	-2.49275	25.8884
lingual	Pattern 1	51.9	11.485	-2.57825	25.5482
lingual	Pattern 1	52	11.269	-2.66522	25.2031
lingual	Pattern 1	52.1	11.0499	-2.75368	24.8534
lingual	Pattern 1	52.2	10.8277	-2.84363	24.4989
lingual	Pattern 1	52.3	10.6023	-2.9351	24.1398
lingual	Pattern 1	52.4	10.3739	-3.0281	23.7759
lingual	Pattern 1	52.5	10.1424	-3.12265	23.4074
lingual	Pattern 1	52.6	9.90774	-3.21878	23.0343
lingual	Pattern 1	52.7	9.67	-3.31651	22.6565
lingual	Pattern 1	52.8	9.42914	-3.41586	22.2741
lingual	Pattern 1	52.9	9.18518	-3.51685	21.8872
lingual	Pattern 1	53	8.93811	-3.61952	21.4957
lingual	Pattern 1	53.1	8.68793	-3.72389	21.0997
lingual	Pattern 1	53.2	8.43464	-3.82999	20.6993
lingual	Pattern 1	53.3	8.17825	-3.93786	20.2944
lingual	Pattern 1	53.4	7.91875	-4.04752	19.885
lingual	Pattern 1	53.5	7.65614	-4.15902	19.4713
lingual	Pattern 1	53.6	7.39042	-4.2724	19.0532
lingual	Pattern 1	53.7	7.12159	-4.38769	18.6309
lingual	Pattern 1	53.8	6.84966	-4.50494	18.2043
lingual	Pattern 1	53.9	6.57462	-4.62421	17.7735
lingual	Pattern 1	54	6.29647	-4.74554	17.3385
lingual	Pattern 1	54.1	6.01522	-4.86899	16.8994
lingual	Pattern 1	54.2	5.73085	-4.99461	16.4563
lingual	Pattern 1	54.3	5.44338	-5.12248	16.0092
lingual	Pattern 1	54.4	5.1528	-5.25266	15.5583
lingual	Pattern 1	54.5	4.85911	-5.38523	15.1035
lingual	Pattern 1	54.6	4.56232	-5.52026	14.6449
lingual	Pattern 1	54.7	4.26241	-5.65785	14.1827
lingual	Pattern 1	54.8	3.9594	-5.79808	13.7169
lingual	Pattern 1	54.9	3.65328	-5.94107	13.2476
lingual	Pattern 1	55	3.34406	-6.08691	12.775
lingual	Pattern 1	55.1	3.03172	-6.23573	12.2992
lingual	Pattern 1	55.2	2.71628	-6.38766	11.8202
lingual	Pattern 1	55.3	2.39773	-6.54282	11.3383
lingual	Pattern 1	55.4	2.07607	-6.70139	10.8535
lingual	Pattern 1	55.5	1.75131	-6.86351	10.3661
lingual	Pattern 1	55.6	1.42343	-7.02937	9.87623
lingual	Pattern 1	55.7	1.09245	-7.19916	9.38406
lingual	Pattern 1	55.8	0.758361	-7.37309	8.88981
lingual	Pattern 1	55.9	0.421164	-7.55138	8.39371
lingual	Pattern 1	56	0.0808592	-7.73429	7.89601
lingual	Pattern 1	56.1	-0.262554	-7.92208	7.39697
lingual	Pattern 1	56.2	-0.609074	-8.11504	6.8969
lingual	Pattern 1	56.3	-0.958702	-8.3135	6.39609
lingual	Pattern 1	56.4	-1.31144	-8.51778	5.8949
lingual	Pattern 1	56.5	-1.66728	-8.72826	5.3937
lingual	Pattern 1	56.6	-2.02623	-8.94534	4.89287
lingual	Pattern 1	56.7	-2.38829	-9.16944	4.39285
lingual	Pattern 1	56.8	-2.75346	-9.40102	3.8941
lingual	Pattern 1	56.9	-3.12174	-9.64058	3.39711
lingual	Pattern 1	57	-3.49312	-9.88864	2.9024
lingual	Pattern 1	57.1	-3.86761	-10.1457	2.41052
lingual	Pattern 1	57.2	-4.24521	-10.4125	1.92204
lingual	Pattern 1	57.3	-4.62591	-10.6894	1.43758
lingual	Pattern 1	57.4	-5.00879	-10.9765	0.958958
lingual	Pattern 1	57.5	-5.39079	-11.272	0.490399
lingual	Pattern 1	57.6	-5.77167	-11.5755	0.0321741
lingual	Pattern 1	57.7	-6.15144	-11.8871	-0.415797
lingual	Pattern 1	57.8	-6.53009	-12.2065	-0.853638
lingual	Pattern 1	57.9	-6.90763	-12.5337	-1.28151
lingual	Pattern 1	58	-7.28405	-12.8685	-1.69963
lingual	Pattern 1	58.1	-7.65936	-13.2105	-2.10823
lingual	Pattern 1	58.2	-8.03356	-13.5595	-2.50759
lingual	Pattern 1	58.3	-8.40664	-13.9152	-2.89804
lingual	Pattern 1	58.4	-8.77861	-14.2773	-3.27991
lingual	Pattern 1	58.5	-9.14946	-14.6454	-3.65357
lingual	Pattern 1	58.6	-9.5192	-15.019	-4.01943
lingual	Pattern 1	58.7	-9.88783	-15.3978	-4.37788
lingual	Pattern 1	58.8	-10.2553	-15.7813	-4.72936
lingual	Pattern 1	58.9	-10.6217	-16.1692	-5.07428
lingual	Pattern 1	59	-10.987	-16.561	-5.41308
lingual	Pattern 1	59.1	-11.3512	-16.9562	-5.74618
lingual	Pattern 1	59.2	-11.7142	-17.3545	-6.07401
lingual	Pattern 1	59.3	-12.0762	-17.7554	-6.39699
lingual	Pattern 1	59.4	-12.437	-18.1585	-6.71551
lingual	Pattern 1	59.5	-12.7967	-18.5635	-7.02996
lingual	Pattern 1	59.6	-13.1553	-18.9699	-7.34073
lingual	Pattern 1	59.7	-13.5128	-19.3774	-7.64817
lingual	Pattern 1	59.8	-13.8692	-19.7857	-7.95262
lingual	Pattern 1	59.9	-14.2244	-20.1944	-8.25441
lingual	Pattern 1	60	-14.5786	-20.6033	-8.55385
lingual	Pattern 1	60.1	-14.9316	-21.0119	-8.85124
lingual	Pattern 1	60.2	-15.2835	-21.4202	-9.14683
lingual	Pattern 1	60.3	-15.6343	-21.8277	-9.4409
lingual	Pattern 1	60.4	-15.984	-22.2343	-9.73367
lingual	Pattern 1	60.5	-16.3325	-22.6397	-10.0254
lingual	Pattern 1	60.6	-16.68	-23.0437	-10.3162
lingual	Pattern 1	60.7	-17.0263	-23.4462	-10.6065
lingual	Pattern 1	60.8	-17.3716	-23.8469	-10.8962
lingual	Pattern 1	60.9	-17.7157	-24.2457	-11.1856
lingual	Pattern 1	61	-18.0587	-24.6424	-11.4749
lingual	Pattern 1	61.1	-18.4005	-25.0369	-11.7642
lingual	Pattern 1	61.2	-18.7413	-25.429	-12.0536
lingual	Pattern 1	61.3	-19.081	-25.8186	-12.3433
lingual	Pattern 1	61.4	-19.4195	-26.2057	-12.6334
lingual	Pattern 1	61.5	-19.7569	-26.5899	-12.9239
lingual	Pattern 1	61.6	-20.0932	-26.9714	-13.2151
lingual	Pattern 1	61.7	-20.4284	-27.35	-13.5069
lingual	Pattern 1	61.8	-20.7625	-27.7255	-13.7995
lingual	Pattern 1	61.9	-21.0955	-28.098	-14.093
lingual	Pattern 1	62	-21.4274	-28.4674	-14.3873
lingual	Pattern 1	62.1	-21.7581	-28.8335	-14.6827
lingual	Pattern 1	62.2	-22.0877	-29.1964	-14.979
lingual	Pattern 1	62.3	-22.4162	-29.5559	-15.2765
lingual	Pattern 1	62.4	-22.7436	-29.9121	-15.5752
lingual	Pattern 1	62.5	-23.0699	-30.2648	-15.875
lingual	Pattern 1	62.6	-23.3951	-30.6141	-16.1761
lingual	Pattern 1	62.7	-23.7191	-30.9599	-16.4784
lingual	Pattern 1	62.8	-24.0421	-31.3021	-16.782
lingual	Pattern 1	62.9	-24.3639	-31.6408	-17.087
lingual	Pattern 1	63	-24.6846	-31.9759	-17.3933
lingual	Pattern 1	63.1	-25.0042	-32.3074	-17.701
lingual	Pattern 1	63.2	-25.3227	-32.6353	-18.0101
lingual	Pattern 1	63.3	-25.6401	-32.9595	-18.3206
lingual	Pattern 1	63.4	-25.9563	-33.2801	-18.6326
lingual	Pattern 1	63.5	-26.2715	-33.597	-18.9459
lingual	Pattern 1	63.6	-26.5855	-33.9103	-19.2607
lingual	Pattern 1	63.7	-26.8984	-34.2199	-19.5769
lingual	Pattern 1	63.8	-27.2102	-34.5258	-19.8946
lingual	Pattern 1	63.9	-27.5209	-34.8281	-20.2136
lingual	Pattern 1	64	-27.8304	-35.1268	-20.5341
lingual	Pattern 1	64.1	-28.1389	-35.4218	-20.856
lingual	Pattern 1	64.2	-28.4462	-35.7132	-21.1792
lingual	Pattern 1	64.3	-28.7525	-36.0011	-21.5039
lingual	Pattern 1	64.4	-29.0576	-36.2853	-21.8298
lingual	Pattern 1	64.5	-29.3616	-36.566	-22.1571
lingual	Pattern 1	64.6	-29.6645	-36.8432	-22.4857
lingual	Pattern 1	64.7	-29.9662	-37.117	-22.8155
lingual	Pattern 1	64.8	-30.2669	-37.3873	-23.1465
lingual	Pattern 1	64.9	-30.5664	-37.6542	-23.4787
lingual	Pattern 1	65	-30.8648	-37.9177	-23.812
lingual	Pattern 1	65.1	-31.1622	-38.178	-24.1463
lingual	Pattern 1	65.2	-31.4584	-38.435	-24.4817
lingual	Pattern 1	65.3	-31.7534	-38.6889	-24.818
lingual	Pattern 1	65.4	-32.0474	-38.9397	-25.1551
lingual	Pattern 1	65.5	-32.3403	-39.1874	-25.4931
lingual	Pattern 1	65.6	-32.632	-39.4323	-25.8317
lingual	Pattern 1	65.7	-32.9226	-39.6743	-26.171
lingual	Pattern 1	65.8	-33.2121	-39.9135	-26.5108
lingual	Pattern 1	65.9	-33.5005	-40.1501	-26.851
lingual	Pattern 1	66	-33.7878	-40.3842	-27.1914
lingual	Pattern 1	66.1	-34.074	-40.6159	-27.5321
lingual	Pattern 1	66.2	-34.3591	-40.8454	-27.8727
lingual	Pattern 1	66.3	-34.643	-41.0727	-28.2133
lingual	Pattern 1	66.4	-34.9258	-41.2981	-28.5536
lingual	Pattern 1	66.5	-35.2075	-41.5217	-28.8934
lingual	Pattern 1	66.6	-35.4881	-41.7437	-29.2326
lingual	Pattern 1	66.7	-35.7676	-41.9643	-29.571
lingual	Pattern 1	66.8	-36.046	-42.1837	-29.9083
lingual	Pattern 1	66.9	-36.3232	-42.4021	-30.2444
lingual	Pattern 1	67	-36.5994	-42.6199	-30.5789
lingual	Pattern 1	67.1	-36.8744	-42.8371	-30.9117
lingual	Pattern 1	67.2	-37.1483	-43.0542	-31.2424
lingual	Pattern 1	67.3	-37.4211	-43.2714	-31.5708
lingual	Pattern 1	67.4	-37.6928	-43.4891	-31.8965
lingual	Pattern 1	67.5	-37.9634	-43.7075	-32.2193
lingual	Pattern 1	67.6	-38.2328	-43.927	-32.5387
lingual	Pattern 1	67.7	-38.5012	-44.148	-32.8544
lingual	Pattern 1	67.8	-38.7684	-44.3708	-33.166
lingual	Pattern 1	67.9	-39.0345	-44.5959	-33.4731
lingual	Pattern 1	68	-39.2995	-44.8237	-33.7753
lingual	Pattern 1	68.1	-39.5634	-45.0546	-34.0722
lingual	Pattern 1	68.2	-39.8262	-45.2891	-34.3633
lingual	Pattern 1	68.3	-40.0878	-45.5275	-34.6482
lingual	Pattern 1	68.4	-40.3484	-45.7703	-34.9264
lingual	Pattern 1	68.5	-40.6078	-46.018	-35.1976
lingual	Pattern 1	68.6	-40.8661	-46.271	-35.4612
lingual	Pattern 1	68.7	-41.1233	-46.5298	-35.7168
lingual	Pattern 1	68.8	-41.3794	-46.7946	-35.9641
lingual	Pattern 1	68.9	-41.6344	-47.066	-36.2027
lingual	Pattern 1	69	-41.8882	-47.3442	-36.4322
lingual	Pattern 1	69.1	-42.141	-47.6296	-36.6523
lingual	Pattern 1	69.2	-42.3926	-47.9225	-36.8626
lingual	Pattern 1	69.3	-42.6431	-48.2231	-37.0631
lingual	Pattern 1	69.4	-42.8925	-48.5316	-37.2533
lingual	Pattern 1	69.5	-43.1408	-48.8483	-37.4333
lingual	Pattern 1	69.6	-43.3879	-49.1731	-37.6028
lingual	Pattern 1	69.7	-43.634	-49.5061	-37.7618
lingual	Pattern 1	69.8	-43.8782	-49.8456	-37.9108
lingual	Pattern 1	69.9	-44.1204	-50.1905	-38.0502
lingual	Pattern 1	70	-44.3606	-50.5404	-38.1808
lingual	Pattern 1	70.1	-44.5988	-50.8945	-38.3032
lingual	Pattern 1	70.2	-44.8351	-51.2523	-38.4178
lingual	Pattern 1	70.3	-45.0693	-51.6133	-38.5253
lingual	Pattern 1	70.4	-45.3016	-51.977	-38.6261
lingual	Pattern 1	70.5	-45.5318	-52.343	-38.7207
lingual	Pattern 1	70.6	-45.7601	-52.7106	-38.8095
lingual	Pattern 1	70.7	-45.9863	-53.0796	-38.893
lingual	Pattern 1	70.8	-46.2106	-53.4496	-38.9716
lingual	Pattern 1	70.9	-46.4329	-53.8202	-39.0456
lingual	Pattern 1	71	-46.6532	-54.191	-39.1153
lingual	Pattern 1	71.1	-46.8715	-54.5619	-39.1811
lingual	Pattern 1	71.2	-47.0878	-54.9324	-39.2431
lingual	Pattern 1	71.3	-47.3021	-55.3023	-39.3018
lingual	Pattern 1	71.4	-47.5144	-55.6715	-39.3573
lingual	Pattern 1	71.5	-47.7247	-56.0396	-39.4098
lingual	Pattern 1	71.6	-47.933	-56.4064	-39.4596
lingual	Pattern 1	71.7	-48.1394	-56.7719	-39.5068
lingual	Pattern 1	71.8	-48.3437	-57.1358	-39.5516
lingual	Pattern 1	71.9	-48.546	-57.4979	-39.5942
lingual	Pattern 1	72	-48.7464	-57.8581	-39.6347
lingual	Pattern 1	72.1	-48.9448	-58.2163	-39.6732
lingual	Pattern 1	72.2	-49.1411	-58.5724	-39.7099
lingual	Pattern 1	72.3	-49.3355	-58.9261	-39.7449
lingual	Pattern 1	72.4	-49.5279	-59.2775	-39.7782
lingual	Pattern 1	72.5	-49.7182	-59.6265	-39.81
lingual	Pattern 1	72.6	-49.9066	-59.9728	-39.8405
lingual	Pattern 1	72.7	-50.093	-60.3165	-39.8695
lingual	Pattern 1	72.8	-50.2774	-60.6575	-39.8973
lingual	Pattern 1	72.9	-50.4598	-60.9957	-39.9239
lingual	Pattern 1	73	-50.6403	-61.3311	-39.9494
lingual	Pattern 1	73.1	-50.8187	-61.6635	-39.9739
lingual	Pattern 1	73.2	-50.9951	-61.9929	-39.9973
lingual	Pattern 1	73.3	-51.1695	-62.3193	-40.0198
lingual	Pattern 1	73.4	-51.342	-62.6426	-40.0414
lingual	Pattern 1	73.5	-51.5124	-62.9628	-40.0621
lingual	Pattern 1	73.6	-51.6809	-63.2798	-40.082
lingual	Pattern 1	73.7	-51.8474	-63.5935	-40.1012
lingual	Pattern 1	73.8	-52.0118	-63.9041	-40.1196
lingual	Pattern 1	73.9	-52.1743	-64.2113	-40.1373
lingual	Pattern 1	74	-52.3348	-64.5152	-40.1544
lingual	Pattern 1	74.1	-52.4933	-64.8157	-40.1708
lingual	Pattern 1	74.2	-52.6498	-65.1128	-40.1867
lingual	Pattern 1	74.3	-52.8043	-65.4066	-40.202
lingual	Pattern 1	74.4	-52.9568	-65.6968	-40.2167
lingual	Pattern 1	74.5	-53.1073	-65.9837	-40.2309
lingual	Pattern 1	74.6	-53.2558	-66.267	-40.2446
lingual	Pattern 1	74.7	-53.4023	-66.5468	-40.2578
lingual	Pattern 1	74.8	-53.5468	-66.8231	-40.2706
lingual	Pattern 1	74.9	-53.6894	-67.0958	-40.283
lingual	Pattern 1	75	-53.8299	-67.365	-40.2949
lingual	Pattern 1	75.1	-53.9685	-67.6306	-40.3064
lingual	Pattern 1	75.2	-54.105	-67.8925	-40.3175
lingual	Pattern 1	75.3	-54.2396	-68.1509	-40.3283
lingual	Pattern 1	75.4	-54.3722	-68.4056	-40.3387
lingual	Pattern 1	75.5	-54.5028	-68.6567	-40.3488
lingual	Pattern 1	75.6	-54.6313	-68.9041	-40.3585
lingual	Pattern 1	75.7	-54.7579	-69.1479	-40.368
lingual	Pattern 1	75.8	-54.8825	-69.388	-40.3771
lingual	Pattern 1	75.9	-55.0051	-69.6244	-40.3859
lingual	Pattern 1	76	-55.1257	-69.857	-40.3944
lingual	Pattern 1	76.1	-55.2444	-70.086	-40.4027
lingual	Pattern 1	76.2	-55.361	-70.3112	-40.4107
lingual	Pattern 1	76.3	-55.4756	-70.5327	-40.4185
lingual	Pattern 1	76.4	-55.5882	-70.7505	-40.426
lingual	Pattern 1	76.5	-55.6989	-70.9645	-40.4333
lingual	Pattern 1	76.6	-55.8075	-71.1748	-40.4403
lingual	Pattern 1	76.7	-55.9142	-71.3813	-40.4471
lingual	Pattern 1	76.8	-56.0188	-71.584	-40.4537
lingual	Pattern 1	76.9	-56.1215	-71.7829	-40.4601
lingual	Pattern 1	77	-56.2222	-71.9781	-40.4663
lingual	Pattern 1	77.1	-56.3209	-72.1695	-40.4723
lingual	Pattern 1	77.2	-56.4176	-72.357	-40.4781
lingual	Pattern 1	77.3	-56.5122	-72.5408	-40.4837
lingual	Pattern 1	77.4	-56.6049	-72.7208	-40.4891
lingual	Pattern 1	77.5	-56.6957	-72.897	-40.4943
lingual	Pattern 1	77.6	-56.7844	-73.0693	-40.4994
lingual	Pattern 1	77.7	-56.8711	-73.2378	-40.5043
lingual	Pattern 1	77.8	-56.9558	-73.4025	-40.5091
lingual	Pattern 1	77.9	-57.0385	-73.5634	-40.5137
lingual	Pattern 1	78	-57.1193	-73.7204	-40.5181
lingual	Pattern 1	78.1	-57.198	-73.8736	-40.5224
lingual	Pattern 1	78.2	-57.2748	-74.023	-40.5266
lingual	Pattern 1	78.3	-57.3495	-74.1685	-40.5306
lingual	Pattern 1	78.4	-57.4223	-74.3102	-40.5344
lingual	Pattern 1	78.5	-57.4931	-74.448	-40.5381
lingual	Pattern 1	78.6	-57.5618	-74.582	-40.5417
lingual	Pattern 1	78.7	-57.6286	-74.7121	-40.5452
lingual	Pattern 1	78.8	-57.6934	-74.8383	-40.5485
lingual	Pattern 1	78.9	-57.7562	-74.9607	-40.5517
lingual	Pattern 1	79	-57.817	-75.0792	-40.5548
lingual	Pattern 1	79.1	-57.8758	-75.1939	-40.5578
lingual	Pattern 1	79.2	-57.9326	-75.3047	-40.5606
lingual	Pattern 1	79.3	-57.9875	-75.4116	-40.5633
lingual	Pattern 1	79.4	-58.0403	-75.5147	-40.5659
lingual	Pattern 1	79.5	-58.0911	-75.6138	-40.5684
lingual	Pattern 1	79.6	-58.14	-75.7091	-40.5708
lingual	Pattern 1	79.7	-58.1868	-75.8006	-40.5731
lingual	Pattern 1	79.8	-58.2317	-75.8881	-40.5752
lingual	Pattern 1	79.9	-58.2745	-75.9718	-40.5773
lingual	Pattern 1	80	-58.3154	-76.0516	-40.5793
lingual	Pattern 1	80.1	-58.3543	-76.1275	-40.5811
lingual	Pattern 1	80.2	-58.3912	-76.1995	-40.5829
lingual	Pattern 1	80.3	-58.426	-76.2676	-40.5845
lingual	Pattern 1	80.4	-58.4589	-76.3318	-40.586
lingual	Pattern 1	80.5	-58.4898	-76.3922	-40.5875
lingual	Pattern 1	80.6	-58.5187	-76.4487	-40.5888
lingual	Pattern 1	80.7	-58.5457	-76.5012	-40.5901
lingual	Pattern 1	80.8	-58.5706	-76.5499	-40.5913
lingual	Pattern 1	80.9	-58.5935	-76.5947	-40.5923
lingual	Pattern 1	81	-58.6144	-76.6356	-40.5933
lingual	Pattern 1	81.1	-58.6334	-76.6726	-40.5942
lingual	Pattern 1	81.2	-58.6503	-76.7057	-40.5949
lingual	Pattern 1	81.3	-58.6653	-76.7349	-40.5956
lingual	Pattern 1	81.4	-58.6782	-76.7603	-40.5962
lingual	Pattern 1	81.5	-58.6892	-76.7817	-40.5967
lingual	Pattern 1	81.6	-58.6982	-76.7992	-40.5971
lingual	Pattern 1	81.7	-58.7051	-76.8128	-40.5974
lingual	Pattern 1	81.8	-58.7101	-76.8226	-40.5977
lingual	Pattern 1	81.9	-58.7131	-76.8284	-40.5978
lingual	Pattern 1	82	-58.7141	-76.8304	-40.5979
lingual	Pattern 2	44	-18.911	-37.1297	-0.692219
lingual	Pattern 2	44.1	-18.9112	-37.1291	-0.693354
lingual	Pattern 2	44.2	-18.9121	-37.1274	-0.696765
lingual	Pattern 2	44.3	-18.9135	-37.1245	-0.702449
lingual	Pattern 2	44.4	-18.9154	-37.1205	-0.710407
lingual	Pattern 2	44.5	-18.918	-37.1153	-0.720638
lingual	Pattern 2	44.6	-18.921	-37.1089	-0.733141
lingual	Pattern 2	44.7	-18.9247	-37.1014	-0.747917
lingual	Pattern 2	44.8	-18.9289	-37.0928	-0.764967
lingual	Pattern 2	44.9	-18.9336	-37.083	-0.784289
lingual	Pattern 2	45	-18.939	-37.0721	-0.805881
lingual	Pattern 2	45.1	-18.9449	-37.06	-0.829745
lingual	Pattern 2	45.2	-18.9513	-37.0467	-0.85588
lingual	Pattern 2	45.3	-18.9583	-37.0323	-0.884286
lingual	Pattern 2	45.4	-18.9659	-37.0168	-0.91496
lingual	Pattern 2	45.5	-18.974	-37.0001	-0.947905
lingual	Pattern 2	45.6	-18.9827	-36.9822	-0.983116
lingual	Pattern 2	45.7	-18.9919	-36.9633	-1.0206
lingual	Pattern 2	45.8	-19.0017	-36.9431	-1.06034
lingual	Pattern 2	45.9	-19.0121	-36.9218	-1.10236
lingual	Pattern 2	46	-19.023	-36.8994	-1.14663
lingual	Pattern 2	46.1	-19.0345	-36.8758	-1.19317
lingual	Pattern 2	46.2	-19.0466	-36.8511	-1.24198
lingual	Pattern 2	46.3	-19.0592	-36.8253	-1.29305
lingual	Pattern 2	46.4	-19.0723	-36.7983	-1.34637
lingual	Pattern 2	46.5	-19.0861	-36.7702	-1.40196
lingual	Pattern 2	46.6	-19.1004	-36.7409	-1.4598
lingual	Pattern 2	46.7	-19.1152	-36.7105	-1.5199
lingual	Pattern 2	46.8	-19.1306	-36.679	-1.58226
lingual	Pattern 2	46.9	-19.1466	-36.6463	-1.64687
lingual	Pattern 2	47	-19.1631	-36.6125	-1.71373
lingual	Pattern 2	47.1	-19.1802	-36.5776	-1.78285
lingual	Pattern 2	47.2	-19.1979	-36.5415	-1.85421
lingual	Pattern 2	47.3	-19.2161	-36.5043	-1.92782
lingual	Pattern 2	47.4	-19.2348	-36.466	-2.00367
lingual	Pattern 2	47.5	-19.2542	-36.4266	-2.08177
lingual	Pattern 2	47.6	-19.2741	-36.386	-2.16211
lingual	Pattern 2	47.7	-19.2945	-36.3444	-2.24469
lingual	Pattern 2	47.8	-19.3155	-36.3016	-2.3295
lingual	Pattern 2	47.9	-19.3371	-36.2577	-2.41655
lingual	Pattern 2	48	-19.3592	-36.2127	-2.50583
lingual	Pattern 2	48.1	-19.3819	-36.1665	-2.59733
lingual	Pattern 2	48.2	-19.4052	-36.1193	-2.69107
lingual	Pattern 2	48.3	-19.429	-36.071	-2.78703
lingual	Pattern 2	48.4	-19.4534	-36.0216	-2.8852
lingual	Pattern 2	48.5	-19.4783	-35.971	-2.9856
lingual	Pattern 2	48.6	-19.5038	-35.9194	-3.08821
lingual	Pattern 2	48.7	-19.5299	-35.8667	-3.19303
lingual	Pattern 2	48.8	-19.5565	-35.8129	-3.30005
lingual	Pattern 2	48.9	-19.5837	-35.7581	-3.40928
lingual	Pattern 2	49	-19.6114	-35.7021	-3.52071
lingual	Pattern 2	49.1	-19.6397	-35.6451	-3.63433
lingual	Pattern 2	49.2	-19.6686	-35.587	-3.75014
lingual	Pattern 2	49.3	-19.698	-35.5278	-3.86814
lingual	Pattern 2	49.4	-19.728	-35.4676	-3.98832
lingual	Pattern 2	49.5	-19.7585	-35.4063	-4.11068
lingual	Pattern 2	49.6	-19.7896	-35.344	-4.23521
lingual	Pattern 2	49.7	-19.8213	-35.2806	-4.3619
lingual	Pattern 2	49.8	-19.8535	-35.2162	-4.49076
lingual	Pattern 2	49.9	-19.8863	-35.1508	-4.62176
lingual	Pattern 2	50	-19.9196	-35.0843	-4.75492
lingual	Pattern 2	50.1	-19.9535	-35.0168	-4.89022
lingual	Pattern 2	50.2	-19.988	-34.9483	-5.02765
lingual	Pattern 2	50.3	-20.023	-34.8788	-5.16721
lingual	Pattern 2	50.4	-20.0586	-34.8083	-5.30889
lingual	Pattern 2	50.5	-20.0947	-34.7368	-5.45268
lingual	Pattern 2	50.6	-20.1314	-34.6643	-5.59858
lingual	Pattern 2	50.7	-20.1687	-34.5908	-5.74657
lingual	Pattern 2	50.8	-20.2065	-34.5164	-5.89665
lingual	Pattern 2	50.9	-20.2449	-34.441	-6.0488
lingual	Pattern 2	51	-20.2838	-34.3647	-6.20302
lingual	Pattern 2	51.1	-20.3234	-34.2874	-6.35929
lingual	Pattern 2	51.2	-20.3634	-34.2092	-6.51761
lingual	Pattern 2	51.3	-20.404	-34.1301	-6.67796
lingual	Pattern 2	51.4	-20.4452	-34.0501	-6.84033
lingual	Pattern 2	51.5	-20.487	-33.9693	-7.00471
lingual	Pattern 2	51.6	-20.5293	-33.8875	-7.17108
lingual	Pattern 2	51.7	-20.5722	-33.8049	-7.33942
lingual	Pattern 2	51.8	-20.6156	-33.7214	-7.50973
lingual	Pattern 2	51.9	-20.6596	-33.6372	-7.68198
lingual	Pattern 2	52	-20.7041	-33.5521	-7.85617
lingual	Pattern 2	52.1	-20.7492	-33.4662	-8.03226
lingual	Pattern 2	52.2	-20.7949	-33.3796	-8.21024
lingual	Pattern 2	52.3	-20.8411	-33.2922	-8.39009
lingual	Pattern 2	52.4	-20.8879	-33.2041	-8.57179
lingual	Pattern 2	52.5	-20.9353	-33.1152	-8.75531
lingual	Pattern 2	52.6	-20.9832	-33.0257	-8.94063
lingual	Pattern 2	52.7	-21.0317	-32.9356	-9.12773
lingual	Pattern 2	52.8	-21.0807	-32.8448	-9.31657
lingual	Pattern 2	52.9	-21.1303	-32.7534	-9.50712
lingual	Pattern 2	53	-21.1804	-32.6615	-9.69936
lingual	Pattern 2	53.1	-21.2311	-32.5691	-9.89324
lingual	Pattern 2	53.2	-21.2824	-32.4761	-10.0887
lingual	Pattern 2	53.3	-21.3343	-32.3827	-10.2858
lingual	Pattern 2	53.4	-21.3867	-32.2889	-10.4844
lingual	Pattern 2	53.5	-21.4396	-32.1947	-10.6845
lingual	Pattern 2	53.6	-21.4931	-32.1002	-10.8861
lingual	Pattern 2	53.7	-21.5472	-32.0054	-11.089
lingual	Pattern 2	53.8	-21.6018	-31.9104	-11.2933
lingual	Pattern 2	53.9	-21.657	-31.8153	-11.4988
lingual	Pattern 2	54	-21.7128	-31.72	-11.7056
lingual	Pattern 2	54.1	-21.7691	-31.6247	-11.9135
lingual	Pattern 2	54.2	-21.826	-31.5295	-12.1225
lingual	Pattern 2	54.3	-21.8834	-31.4344	-12.3325
lingual	Pattern 2	54.4	-21.9414	-31.3395	-12.5434
lingual	Pattern 2	54.5	-22	-31.2449	-12.7551
lingual	Pattern 2	54.6	-22.0591	-31.1507	-12.9675
lingual	Pattern 2	54.7	-22.1188	-31.0569	-13.1806
lingual	Pattern 2	54.8	-22.179	-30.9638	-13.3942
lingual	Pattern 2	54.9	-22.2398	-30.8715	-13.6082
lingual	Pattern 2	55	-22.3012	-30.78	-13.8224
lingual	Pattern 2	55.1	-22.3631	-30.6895	-14.0367
lingual	Pattern 2	55.2	-22.4256	-30.6002	-14.251
lingual	Pattern 2	55.3	-22.4886	-30.5122	-14.4651
lingual	Pattern 2	55.4	-22.5522	-30.4257	-14.6787
lingual	Pattern 2	55.5	-22.6164	-30.341	-14.8918
lingual	Pattern 2	55.6	-22.6811	-30.2581	-15.1041
lingual	Pattern 2	55.7	-22.7464	-30.1775	-15.3153
lingual	Pattern 2	55.8	-22.8122	-30.0992	-15.5252
lingual	Pattern 2	55.9	-22.8786	-30.0237	-15.7336
lingual	Pattern 2	56	-22.9456	-29.9511	-15.9401
lingual	Pattern 2	56.1	-23.0131	-29.8818	-16.1445
lingual	Pattern 2	56.2	-23.0812	-29.8161	-16.3463
lingual	Pattern 2	56.3	-23.1498	-29.7544	-16.5453
lingual	Pattern 2	56.4	-23.2191	-29.6971	-16.741
lingual	Pattern 2	56.5	-23.2888	-29.6446	-16.933
lingual	Pattern 2	56.6	-23.3591	-29.5973	-17.1209
lingual	Pattern 2	56.7	-23.4301	-29.556	-17.3043
lingual	Pattern 2	56.8	-23.5031	-29.5234	-17.4829
lingual	Pattern 2	56.9	-23.5786	-29.5003	-17.6568
lingual	Pattern 2	57	-23.6564	-29.4869	-17.8259
lingual	Pattern 2	57.1	-23.7367	-29.4831	-17.9903
lingual	Pattern 2	57.2	-23.8194	-29.4888	-18.1499
lingual	Pattern 2	57.3	-23.9045	-29.504	-18.3049
lingual	Pattern 2	57.4	-23.992	-29.5287	-18.4553
lingual	Pattern 2	57.5	-24.082	-29.5627	-18.6012
lingual	Pattern 2	57.6	-24.1744	-29.6059	-18.7428
lingual	Pattern 2	57.7	-24.2692	-29.6582	-18.8801
lingual	Pattern 2	57.8	-24.3664	-29.7194	-19.0134
lingual	Pattern 2	57.9	-24.4661	-29.7892	-19.1429
lingual	Pattern 2	58	-24.5681	-29.8675	-19.2687
lingual	Pattern 2	58.1	-24.6726	-29.954	-19.3912
lingual	Pattern 2	58.2	-24.7796	-30.0486	-19.5106
lingual	Pattern 2	58.3	-24.8889	-30.1508	-19.627
lingual	Pattern 2	58.4	-25.0007	-30.2604	-19.7409
lingual	Pattern 2	58.5	-25.1149	-30.3772	-19.8526
lingual	Pattern 2	58.6	-25.2315	-30.5008	-19.9622
lingual	Pattern 2	58.7	-25.3505	-30.6309	-20.0702
lingual	Pattern 2	58.8	-25.472	-30.7672	-20.1767
lingual	Pattern 2	58.9	-25.5959	-30.9095	-20.2822
lingual	Pattern 2	59	-25.7222	-31.0575	-20.3869
lingual	Pattern 2	59.1	-25.8509	-31.2107	-20.4911
lingual	Pattern 2	59.2	-25.9821	-31.369	-20.5951
lingual	Pattern 2	59.3	-26.1156	-31.5321	-20.6992
lingual	Pattern 2	59.4	-26.2516	-31.6997	-20.8036
lingual	Pattern 2	59.5	-26.3901	-31.8715	-20.9086
lingual	Pattern 2	59.6	-26.5309	-32.0473	-21.0145
lingual	Pattern 2	59.7	-26.6742	-32.2268	-21.1215
lingual	Pattern 2	59.8	-26.8199	-32.4099	-21.2299
lingual	Pattern 2	59.9	-26.968	-32.5962	-21.3398
lingual	Pattern 2	60	-27.1185	-32.7856	-21.4515
lingual	Pattern 2	60.1	-27.2715	-32.9779	-21.5651
lingual	Pattern 2	60.2	-27.4269	-33.1729	-21.6809
lingual	Pattern 2	60.3	-27.5847	-33.3704	-21.799
lingual	Pattern 2	60.4	-27.7449	-33.5703	-21.9196
lingual	Pattern 2	60.5	-27.9076	-33.7723	-22.0428
lingual	Pattern 2	60.6	-28.0727	-33.9765	-22.1689
lingual	Pattern 2	60.7	-28.2402	-34.1825	-22.2978
lingual	Pattern 2	60.8	-28.4101	-34.3903	-22.4299
lingual	Pattern 2	60.9	-28.5824	-34.5998	-22.5651
lingual	Pattern 2	61	-28.7572	-34.8108	-22.7036
lingual	Pattern 2	61.1	-28.9344	-35.0233	-22.8455
lingual	Pattern 2	61.2	-29.114	-35.2371	-22.9909
lingual	Pattern 2	61.3	-29.2961	-35.4522	-23.1399
lingual	Pattern 2	61.4	-29.4805	-35.6685	-23.2926
lingual	Pattern 2	61.5	-29.6674	-35.8859	-23.449
lingual	Pattern 2	61.6	-29.8567	-36.1042	-23.6092
lingual	Pattern 2	61.7	-30.0485	-36.3236	-23.7734
lingual	Pattern 2	61.8	-30.2426	-36.5438	-23.9414
lingual	Pattern 2	61.9	-30.4392	-36.7649	-24.1135
lingual	Pattern 2	62	-30.6382	-36.9868	-24.2897
lingual	Pattern 2	62.1	-30.8396	-37.2094	-24.4699
lingual	Pattern 2	62.2	-31.0435	-37.4327	-24.6543
lingual	Pattern 2	62.3	-31.2498	-37.6566	-24.8429
lingual	Pattern 2	62.4	-31.4585	-37.8812	-25.0357
lingual	Pattern 2	62.5	-31.6696	-38.1063	-25.2328
lingual	Pattern 2	62.6	-31.8831	-38.3321	-25.4342
lingual	Pattern 2	62.7	-32.0991	-38.5583	-25.6399
lingual	Pattern 2	62.8	-32.3175	-38.7851	-25.8499
lingual	Pattern 2	62.9	-32.5383	-39.0124	-26.0642
lingual	Pattern 2	63	-32.7615	-39.2401	-26.2829
lingual	Pattern 2	63.1	-32.9872	-39.4684	-26.506
lingual	Pattern 2	63.2	-33.2153	-39.6971	-26.7335
lingual	Pattern 2	63.3	-33.4458	-39.9262	-26.9653
lingual	Pattern 2	63.4	-33.6787	-40.1559	-27.2015
lingual	Pattern 2	63.5	-33.9141	-40.3859	-27.4422
lingual	Pattern 2	63.6	-34.1518	-40.6165	-27.6872
lingual	Pattern 2	63.7	-34.392	-40.8475	-27.9365
lingual	Pattern 2	63.8	-34.6346	-41.079	-28.1903
lingual	Pattern 2	63.9	-34.8797	-41.3111	-28.4483
lingual	Pattern 2	64	-35.1272	-41.5436	-28.7107
lingual	Pattern 2	64.1	-35.377	-41.7766	-28.9774
lingual	Pattern 2	64.2	-35.6294	-42.0103	-29.2484
lingual	Pattern 2	64.3	-35.8841	-42.2445	-29.5237
lingual	Pattern 2	64.4	-36.1413	-42.4793	-29.8032
lingual	Pattern 2	64.5	-36.4008	-42.7149	-30.0868
lingual	Pattern 2	64.6	-36.6628	-42.9511	-30.3746
lingual	Pattern 2	64.7	-36.9273	-43.188	-30.6665
lingual	Pattern 2	64.8	-37.1941	-43.4258	-30.9625
lingual	Pattern 2	64.9	-37.4634	-43.6643	-31.2625
lingual	Pattern 2	65	-37.7351	-43.9038	-31.5664
lingual	Pattern 2	65.1	-38.0092	-44.1443	-31.8741
lingual	Pattern 2	65.2	-38.2858	-44.3858	-32.1857
lingual	Pattern 2	65.3	-38.5647	-44.6284	-32.501
lingual	Pattern 2	65.4	-38.8461	-44.8722	-32.82
lingual	Pattern 2	65.5	-39.1299	-45.1173	-33.1425
lingual	Pattern 2	65.6	-39.4162	-45.3638	-33.4685
lingual	Pattern 2	65.7	-39.7048	-45.6118	-33.7979
lingual	Pattern 2	65.8	-39.9959	-45.8613	-34.1305
lingual	Pattern 2	65.9	-40.2894	-46.1126	-34.4663
lingual	Pattern 2	66	-40.5854	-46.3657	-34.8051
lingual	Pattern 2	66.1	-40.8837	-46.6207	-35.1467
lingual	Pattern 2	66.2	-41.1845	-46.8779	-35.4911
lingual	Pattern 2	66.3	-41.4877	-47.1374	-35.838
lingual	Pattern 2	66.4	-41.7933	-47.3993	-36.1874
lingual	Pattern 2	66.5	-42.1014	-47.6638	-36.5389
lingual	Pattern 2	66.6	-42.4118	-47.9311	-36.8925
lingual	Pattern 2	66.7	-42.7247	-48.2014	-37.248
lingual	Pattern 2	66.8	-43.04	-48.475	-37.6051
lingual	Pattern 2	66.9	-43.3578	-48.752	-37.9636
lingual	Pattern 2	67	-43.6779	-49.0327	-38.3232
lingual	Pattern 2	67.1	-44.0005	-49.3173	-38.6838
lingual	Pattern 2	67.2	-44.3255	-49.6061	-39.045
lingual	Pattern 2	67.3	-44.653	-49.8993	-39.4066
lingual	Pattern 2	67.4	-44.9828	-50.1973	-39.7683
lingual	Pattern 2	67.5	-45.3151	-50.5004	-40.1299
lingual	Pattern 2	67.6	-45.6498	-50.8087	-40.4909
lingual	Pattern 2	67.7	-45.9869	-51.1228	-40.8511
lingual	Pattern 2	67.8	-46.3265	-51.4428	-41.2102
lingual	Pattern 2	67.9	-46.6684	-51.7691	-41.5678
lingual	Pattern 2	68	-47.0128	-52.102	-41.9237
lingual	Pattern 2	68.1	-47.3597	-52.4418	-42.2775
lingual	Pattern 2	68.2	-47.7089	-52.7889	-42.6288
lingual	Pattern 2	68.3	-48.0606	-53.1436	-42.9775
lingual	Pattern 2	68.4	-48.4146	-53.5062	-43.3231
lingual	Pattern 2	68.5	-48.7712	-53.8769	-43.6655
lingual	Pattern 2	68.6	-49.1301	-54.256	-44.0042
lingual	Pattern 2	68.7	-49.4914	-54.6438	-44.3391
lingual	Pattern 2	68.8	-49.8552	-55.0406	-44.6699
lingual	Pattern 2	68.9	-50.2214	-55.4465	-44.9964
lingual	Pattern 2	69	-50.5901	-55.8617	-45.3184
lingual	Pattern 2	69.1	-50.9611	-56.2864	-45.6358
lingual	Pattern 2	69.2	-51.3346	-56.7207	-45.9485
lingual	Pattern 2	69.3	-51.7105	-57.1647	-46.2563
lingual	Pattern 2	69.4	-52.0876	-57.6171	-46.5581
lingual	Pattern 2	69.5	-52.462	-58.0731	-46.8509
lingual	Pattern 2	69.6	-52.8335	-58.5319	-47.135
lingual	Pattern 2	69.7	-53.2019	-58.9932	-47.4107
lingual	Pattern 2	69.8	-53.5674	-59.4563	-47.6785
lingual	Pattern 2	69.9	-53.9299	-59.921	-47.9388
lingual	Pattern 2	70	-54.2894	-60.3869	-48.192
lingual	Pattern 2	70.1	-54.646	-60.8535	-48.4384
lingual	Pattern 2	70.2	-54.9995	-61.3206	-48.6784
lingual	Pattern 2	70.3	-55.3501	-61.7877	-48.9124
lingual	Pattern 2	70.4	-55.6977	-62.2546	-49.1407
lingual	Pattern 2	70.5	-56.0423	-62.721	-49.3635
lingual	Pattern 2	70.6	-56.3839	-63.1866	-49.5812
lingual	Pattern 2	70.7	-56.7225	-63.6511	-49.7939
lingual	Pattern 2	70.8	-57.0582	-64.1144	-50.002
lingual	Pattern 2	70.9	-57.3908	-64.5761	-50.2056
lingual	Pattern 2	71	-57.7205	-65.0361	-50.4049
lingual	Pattern 2	71.1	-58.0472	-65.4942	-50.6002
lingual	Pattern 2	71.2	-58.3709	-65.9502	-50.7916
lingual	Pattern 2	71.3	-58.6916	-66.404	-50.9793
lingual	Pattern 2	71.4	-59.0094	-66.8554	-51.1634
lingual	Pattern 2	71.5	-59.3241	-67.3042	-51.3441
lingual	Pattern 2	71.6	-59.6359	-67.7504	-51.5215
lingual	Pattern 2	71.7	-59.9447	-68.1937	-51.6957
lingual	Pattern 2	71.8	-60.2505	-68.6342	-51.8669
lingual	Pattern 2	71.9	-60.5534	-69.0716	-52.0351
lingual	Pattern 2	72	-60.8532	-69.506	-52.2004
lingual	Pattern 2	72.1	-61.1501	-69.9371	-52.363
lingual	Pattern 2	72.2	-61.444	-70.365	-52.5229
lingual	Pattern 2	72.3	-61.7348	-70.7895	-52.6802
lingual	Pattern 2	72.4	-62.0228	-71.2106	-52.8349
lingual	Pattern 2	72.5	-62.3077	-71.6282	-52.9872
lingual	Pattern 2	72.6	-62.5896	-72.0422	-53.137
lingual	Pattern 2	72.7	-62.8686	-72.4526	-53.2845
lingual	Pattern 2	72.8	-63.1446	-72.8594	-53.4297
lingual	Pattern 2	72.9	-63.4176	-73.2624	-53.5727
lingual	Pattern 2	73	-63.6876	-73.6616	-53.7135
lingual	Pattern 2	73.1	-63.9546	-74.0571	-53.8521
lingual	Pattern 2	73.2	-64.2186	-74.4486	-53.9886
lingual	Pattern 2	73.3	-64.4797	-74.8363	-54.1231
lingual	Pattern 2	73.4	-64.7378	-75.22	-54.2555
lingual	Pattern 2	73.5	-64.9929	-75.5998	-54.3859
lingual	Pattern 2	73.6	-65.245	-75.9756	-54.5144
lingual	Pattern 2	73.7	-65.4941	-76.3473	-54.6409
lingual	Pattern 2	73.8	-65.7402	-76.715	-54.7655
lingual	Pattern 2	73.9	-65.9834	-77.0786	-54.8882
lingual	Pattern 2	74	-66.2236	-77.4381	-55.0091
lingual	Pattern 2	74.1	-66.4608	-77.7934	-55.1281
lingual	Pattern 2	74.2	-66.695	-78.1446	-55.2453
lingual	Pattern 2	74.3	-66.9262	-78.4916	-55.3608
lingual	Pattern 2	74.4	-67.1544	-78.8344	-55.4744
lingual	Pattern 2	74.5	-67.3797	-79.173	-55.5864
lingual	Pattern 2	74.6	-67.602	-79.5074	-55.6965
lingual	Pattern 2	74.7	-67.8213	-79.8375	-55.805
lingual	Pattern 2	74.8	-68.0376	-80.1633	-55.9118
lingual	Pattern 2	74.9	-68.2509	-80.4849	-56.0169
lingual	Pattern 2	75	-68.4612	-80.8022	-56.1203
lingual	Pattern 2	75.1	-68.6686	-81.1151	-56.2221
lingual	Pattern 2	75.2	-68.873	-81.4237	-56.3222
lingual	Pattern 2	75.3	-69.0743	-81.728	-56.4207
lingual	Pattern 2	75.4	-69.2727	-82.028	-56.5175
lingual	Pattern 2	75.5	-69.4682	-82.3236	-56.6128
lingual	Pattern 2	75.6	-69.6606	-82.6148	-56.7064
lingual	Pattern 2	75.7	-69.8501	-82.9016	-56.7985
lingual	Pattern 2	75.8	-70.0365	-83.1841	-56.889
lingual	Pattern 2	75.9	-70.22	-83.4621	-56.9779
lingual	Pattern 2	76	-70.4005	-83.7358	-57.0653
lingual	Pattern 2	76.1	-70.578	-84.005	-57.1511
lingual	Pattern 2	76.2	-70.7526	-84.2698	-57.2353
lingual	Pattern 2	76.3	-70.9241	-84.5302	-57.318
lingual	Pattern 2	76.4	-71.0927	-84.7862	-57.3992
lingual	Pattern 2	76.5	-71.2583	-85.0377	-57.4789
lingual	Pattern 2	76.6	-71.4209	-85.2848	-57.557
lingual	Pattern 2	76.7	-71.5805	-85.5274	-57.6336
lingual	Pattern 2	76.8	-71.7371	-85.7655	-57.7088
lingual	Pattern 2	76.9	-71.8908	-85.9992	-57.7824
lingual	Pattern 2	77	-72.0415	-86.2284	-57.8545
lingual	Pattern 2	77.1	-72.1892	-86.4532	-57.9251
lingual	Pattern 2	77.2	-72.3339	-86.6735	-57.9943
lingual	Pattern 2	77.3	-72.4756	-86.8892	-58.0619
lingual	Pattern 2	77.4	-72.6143	-87.1005	-58.1281
lingual	Pattern 2	77.5	-72.7501	-87.3073	-58.1928
lingual	Pattern 2	77.6	-72.8828	-87.5096	-58.256
lingual	Pattern 2	77.7	-73.0126	-87.7074	-58.3178
lingual	Pattern 2	77.8	-73.1394	-87.9007	-58.3781
lingual	Pattern 2	77.9	-73.2632	-88.0895	-58.437
lingual	Pattern 2	78	-73.3841	-88.2738	-58.4944
lingual	Pattern 2	78.1	-73.5019	-88.4535	-58.5503
lingual	Pattern 2	78.2	-73.6168	-88.6287	-58.6048
lingual	Pattern 2	78.3	-73.7287	-88.7995	-58.6578
lingual	Pattern 2	78.4	-73.8376	-88.9657	-58.7094
lingual	Pattern 2	78.5	-73.9435	-89.1273	-58.7596
lingual	Pattern 2	78.6	-74.0464	-89.2845	-58.8083
lingual	Pattern 2	78.7	-74.1463	-89.4371	-58.8556
lingual	Pattern 2	78.8	-74.2433	-89.5852	-58.9015
lingual	Pattern 2	78.9	-74.3373	-89.7287	-58.9459
lingual	Pattern 2	79	-74.4283	-89.8677	-58.9889
lingual	Pattern 2	79.1	-74.5163	-90.0022	-59.0305
lingual	Pattern 2	79.2	-74.6013	-90.1321	-59.0706
lingual	Pattern 2	79.3	-74.6834	-90.2575	-59.1093
lingual	Pattern 2	79.4	-74.7624	-90.3783	-59.1466
lingual	Pattern 2	79.5	-74.8385	-90.4946	-59.1825
lingual	Pattern 2	79.6	-74.9116	-90.6063	-59.2169
lingual	Pattern 2	79.7	-74.9817	-90.7135	-59.25
lingual	Pattern 2	79.8	-75.0489	-90.8161	-59.2816
lingual	Pattern 2	79.9	-75.113	-90.9142	-59.3118
lingual	Pattern 2	80	-75.1742	-91.0077	-59.3406
lingual	Pattern 2	80.1	-75.2324	-91.0967	-59.368
lingual	Pattern 2	80.2	-75.2876	-91.1811	-59.394
lingual	Pattern 2	80.3	-75.3398	-91.261	-59.4185
lingual	Pattern 2	80.4	-75.389	-91.3363	-59.4417
lingual	Pattern 2	80.5	-75.4352	-91.407	-59.4634
lingual	Pattern 2	80.6	-75.4785	-91.4732	-59.4838
lingual	Pattern 2	80.7	-75.5188	-91.5348	-59.5027
lingual	Pattern 2	80.8	-75.5561	-91.5919	-59.5202
lingual	Pattern 2	80.9	-75.5904	-91.6444	-59.5364
lingual	Pattern 2	81	-75.6217	-91.6923	-59.5511
lingual	Pattern 2	81.1	-75.6501	-91.7357	-59.5644
lingual	Pattern 2	81.2	-75.6754	-91.7745	-59.5763
lingual	Pattern 2	81.3	-75.6978	-91.8087	-59.5868
lingual	Pattern 2	81.4	-75.7172	-91.8384	-59.5959
lingual	Pattern 2	81.5	-75.7336	-91.8635	-59.6036
lingual	Pattern 2	81.6	-75.747	-91.8841	-59.61
lingual	Pattern 2	81.7	-75.7575	-91.9001	-59.6149
lingual	Pattern 2	81.8	-75.7649	-91.9115	-59.6184
lingual	Pattern 2	81.9	-75.7694	-91.9183	-59.6205
lingual	Pattern 2	82	-75.7709	-91.9206	-59.6212
parahippocompal	Pattern 1	44	1.55508	-3.28865	6.39881
parahippocompal	Pattern 1	44.1	1.55508	-3.28865	6.39881
parahippocompal	Pattern 1	44.2	1.55508	-3.28865	6.39881
parahippocompal	Pattern 1	44.3	1.55508	-3.28865	6.39881
parahippocompal	Pattern 1	44.4	1.55508	-3.28865	6.39881
parahippocompal	Pattern 1	44.5	1.55508	-3.28865	6.39881
parahippocompal	Pattern 1	44.6	1.55508	-3.28865	6.39881
parahippocompal	Pattern 1	44.7	1.55508	-3.28865	6.39881
parahippocompal	Pattern 1	44.8	1.55508	-3.28865	6.39881
parahippocompal	Pattern 1	44.9	1.55508	-3.28865	6.39881
parahippocompal	Pattern 1	45	1.55508	-3.28865	6.39881
parahippocompal	Pattern 1	45.1	1.55464	-3.28884	6.39811
parahippocompal	Pattern 1	45.2	1.55331	-3.28941	6.39604
parahippocompal	Pattern 1	45.3	1.55111	-3.29035	6.39258
parahippocompal	Pattern 1	45.4	1.54803	-3.29167	6.38773
parahippocompal	Pattern 1	45.5	1.54407	-3.29336	6.3815
parahippocompal	Pattern 1	45.6	1.53922	-3.29544	6.37388
parahippocompal	Pattern 1	45.7	1.5335	-3.29789	6.36488
parahippocompal	Pattern 1	45.8	1.52689	-3.30071	6.3545
parahippocompal	Pattern 1	45.9	1.5194	-3.30392	6.34273
parahippocompal	Pattern 1	46	1.51104	-3.3075	6.32957
parahippocompal	Pattern 1	46.1	1.50179	-3.31146	6.31503
parahippocompal	Pattern 1	46.2	1.49166	-3.3158	6.29911
parahippocompal	Pattern 1	46.3	1.48065	-3.32051	6.28181
parahippocompal	Pattern 1	46.4	1.46876	-3.32561	6.26312
parahippocompal	Pattern 1	46.5	1.45598	-3.33108	6.24305
parahippocompal	Pattern 1	46.6	1.44233	-3.33693	6.22159
parahippocompal	Pattern 1	46.7	1.4278	-3.34316	6.19875
parahippocompal	Pattern 1	46.8	1.41238	-3.34976	6.17453
parahippocompal	Pattern 1	46.9	1.39609	-3.35675	6.14893
parahippocompal	Pattern 1	47	1.37891	-3.36412	6.12194
parahippocompal	Pattern 1	47.1	1.36085	-3.37187	6.09357
parahippocompal	Pattern 1	47.2	1.34192	-3.37999	6.06383
parahippocompal	Pattern 1	47.3	1.3221	-3.3885	6.0327
parahippocompal	Pattern 1	47.4	1.3014	-3.39739	6.00019
parahippocompal	Pattern 1	47.5	1.27982	-3.40666	5.9663
parahippocompal	Pattern 1	47.6	1.25736	-3.41631	5.93102
parahippocompal	Pattern 1	47.7	1.23402	-3.42634	5.89437
parahippocompal	Pattern 1	47.8	1.20979	-3.43676	5.85635
parahippocompal	Pattern 1	47.9	1.18469	-3.44756	5.81694
parahippocompal	Pattern 1	48	1.15871	-3.45874	5.77615
parahippocompal	Pattern 1	48.1	1.13184	-3.47031	5.73399
parahippocompal	Pattern 1	48.2	1.10409	-3.48226	5.69045
parahippocompal	Pattern 1	48.3	1.07547	-3.4946	5.64554
parahippocompal	Pattern 1	48.4	1.04596	-3.50733	5.59924
parahippocompal	Pattern 1	48.5	1.01557	-3.52044	5.55158
parahippocompal	Pattern 1	48.6	0.984301	-3.53393	5.50254
parahippocompal	Pattern 1	48.7	0.952151	-3.54782	5.45212
parahippocompal	Pattern 1	48.8	0.91912	-3.5621	5.40034
parahippocompal	Pattern 1	48.9	0.885208	-3.57676	5.34718
parahippocompal	Pattern 1	49	0.850416	-3.59182	5.29265
parahippocompal	Pattern 1	49.1	0.814743	-3.60726	5.23675
parahippocompal	Pattern 1	49.2	0.778188	-3.6231	5.17948
parahippocompal	Pattern 1	49.3	0.740753	-3.63933	5.12084
parahippocompal	Pattern 1	49.4	0.702437	-3.65596	5.06083
parahippocompal	Pattern 1	49.5	0.66324	-3.67298	4.99946
parahippocompal	Pattern 1	49.6	0.623163	-3.6904	4.93672
parahippocompal	Pattern 1	49.7	0.582204	-3.70822	4.87262
parahippocompal	Pattern 1	49.8	0.540365	-3.72643	4.80716
parahippocompal	Pattern 1	49.9	0.497645	-3.74504	4.74033
parahippocompal	Pattern 1	50	0.454044	-3.76406	4.67215
parahippocompal	Pattern 1	50.1	0.409562	-3.78348	4.6026
parahippocompal	Pattern 1	50.2	0.3642	-3.8033	4.5317
parahippocompal	Pattern 1	50.3	0.317956	-3.82353	4.45944
parahippocompal	Pattern 1	50.4	0.270832	-3.84417	4.38583
parahippocompal	Pattern 1	50.5	0.222827	-3.86521	4.31087
parahippocompal	Pattern 1	50.6	0.173941	-3.88667	4.23455
parahippocompal	Pattern 1	50.7	0.124174	-3.90854	4.15689
parahippocompal	Pattern 1	50.8	0.0735271	-3.93082	4.07787
parahippocompal	Pattern 1	50.9	0.0219987	-3.95352	3.99752
parahippocompal	Pattern 1	51	-0.0304105	-3.97664	3.91582
parahippocompal	Pattern 1	51.1	-0.0837006	-4.00018	3.83278
parahippocompal	Pattern 1	51.2	-0.137871	-4.02414	3.7484
parahippocompal	Pattern 1	51.3	-0.192923	-4.04854	3.66269
parahippocompal	Pattern 1	51.4	-0.248855	-4.07335	3.57564
parahippocompal	Pattern 1	51.5	-0.305669	-4.09861	3.48727
parahippocompal	Pattern 1	51.6	-0.363363	-4.12429	3.39757
parahippocompal	Pattern 1	51.7	-0.421938	-4.15042	3.30654
parahippocompal	Pattern 1	51.8	-0.481393	-4.17698	3.21419
parahippocompal	Pattern 1	51.9	-0.54173	-4.20399	3.12053
parahippocompal	Pattern 1	52	-0.602948	-4.23145	3.02555
parahippocompal	Pattern 1	52.1	-0.665046	-4.25936	2.92927
parahippocompal	Pattern 1	52.2	-0.728025	-4.28772	2.83167
parahippocompal	Pattern 1	52.3	-0.791885	-4.31655	2.73278
parahippocompal	Pattern 1	52.4	-0.856626	-4.34584	2.63259
parahippocompal	Pattern 1	52.5	-0.922247	-4.37561	2.53111
parahippocompal	Pattern 1	52.6	-0.98875	-4.40584	2.42835
parahippocompal	Pattern 1	52.7	-1.05613	-4.43656	2.3243
parahippocompal	Pattern 1	52.8	-1.1244	-4.46777	2.21898
parahippocompal	Pattern 1	52.9	-1.19354	-4.49947	2.11239
parahippocompal	Pattern 1	53	-1.26357	-4.53167	2.00454
parahippocompal	Pattern 1	53.1	-1.33447	-4.56438	1.89543
parahippocompal	Pattern 1	53.2	-1.40626	-4.5976	1.78508
parahippocompal	Pattern 1	53.3	-1.47893	-4.63135	1.67349
parahippocompal	Pattern 1	53.4	-1.55248	-4.66562	1.56067
parahippocompal	Pattern 1	53.5	-1.62691	-4.70044	1.44662
parahippocompal	Pattern 1	53.6	-1.70222	-4.73581	1.33137
parahippocompal	Pattern 1	53.7	-1.77841	-4.77174	1.21492
parahippocompal	Pattern 1	53.8	-1.85548	-4.80824	1.09727
parahippocompal	Pattern 1	53.9	-1.93344	-4.84533	0.978454
parahippocompal	Pattern 1	54	-2.01227	-4.88301	0.85847
parahippocompal	Pattern 1	54.1	-2.09198	-4.92131	0.737336
parahippocompal	Pattern 1	54.2	-2.17258	-4.96023	0.615068
parahippocompal	Pattern 1	54.3	-2.25406	-4.99979	0.49168
parahippocompal	Pattern 1	54.4	-2.33641	-5.04002	0.367191
parahippocompal	Pattern 1	54.5	-2.41965	-5.08092	0.241619
parahippocompal	Pattern 1	54.6	-2.50377	-5.12253	0.114985
parahippocompal	Pattern 1	54.7	-2.58877	-5.16485	-0.0126892
parahippocompal	Pattern 1	54.8	-2.67465	-5.20792	-0.14138
parahippocompal	Pattern 1	54.9	-2.76141	-5.25176	-0.271062
parahippocompal	Pattern 1	55	-2.84905	-5.2964	-0.401708
parahippocompal	Pattern 1	55.1	-2.93758	-5.34187	-0.533287
parahippocompal	Pattern 1	55.2	-3.02698	-5.3882	-0.665767
parahippocompal	Pattern 1	55.3	-3.11727	-5.43542	-0.799112
parahippocompal	Pattern 1	55.4	-3.20843	-5.48358	-0.933285
parahippocompal	Pattern 1	55.5	-3.30048	-5.53271	-1.06824
parahippocompal	Pattern 1	55.6	-3.39341	-5.58287	-1.20394
parahippocompal	Pattern 1	55.7	-3.48721	-5.6341	-1.34033
parahippocompal	Pattern 1	55.8	-3.5819	-5.68645	-1.47735
parahippocompal	Pattern 1	55.9	-3.67747	-5.73999	-1.61496
parahippocompal	Pattern 1	56	-3.77392	-5.79477	-1.75308
parahippocompal	Pattern 1	56.1	-3.87125	-5.85087	-1.89164
parahippocompal	Pattern 1	56.2	-3.96947	-5.90835	-2.03058
parahippocompal	Pattern 1	56.3	-4.06856	-5.96732	-2.1698
parahippocompal	Pattern 1	56.4	-4.16853	-6.02784	-2.30923
parahippocompal	Pattern 1	56.5	-4.26939	-6.09002	-2.44875
parahippocompal	Pattern 1	56.6	-4.37112	-6.15396	-2.58828
parahippocompal	Pattern 1	56.7	-4.47374	-6.21978	-2.7277
parahippocompal	Pattern 1	56.8	-4.57724	-6.28759	-2.86688
parahippocompal	Pattern 1	56.9	-4.68161	-6.35753	-3.0057
parahippocompal	Pattern 1	57	-4.78687	-6.42973	-3.14402
parahippocompal	Pattern 1	57.1	-4.89301	-6.50433	-3.28169
parahippocompal	Pattern 1	57.2	-5.00003	-6.58151	-3.41856
parahippocompal	Pattern 1	57.3	-5.10793	-6.66141	-3.55446
parahippocompal	Pattern 1	57.4	-5.21644	-6.744	-3.68889
parahippocompal	Pattern 1	57.5	-5.32468	-6.82874	-3.82062
parahippocompal	Pattern 1	57.6	-5.43257	-6.91557	-3.94957
parahippocompal	Pattern 1	57.7	-5.54012	-7.00447	-4.07577
parahippocompal	Pattern 1	57.8	-5.64733	-7.09543	-4.19924
parahippocompal	Pattern 1	57.9	-5.7542	-7.18839	-4.32001
parahippocompal	Pattern 1	58	-5.86072	-7.28331	-4.43813
parahippocompal	Pattern 1	58.1	-5.9669	-7.38013	-4.55367
parahippocompal	Pattern 1	58.2	-6.07274	-7.47878	-4.66669
parahippocompal	Pattern 1	58.3	-6.17823	-7.57918	-4.77729
parahippocompal	Pattern 1	58.4	-6.28338	-7.68124	-4.88553
parahippocompal	Pattern 1	58.5	-6.38819	-7.78486	-4.99153
parahippocompal	Pattern 1	58.6	-6.49266	-7.88994	-5.09538
parahippocompal	Pattern 1	58.7	-6.59679	-7.99638	-5.1972
parahippocompal	Pattern 1	58.8	-6.70057	-8.10405	-5.29708
parahippocompal	Pattern 1	58.9	-6.80401	-8.21286	-5.39516
parahippocompal	Pattern 1	59	-6.90711	-8.32267	-5.49154
parahippocompal	Pattern 1	59.1	-7.00986	-8.43338	-5.58633
parahippocompal	Pattern 1	59.2	-7.11227	-8.54488	-5.67966
parahippocompal	Pattern 1	59.3	-7.21434	-8.65705	-5.77163
parahippocompal	Pattern 1	59.4	-7.31607	-8.76979	-5.86235
parahippocompal	Pattern 1	59.5	-7.41745	-8.88299	-5.95192
parahippocompal	Pattern 1	59.6	-7.51849	-8.99654	-6.04045
parahippocompal	Pattern 1	59.7	-7.61919	-9.11036	-6.12803
parahippocompal	Pattern 1	59.8	-7.71955	-9.22434	-6.21476
parahippocompal	Pattern 1	59.9	-7.81956	-9.33841	-6.30072
parahippocompal	Pattern 1	60	-7.91923	-9.45248	-6.38599
parahippocompal	Pattern 1	60.1	-8.01856	-9.56647	-6.47066
parahippocompal	Pattern 1	60.2	-8.11755	-9.6803	-6.5548
parahippocompal	Pattern 1	60.3	-8.21619	-9.79391	-6.63847
parahippocompal	Pattern 1	60.4	-8.3145	-9.90724	-6.72175
parahippocompal	Pattern 1	60.5	-8.41245	-10.0202	-6.80468
parahippocompal	Pattern 1	60.6	-8.51007	-10.1328	-6.88734
parahippocompal	Pattern 1	60.7	-8.60734	-10.2449	-6.96976
parahippocompal	Pattern 1	60.8	-8.70427	-10.3565	-7.05201
parahippocompal	Pattern 1	60.9	-8.80086	-10.4676	-7.13411
parahippocompal	Pattern 1	61	-8.89711	-10.5781	-7.21613
parahippocompal	Pattern 1	61.1	-8.99301	-10.6879	-7.29808
parahippocompal	Pattern 1	61.2	-9.08857	-10.7971	-7.38002
parahippocompal	Pattern 1	61.3	-9.18379	-10.9056	-7.46198
parahippocompal	Pattern 1	61.4	-9.27867	-11.0134	-7.54398
parahippocompal	Pattern 1	61.5	-9.3732	-11.1203	-7.62605
parahippocompal	Pattern 1	61.6	-9.46739	-11.2266	-7.70822
parahippocompal	Pattern 1	61.7	-9.56124	-11.332	-7.79052
parahippocompal	Pattern 1	61.8	-9.65474	-11.4365	-7.87297
parahippocompal	Pattern 1	61.9	-9.7479	-11.5402	-7.95558
parahippocompal	Pattern 1	62	-9.84072	-11.6431	-8.03838
parahippocompal	Pattern 1	62.1	-9.9332	-11.745	-8.12138
parahippocompal	Pattern 1	62.2	-10.0253	-11.8461	-8.2046
parahippocompal	Pattern 1	62.3	-10.1171	-11.9462	-8.28806
parahippocompal	Pattern 1	62.4	-10.2086	-12.0454	-8.37176
parahippocompal	Pattern 1	62.5	-10.2997	-12.1437	-8.45572
parahippocompal	Pattern 1	62.6	-10.3905	-12.241	-8.53995
parahippocompal	Pattern 1	62.7	-10.4809	-12.3373	-8.62446
parahippocompal	Pattern 1	62.8	-10.571	-12.4327	-8.70926
parahippocompal	Pattern 1	62.9	-10.6607	-12.527	-8.79434
parahippocompal	Pattern 1	63	-10.7501	-12.6204	-8.87973
parahippocompal	Pattern 1	63.1	-10.8391	-12.7128	-8.96543
parahippocompal	Pattern 1	63.2	-10.9278	-12.8043	-9.05143
parahippocompal	Pattern 1	63.3	-11.0162	-12.8947	-9.13775
parahippocompal	Pattern 1	63.4	-11.1042	-12.9841	-9.22438
parahippocompal	Pattern 1	63.5	-11.1919	-13.0725	-9.31133
parahippocompal	Pattern 1	63.6	-11.2793	-13.1599	-9.3986
parahippocompal	Pattern 1	63.7	-11.3663	-13.2463	-9.48618
parahippocompal	Pattern 1	63.8	-11.4529	-13.3317	-9.57408
parahippocompal	Pattern 1	63.9	-11.5392	-13.4161	-9.6623
parahippocompal	Pattern 1	64	-11.6252	-13.4995	-9.75083
parahippocompal	Pattern 1	64.1	-11.7108	-13.582	-9.83966
parahippocompal	Pattern 1	64.2	-11.7961	-13.6634	-9.9288
parahippocompal	Pattern 1	64.3	-11.881	-13.7438	-10.0182
parahippocompal	Pattern 1	64.4	-11.9656	-13.8233	-10.108
parahippocompal	Pattern 1	64.5	-12.0499	-13.9018	-10.198
parahippocompal	Pattern 1	64.6	-12.1338	-13.9793	-10.2883
parahippocompal	Pattern 1	64.7	-12.2174	-14.0559	-10.3788
parahippocompal	Pattern 1	64.8	-12.3006	-14.1316	-10.4696
parahippocompal	Pattern 1	64.9	-12.3835	-14.2063	-10.5607
parahippocompal	Pattern 1	65	-12.466	-14.2801	-10.652
parahippocompal	Pattern 1	65.1	-12.5482	-14.353	-10.7435
parahippocompal	Pattern 1	65.2	-12.6301	-14.425	-10.8352
parahippocompal	Pattern 1	65.3	-12.7116	-14.4962	-10.927
parahippocompal	Pattern 1	65.4	-12.7928	-14.5665	-11.0191
parahippocompal	Pattern 1	65.5	-12.8736	-14.636	-11.1112
parahippocompal	Pattern 1	65.6	-12.9541	-14.7047	-11.2035
parahippocompal	Pattern 1	65.7	-13.0342	-14.7726	-11.2959
parahippocompal	Pattern 1	65.8	-13.114	-14.8397	-11.3884
parahippocompal	Pattern 1	65.9	-13.1935	-14.9061	-11.4809
parahippocompal	Pattern 1	66	-13.2726	-14.9719	-11.5734
parahippocompal	Pattern 1	66.1	-13.3514	-15.037	-11.6658
parahippocompal	Pattern 1	66.2	-13.4298	-15.1014	-11.7582
parahippocompal	Pattern 1	66.3	-13.5079	-15.1653	-11.8505
parahippocompal	Pattern 1	66.4	-13.5857	-15.2286	-11.9427
parahippocompal	Pattern 1	66.5	-13.6631	-15.2915	-12.0347
parahippocompal	Pattern 1	66.6	-13.7401	-15.3539	-12.1264
parahippocompal	Pattern 1	66.7	-13.8169	-15.4159	-12.2178
parahippocompal	Pattern 1	66.8	-13.8932	-15.4776	-12.3089
parahippocompal	Pattern 1	66.9	-13.9693	-15.539	-12.3995
parahippocompal	Pattern 1	67	-14.045	-15.6002	-12.4897
parahippocompal	Pattern 1	67.1	-14.1203	-15.6612	-12.5794
parahippocompal	Pattern 1	67.2	-14.1953	-15.7222	-12.6684
parahippocompal	Pattern 1	67.3	-14.27	-15.7832	-12.7567
parahippocompal	Pattern 1	67.4	-14.3443	-15.8443	-12.8443
parahippocompal	Pattern 1	67.5	-14.4183	-15.9056	-12.931
parahippocompal	Pattern 1	67.6	-14.4919	-15.9671	-13.0167
parahippocompal	Pattern 1	67.7	-14.5652	-16.0291	-13.1014
parahippocompal	Pattern 1	67.8	-14.6382	-16.0914	-13.1849
parahippocompal	Pattern 1	67.9	-14.7108	-16.1544	-13.2671
parahippocompal	Pattern 1	68	-14.783	-16.218	-13.348
parahippocompal	Pattern 1	68.1	-14.855	-16.2825	-13.4274
parahippocompal	Pattern 1	68.2	-14.9265	-16.3478	-13.5053
parahippocompal	Pattern 1	68.3	-14.9978	-16.4141	-13.5814
parahippocompal	Pattern 1	68.4	-15.0687	-16.4816	-13.6557
parahippocompal	Pattern 1	68.5	-15.1392	-16.5503	-13.7281
parahippocompal	Pattern 1	68.6	-15.2094	-16.6204	-13.7985
parahippocompal	Pattern 1	68.7	-15.2793	-16.6919	-13.8667
parahippocompal	Pattern 1	68.8	-15.3488	-16.765	-13.9327
parahippocompal	Pattern 1	68.9	-15.418	-16.8397	-13.9964
parahippocompal	Pattern 1	69	-15.4869	-16.9161	-14.0576
parahippocompal	Pattern 1	69.1	-15.5554	-16.9944	-14.1163
parahippocompal	Pattern 1	69.2	-15.6235	-17.0745	-14.1725
parahippocompal	Pattern 1	69.3	-15.6913	-17.1566	-14.2261
parahippocompal	Pattern 1	69.4	-15.7588	-17.2406	-14.277
parahippocompal	Pattern 1	69.5	-15.8259	-17.3267	-14.3251
parahippocompal	Pattern 1	69.6	-15.8927	-17.4148	-14.3706
parahippocompal	Pattern 1	69.7	-15.9591	-17.505	-14.4133
parahippocompal	Pattern 1	69.8	-16.0251	-17.5968	-14.4533
parahippocompal	Pattern 1	69.9	-16.0905	-17.6899	-14.491
parahippocompal	Pattern 1	70	-16.1553	-17.7842	-14.5264
parahippocompal	Pattern 1	70.1	-16.2197	-17.8796	-14.5597
parahippocompal	Pattern 1	70.2	-16.2834	-17.9758	-14.591
parahippocompal	Pattern 1	70.3	-16.3467	-18.0729	-14.6205
parahippocompal	Pattern 1	70.4	-16.4094	-18.1705	-14.6483
parahippocompal	Pattern 1	70.5	-16.4716	-18.2686	-14.6745
parahippocompal	Pattern 1	70.6	-16.5332	-18.3672	-14.6992
parahippocompal	Pattern 1	70.7	-16.5943	-18.466	-14.7226
parahippocompal	Pattern 1	70.8	-16.6548	-18.565	-14.7447
parahippocompal	Pattern 1	70.9	-16.7149	-18.6641	-14.7656
parahippocompal	Pattern 1	71	-16.7743	-18.7633	-14.7854
parahippocompal	Pattern 1	71.1	-16.8333	-18.8624	-14.8042
parahippocompal	Pattern 1	71.2	-16.8917	-18.9613	-14.822
parahippocompal	Pattern 1	71.3	-16.9495	-19.0601	-14.839
parahippocompal	Pattern 1	71.4	-17.0069	-19.1586	-14.8551
parahippocompal	Pattern 1	71.5	-17.0636	-19.2568	-14.8705
parahippocompal	Pattern 1	71.6	-17.1199	-19.3547	-14.8851
parahippocompal	Pattern 1	71.7	-17.1756	-19.4521	-14.8991
parahippocompal	Pattern 1	71.8	-17.2308	-19.5491	-14.9124
parahippocompal	Pattern 1	71.9	-17.2854	-19.6456	-14.9252
parahippocompal	Pattern 1	72	-17.3395	-19.7416	-14.9374
parahippocompal	Pattern 1	72.1	-17.3931	-19.837	-14.9491
parahippocompal	Pattern 1	72.2	-17.4461	-19.9318	-14.9603
parahippocompal	Pattern 1	72.3	-17.4986	-20.026	-14.9711
parahippocompal	Pattern 1	72.4	-17.5505	-20.1196	-14.9814
parahippocompal	Pattern 1	72.5	-17.6019	-20.2125	-14.9914
parahippocompal	Pattern 1	72.6	-17.6528	-20.3046	-15.0009
parahippocompal	Pattern 1	72.7	-17.7031	-20.3961	-15.0101
parahippocompal	Pattern 1	72.8	-17.7529	-20.4868	-15.0189
parahippocompal	Pattern 1	72.9	-17.8021	-20.5768	-15.0275
parahippocompal	Pattern 1	73	-17.8509	-20.666	-15.0357
parahippocompal	Pattern 1	73.1	-17.899	-20.7544	-15.0436
parahippocompal	Pattern 1	73.2	-17.9467	-20.842	-15.0513
parahippocompal	Pattern 1	73.3	-17.9938	-20.9288	-15.0587
parahippocompal	Pattern 1	73.4	-18.0403	-21.0148	-15.0658
parahippocompal	Pattern 1	73.5	-18.0863	-21.0999	-15.0728
parahippocompal	Pattern 1	73.6	-18.1318	-21.1842	-15.0794
parahippocompal	Pattern 1	73.7	-18.1768	-21.2676	-15.0859
parahippocompal	Pattern 1	73.8	-18.2212	-21.3502	-15.0922
parahippocompal	Pattern 1	73.9	-18.265	-21.4318	-15.0983
parahippocompal	Pattern 1	74	-18.3084	-21.5126	-15.1041
parahippocompal	Pattern 1	74.1	-18.3512	-21.5925	-15.1099
parahippocompal	Pattern 1	74.2	-18.3934	-21.6714	-15.1154
parahippocompal	Pattern 1	74.3	-18.4351	-21.7495	-15.1208
parahippocompal	Pattern 1	74.4	-18.4763	-21.8266	-15.126
parahippocompal	Pattern 1	74.5	-18.5169	-21.9029	-15.131
parahippocompal	Pattern 1	74.6	-18.557	-21.9781	-15.136
parahippocompal	Pattern 1	74.7	-18.5966	-22.0525	-15.1407
parahippocompal	Pattern 1	74.8	-18.6356	-22.1259	-15.1454
parahippocompal	Pattern 1	74.9	-18.6741	-22.1984	-15.1499
parahippocompal	Pattern 1	75	-18.7121	-22.2699	-15.1543
parahippocompal	Pattern 1	75.1	-18.7495	-22.3404	-15.1585
parahippocompal	Pattern 1	75.2	-18.7863	-22.41	-15.1627
parahippocompal	Pattern 1	75.3	-18.8227	-22.4787	-15.1667
parahippocompal	Pattern 1	75.4	-18.8585	-22.5463	-15.1706
parahippocompal	Pattern 1	75.5	-18.8937	-22.613	-15.1744
parahippocompal	Pattern 1	75.6	-18.9284	-22.6788	-15.1781
parahippocompal	Pattern 1	75.7	-18.9626	-22.7435	-15.1818
parahippocompal	Pattern 1	75.8	-18.9963	-22.8073	-15.1853
parahippocompal	Pattern 1	75.9	-19.0294	-22.8701	-15.1887
parahippocompal	Pattern 1	76	-19.0619	-22.9319	-15.192
parahippocompal	Pattern 1	76.1	-19.094	-22.9927	-15.1953
parahippocompal	Pattern 1	76.2	-19.1255	-23.0525	-15.1984
parahippocompal	Pattern 1	76.3	-19.1564	-23.1113	-15.2015
parahippocompal	Pattern 1	76.4	-19.1868	-23.1692	-15.2045
parahippocompal	Pattern 1	76.5	-19.2167	-23.226	-15.2074
parahippocompal	Pattern 1	76.6	-19.246	-23.2818	-15.2102
parahippocompal	Pattern 1	76.7	-19.2748	-23.3367	-15.213
parahippocompal	Pattern 1	76.8	-19.3031	-23.3905	-15.2156
parahippocompal	Pattern 1	76.9	-19.3308	-23.4433	-15.2183
parahippocompal	Pattern 1	77	-19.358	-23.4952	-15.2208
parahippocompal	Pattern 1	77.1	-19.3846	-23.546	-15.2233
parahippocompal	Pattern 1	77.2	-19.4107	-23.5958	-15.2257
parahippocompal	Pattern 1	77.3	-19.4363	-23.6446	-15.228
parahippocompal	Pattern 1	77.4	-19.4613	-23.6924	-15.2303
parahippocompal	Pattern 1	77.5	-19.4858	-23.7392	-15.2325
parahippocompal	Pattern 1	77.6	-19.5098	-23.7849	-15.2346
parahippocompal	Pattern 1	77.7	-19.5332	-23.8297	-15.2367
parahippocompal	Pattern 1	77.8	-19.5561	-23.8734	-15.2387
parahippocompal	Pattern 1	77.9	-19.5784	-23.9161	-15.2407
parahippocompal	Pattern 1	78	-19.6002	-23.9578	-15.2426
parahippocompal	Pattern 1	78.1	-19.6215	-23.9985	-15.2444
parahippocompal	Pattern 1	78.2	-19.6422	-24.0382	-15.2462
parahippocompal	Pattern 1	78.3	-19.6624	-24.0768	-15.2479
parahippocompal	Pattern 1	78.4	-19.682	-24.1144	-15.2496
parahippocompal	Pattern 1	78.5	-19.7011	-24.151	-15.2512
parahippocompal	Pattern 1	78.6	-19.7197	-24.1866	-15.2528
parahippocompal	Pattern 1	78.7	-19.7377	-24.2211	-15.2543
parahippocompal	Pattern 1	78.8	-19.7552	-24.2547	-15.2558
parahippocompal	Pattern 1	78.9	-19.7722	-24.2872	-15.2572
parahippocompal	Pattern 1	79	-19.7886	-24.3186	-15.2586
parahippocompal	Pattern 1	79.1	-19.8045	-24.3491	-15.2599
parahippocompal	Pattern 1	79.2	-19.8198	-24.3785	-15.2611
parahippocompal	Pattern 1	79.3	-19.8346	-24.4069	-15.2623
parahippocompal	Pattern 1	79.4	-19.8489	-24.4342	-15.2635
parahippocompal	Pattern 1	79.5	-19.8626	-24.4606	-15.2646
parahippocompal	Pattern 1	79.6	-19.8758	-24.4859	-15.2657
parahippocompal	Pattern 1	79.7	-19.8884	-24.5101	-15.2667
parahippocompal	Pattern 1	79.8	-19.9005	-24.5334	-15.2677
parahippocompal	Pattern 1	79.9	-19.9121	-24.5556	-15.2686
parahippocompal	Pattern 1	80	-19.9232	-24.5768	-15.2695
parahippocompal	Pattern 1	80.1	-19.9336	-24.5969	-15.2704
parahippocompal	Pattern 1	80.2	-19.9436	-24.616	-15.2712
parahippocompal	Pattern 1	80.3	-19.953	-24.6341	-15.2719
parahippocompal	Pattern 1	80.4	-19.9619	-24.6512	-15.2726
parahippocompal	Pattern 1	80.5	-19.9703	-24.6672	-15.2733
parahippocompal	Pattern 1	80.6	-19.9781	-24.6822	-15.2739
parahippocompal	Pattern 1	80.7	-19.9853	-24.6962	-15.2745
parahippocompal	Pattern 1	80.8	-19.9921	-24.7091	-15.275
parahippocompal	Pattern 1	80.9	-19.9982	-24.721	-15.2755
parahippocompal	Pattern 1	81	-20.0039	-24.7318	-15.2759
parahippocompal	Pattern 1	81.1	-20.009	-24.7417	-15.2764
parahippocompal	Pattern 1	81.2	-20.0136	-24.7505	-15.2767
parahippocompal	Pattern 1	81.3	-20.0176	-24.7582	-15.277
parahippocompal	Pattern 1	81.4	-20.0211	-24.7649	-15.2773
parahippocompal	Pattern 1	81.5	-20.0241	-24.7706	-15.2775
parahippocompal	Pattern 1	81.6	-20.0265	-24.7753	-15.2777
parahippocompal	Pattern 1	81.7	-20.0284	-24.7789	-15.2779
parahippocompal	Pattern 1	81.8	-20.0297	-24.7815	-15.278
parahippocompal	Pattern 1	81.9	-20.0305	-24.783	-15.278
parahippocompal	Pattern 1	82	-20.0308	-24.7835	-15.2781
parahippocompal	Pattern 2	44	0.596951	-4.79238	5.98628
parahippocompal	Pattern 2	44.1	0.596445	-4.79262	5.98551
parahippocompal	Pattern 2	44.2	0.594926	-4.79336	5.98321
parahippocompal	Pattern 2	44.3	0.592395	-4.79458	5.97937
parahippocompal	Pattern 2	44.4	0.588852	-4.7963	5.974
parahippocompal	Pattern 2	44.5	0.584296	-4.79851	5.9671
parahippocompal	Pattern 2	44.6	0.578728	-4.8012	5.95866
parahippocompal	Pattern 2	44.7	0.572148	-4.80439	5.94868
parahippocompal	Pattern 2	44.8	0.564554	-4.80807	5.93718
parahippocompal	Pattern 2	44.9	0.555949	-4.81224	5.92413
parahippocompal	Pattern 2	45	0.546331	-4.8169	5.90956
parahippocompal	Pattern 2	45.1	0.535701	-4.82204	5.89345
parahippocompal	Pattern 2	45.2	0.524059	-4.82769	5.8758
parahippocompal	Pattern 2	45.3	0.511404	-4.83382	5.85663
parahippocompal	Pattern 2	45.4	0.497736	-4.84044	5.83591
parahippocompal	Pattern 2	45.5	0.483056	-4.84756	5.81367
parahippocompal	Pattern 2	45.6	0.467365	-4.85516	5.78989
parahippocompal	Pattern 2	45.7	0.45066	-4.86326	5.76458
parahippocompal	Pattern 2	45.8	0.432943	-4.87185	5.73774
parahippocompal	Pattern 2	45.9	0.414214	-4.88094	5.70936
parahippocompal	Pattern 2	46	0.394472	-4.89051	5.67946
parahippocompal	Pattern 2	46.1	0.373718	-4.90058	5.64802
parahippocompal	Pattern 2	46.2	0.351952	-4.91114	5.61504
parahippocompal	Pattern 2	46.3	0.329173	-4.92219	5.58054
parahippocompal	Pattern 2	46.4	0.305382	-4.93374	5.5445
parahippocompal	Pattern 2	46.5	0.280578	-4.94578	5.50694
parahippocompal	Pattern 2	46.6	0.254762	-4.95832	5.46784
parahippocompal	Pattern 2	46.7	0.227934	-4.97135	5.42722
parahippocompal	Pattern 2	46.8	0.200093	-4.98488	5.38506
parahippocompal	Pattern 2	46.9	0.171239	-4.9989	5.34138
parahippocompal	Pattern 2	47	0.141374	-5.01341	5.29616
parahippocompal	Pattern 2	47.1	0.110496	-5.02843	5.24942
parahippocompal	Pattern 2	47.2	0.0786053	-5.04394	5.20115
parahippocompal	Pattern 2	47.3	0.0457027	-5.05994	5.15135
parahippocompal	Pattern 2	47.4	0.0117874	-5.07645	5.10002
parahippocompal	Pattern 2	47.5	-0.0231402	-5.09345	5.04717
parahippocompal	Pattern 2	47.6	-0.0590797	-5.11095	4.99279
parahippocompal	Pattern 2	47.7	-0.0960328	-5.12895	4.93689
parahippocompal	Pattern 2	47.8	-0.133997	-5.14745	4.87946
parahippocompal	Pattern 2	47.9	-0.172974	-5.16645	4.8205
parahippocompal	Pattern 2	48	-0.212964	-5.18595	4.76003
parahippocompal	Pattern 2	48.1	-0.253966	-5.20596	4.69803
parahippocompal	Pattern 2	48.2	-0.29598	-5.22646	4.6345
parahippocompal	Pattern 2	48.3	-0.339007	-5.24747	4.56946
parahippocompal	Pattern 2	48.4	-0.383046	-5.26899	4.5029
parahippocompal	Pattern 2	48.5	-0.428098	-5.29101	4.43481
parahippocompal	Pattern 2	48.6	-0.474162	-5.31353	4.36521
parahippocompal	Pattern 2	48.7	-0.521238	-5.33656	4.29408
parahippocompal	Pattern 2	48.8	-0.569326	-5.3601	4.22145
parahippocompal	Pattern 2	48.9	-0.618428	-5.38415	4.14729
parahippocompal	Pattern 2	49	-0.668541	-5.4087	4.07162
parahippocompal	Pattern 2	49.1	-0.719667	-5.43377	3.99444
parahippocompal	Pattern 2	49.2	-0.771805	-5.45935	3.91574
parahippocompal	Pattern 2	49.3	-0.824956	-5.48544	3.83553
parahippocompal	Pattern 2	49.4	-0.879119	-5.51205	3.75381
parahippocompal	Pattern 2	49.5	-0.934294	-5.53917	3.67058
parahippocompal	Pattern 2	49.6	-0.990482	-5.56681	3.58584
parahippocompal	Pattern 2	49.7	-1.04768	-5.59496	3.4996
parahippocompal	Pattern 2	49.8	-1.1059	-5.62364	3.41185
parahippocompal	Pattern 2	49.9	-1.16512	-5.65284	3.3226
parahippocompal	Pattern 2	50	-1.22536	-5.68256	3.23184
parahippocompal	Pattern 2	50.1	-1.28661	-5.71281	3.13959
parahippocompal	Pattern 2	50.2	-1.34887	-5.74358	3.04584
parahippocompal	Pattern 2	50.3	-1.41214	-5.77488	2.95059
parahippocompal	Pattern 2	50.4	-1.47643	-5.80671	2.85385
parahippocompal	Pattern 2	50.5	-1.54173	-5.83907	2.75561
parahippocompal	Pattern 2	50.6	-1.60804	-5.87197	2.65589
parahippocompal	Pattern 2	50.7	-1.67537	-5.90541	2.55467
parahippocompal	Pattern 2	50.8	-1.7437	-5.93938	2.45197
parahippocompal	Pattern 2	50.9	-1.81305	-5.9739	2.34779
parahippocompal	Pattern 2	51	-1.88341	-6.00896	2.24213
parahippocompal	Pattern 2	51.1	-1.95479	-6.04457	2.13499
parahippocompal	Pattern 2	51.2	-2.02717	-6.08073	2.02638
parahippocompal	Pattern 2	51.3	-2.10057	-6.11744	1.9163
parahippocompal	Pattern 2	51.4	-2.17498	-6.15471	1.80475
parahippocompal	Pattern 2	51.5	-2.25041	-6.19254	1.69173
parahippocompal	Pattern 2	51.6	-2.32684	-6.23094	1.57726
parahippocompal	Pattern 2	51.7	-2.40429	-6.26991	1.46133
parahippocompal	Pattern 2	51.8	-2.48275	-6.30944	1.34394
parahippocompal	Pattern 2	51.9	-2.56222	-6.34956	1.22511
parahippocompal	Pattern 2	52	-2.64271	-6.39026	1.10484
parahippocompal	Pattern 2	52.1	-2.72421	-6.43154	0.983129
parahippocompal	Pattern 2	52.2	-2.80672	-6.47342	0.859986
parahippocompal	Pattern 2	52.3	-2.89024	-6.51589	0.735416
parahippocompal	Pattern 2	52.4	-2.97477	-6.55897	0.609426
parahippocompal	Pattern 2	52.5	-3.06032	-6.60266	0.482021
parahippocompal	Pattern 2	52.6	-3.14688	-6.64697	0.353209
parahippocompal	Pattern 2	52.7	-3.23445	-6.6919	0.222998
parahippocompal	Pattern 2	52.8	-3.32304	-6.73747	0.091394
parahippocompal	Pattern 2	52.9	-3.41263	-6.78368	-0.0415934
parahippocompal	Pattern 2	53	-3.50324	-6.83053	-0.175955
parahippocompal	Pattern 2	53.1	-3.59486	-6.87805	-0.311683
parahippocompal	Pattern 2	53.2	-3.6875	-6.92623	-0.448766
[truncated: 288 more rows]
