# Supplementary material for: Population clustering of structural brain aging and its association with brain development
Source: eLife. 2024 Oct 18;13:RP94970. doi: 10.7554/eLife.94970 (PMC11488854; doi:10.7554/eLife.94970)
Supplement: Figure 3—source data 1. — Distributions of biological aging biomarkers (leucocyte telomere length (LTL) and PhenoAge) among participants with brain aging patterns 1 and 2. [file elife-94970-fig3-data1.xlsx]

## Sheet: Sheet1
Fig.3 Distributions of biological aging biomarkers (leucocyte telomere length (LTL) and PhenoAge) among participants with brain aging patterns 1 and 2.
Aging Biomarkers	Brain Aging Pattern	median	first quartile	thrid quartile	P	P.Bonferroni
Leucocyte telomere length	Pattern 1	0.019	-0.63	0.652
Leucocyte telomere length	Pattern 2	-0.021	-0.65	0.619	0.006	0.011
PhenoAge	Pattern 1	-0.046	-0.327	0.255
PhenoAge	Pattern 2	-0.001	-0.286	0.303	3.05e-15	6.11e-15
