# Supplementary material for: Population clustering of structural brain aging and its association with brain development
Source: eLife. 2024 Oct 18;13:RP94970. doi: 10.7554/eLife.94970 (PMC11488854; doi:10.7554/eLife.94970)
Supplement: Figure 4—source data 1. — Effect size (Cohen’s D or odds ratio) for comparing the cognitive functions between participants with brain aging patterns 1 and 2. [file elife-94970-fig4-data1.xlsx]

## Sheet: Sheet1
Fig.4 Effect size (Cohen’s D or odds ratio) for comparing the cognitive functions between participants with brain aging patterns 1 and 2.
Cognitive functions	Cohen’s d (95% CI)	P	P.FDR
Reaction time	0.006 (-0.016, 0.028)	0.61	0.61
Numeric memory	-0.080 (-0.106, -0.055)	8.99e-10	4.95e-09
Fluid intelligence	-0.99 (-0.121, -0.077)	3.3e-18	3.63e-17
Trail making A	-0.050 (-0.074, -0.024)	0.000146	0.000229
Trail making B	-0.067 (-0.093, -0.041)	6.16e-07	1.69e-06
Matrix pattern completion	-0.078 (-0.104, -0.052)	3.67e-09	1.35e-08
Symbol digit substitution	-0.053 (-0.079, -0.027)	6.15e-05	0.000113
Tower rearranging	-0.049 (-0.075, -0.023)	0.000218	0.0003
Paired associate learning	-0.054 (-0.079, -0.028)	4.89e-05	0.000108
Prospective memory	OR: 0.940 (0.883, 1.000)	0.052	0.057
Pairs matching	-0.033 (-0.055, -0.011)	0.003	0.004
