# Supplementary material for: Population clustering of structural brain aging and its association with brain development
Source: eLife. 2024 Oct 18;13:RP94970. doi: 10.7554/eLife.94970 (PMC11488854; doi:10.7554/eLife.94970)
Supplement: Figure 5—source data 1. — Participants with accelerated brain aging (brain aging pattern 2) had significantly increased genetic liability to ADHD and delayed brain development. [file elife-94970-fig5-data1.xlsx]

## Sheet: Sheet1
Fig.5 Participants with accelerated brain aging (brain aging pattern 2) had significantly increased genetic liability to ADHD and delayed brain development.
Traits	Pvalue threshold	P	P.FDR
ADHD	Pt_0.005	0.0689958	0.275983
ADHD	Pt_0.01	0.0681728	0.272691
ADHD	Pt_0.015	0.110734	0.221468
ADHD	Pt_0.02	0.0151685	0.0606739
ADHD	Pt_0.025	0.00719517	0.0287807
ADHD	Pt_0.03	0.0197753	0.0791014
ADHD	Pt_0.035	0.0115356	0.0461424
ADHD	Pt_0.04	0.013236	0.052944
ADHD	Pt_0.045	0.00939066	0.0375627
ADHD	Pt_0.05	0.0166119	0.0664474
ADHD	Pt_0.055	0.0275704	0.110282
ADHD	Pt_0.06	0.013296	0.0531841
ADHD	Pt_0.065	0.0164665	0.0658661
ADHD	Pt_0.07	0.0122626	0.0490506
ADHD	Pt_0.075	0.0225392	0.0901567
ADHD	Pt_0.08	0.0349481	0.139792
ADHD	Pt_0.085	0.0302917	0.121167
ADHD	Pt_0.09	0.0250697	0.100279
ADHD	Pt_0.095	0.0195219	0.0780878
ADHD	Pt_0.1	0.0119806	0.0479224
ADHD	Pt_0.105	0.0142236	0.0568944
ADHD	Pt_0.11	0.0180545	0.072218
ADHD	Pt_0.115	0.0175596	0.0702385
ADHD	Pt_0.12	0.0161315	0.0645259
ADHD	Pt_0.125	0.0148659	0.0594636
ADHD	Pt_0.13	0.00883452	0.0353381
ADHD	Pt_0.135	0.0077842	0.0311368
ADHD	Pt_0.14	0.00708472	0.0283389
ADHD	Pt_0.145	0.00924281	0.0369712
ADHD	Pt_0.15	0.00798907	0.0319563
ADHD	Pt_0.155	0.00636721	0.0254688
ADHD	Pt_0.16	0.00586729	0.0234692
ADHD	Pt_0.165	0.00503854	0.0201542
ADHD	Pt_0.17	0.0045578	0.0182312
ADHD	Pt_0.175	0.00605797	0.0242319
ADHD	Pt_0.18	0.00384253	0.0153701
ADHD	Pt_0.185	0.0044741	0.0178964
ADHD	Pt_0.19	0.00562522	0.0225009
ADHD	Pt_0.195	0.00818698	0.0327479
ADHD	Pt_0.2	0.00767389	0.0306956
ADHD	Pt_0.205	0.00885921	0.0354369
ADHD	Pt_0.21	0.00757394	0.0302957
ADHD	Pt_0.215	0.00689986	0.0275994
ADHD	Pt_0.22	0.00593092	0.0237237
ADHD	Pt_0.225	0.00808552	0.0323421
ADHD	Pt_0.23	0.00998663	0.0399465
ADHD	Pt_0.235	0.0160806	0.0643224
ADHD	Pt_0.24	0.0154067	0.0616269
ADHD	Pt_0.245	0.012892	0.0515681
ADHD	Pt_0.25	0.0132404	0.0529615
ADHD	Pt_0.255	0.00901508	0.0360603
ADHD	Pt_0.26	0.00914236	0.0365695
ADHD	Pt_0.265	0.00733473	0.0293389
ADHD	Pt_0.27	0.00757509	0.0303004
ADHD	Pt_0.275	0.00651405	0.0260562
ADHD	Pt_0.28	0.00525325	0.021013
ADHD	Pt_0.285	0.00697439	0.0278976
ADHD	Pt_0.29	0.00790747	0.0316299
ADHD	Pt_0.295	0.00640311	0.0256125
ADHD	Pt_0.3	0.00588703	0.0235481
ADHD	Pt_0.305	0.00503559	0.0201424
ADHD	Pt_0.31	0.00591367	0.0236547
ADHD	Pt_0.315	0.00538026	0.021521
ADHD	Pt_0.32	0.00618735	0.0247494
ADHD	Pt_0.325	0.00695251	0.02781
ADHD	Pt_0.33	0.00586093	0.0234437
ADHD	Pt_0.335	0.00621984	0.0248794
ADHD	Pt_0.34	0.00745148	0.0298059
ADHD	Pt_0.345	0.0075393	0.0301572
ADHD	Pt_0.35	0.00715696	0.0286278
ADHD	Pt_0.355	0.00948425	0.037937
ADHD	Pt_0.36	0.0106328	0.0425311
ADHD	Pt_0.365	0.011315	0.0452598
ADHD	Pt_0.37	0.0132289	0.0529155
ADHD	Pt_0.375	0.0142256	0.0569023
ADHD	Pt_0.38	0.0127603	0.0510414
ADHD	Pt_0.385	0.0134415	0.053766
ADHD	Pt_0.39	0.0135137	0.0540548
ADHD	Pt_0.395	0.0165887	0.066355
ADHD	Pt_0.4	0.0202993	0.0811971
ADHD	Pt_0.405	0.0225666	0.0902665
ADHD	Pt_0.41	0.0212926	0.0851704
ADHD	Pt_0.415	0.0231216	0.0924863
ADHD	Pt_0.42	0.0215063	0.0860251
ADHD	Pt_0.425	0.0231071	0.0924284
ADHD	Pt_0.43	0.0249751	0.0999004
ADHD	Pt_0.435	0.0258906	0.103562
ADHD	Pt_0.44	0.0266061	0.106424
ADHD	Pt_0.445	0.0319944	0.127978
ADHD	Pt_0.45	0.033766	0.135064
ADHD	Pt_0.455	0.0366086	0.146435
ADHD	Pt_0.46	0.0331621	0.132648
ADHD	Pt_0.465	0.0355973	0.142389
ADHD	Pt_0.47	0.0371891	0.148757
ADHD	Pt_0.475	0.0337063	0.134825
ADHD	Pt_0.48	0.0332572	0.133029
ADHD	Pt_0.485	0.0329444	0.131778
ADHD	Pt_0.49	0.0309721	0.123889
ADHD	Pt_0.495	0.033232	0.132928
ADHD	Pt_0.5	0.0338996	0.135598
ADHD	Pt_1	0.0566036	0.226414
ADHD	mean_z	0.00993945	0.0397578
ASD	Pt_0.005	0.95427	0.95427
ASD	Pt_0.01	0.792061	0.792061
ASD	Pt_0.015	0.459497	0.612663
ASD	Pt_0.02	0.76235	0.76235
ASD	Pt_0.025	0.685651	0.685651
ASD	Pt_0.03	0.762834	0.762834
ASD	Pt_0.035	0.987676	0.987676
ASD	Pt_0.04	0.799763	0.84723
ASD	Pt_0.045	0.953089	0.981763
ASD	Pt_0.05	0.85002	0.863012
ASD	Pt_0.055	0.955004	0.955004
ASD	Pt_0.06	0.806053	0.89724
ASD	Pt_0.065	0.763337	0.910351
ASD	Pt_0.07	0.790227	0.935488
ASD	Pt_0.075	0.682017	0.837328
ASD	Pt_0.08	0.592984	0.855848
ASD	Pt_0.085	0.624742	0.776073
ASD	Pt_0.09	0.737804	0.74428
ASD	Pt_0.095	0.774152	0.774152
ASD	Pt_0.1	0.661374	0.661374
ASD	Pt_0.105	0.629626	0.65938
ASD	Pt_0.11	0.711516	0.711516
ASD	Pt_0.115	0.597769	0.597769
ASD	Pt_0.12	0.495552	0.555712
ASD	Pt_0.125	0.503596	0.508222
ASD	Pt_0.13	0.468039	0.525653
ASD	Pt_0.135	0.443869	0.581214
ASD	Pt_0.14	0.43681	0.598964
ASD	Pt_0.145	0.384403	0.601925
ASD	Pt_0.15	0.426529	0.682447
ASD	Pt_0.155	0.338254	0.666616
ASD	Pt_0.16	0.322111	0.644223
ASD	Pt_0.165	0.356234	0.712469
ASD	Pt_0.17	0.350503	0.701006
ASD	Pt_0.175	0.35856	0.717121
ASD	Pt_0.18	0.350769	0.67051
ASD	Pt_0.185	0.393255	0.636181
ASD	Pt_0.19	0.445049	0.697207
ASD	Pt_0.195	0.435649	0.674163
ASD	Pt_0.2	0.399904	0.597792
ASD	Pt_0.205	0.362126	0.579401
ASD	Pt_0.21	0.291448	0.507614
ASD	Pt_0.215	0.292001	0.467201
ASD	Pt_0.22	0.329467	0.529371
ASD	Pt_0.225	0.391714	0.525662
ASD	Pt_0.23	0.434961	0.579948
ASD	Pt_0.235	0.479923	0.639898
ASD	Pt_0.24	0.470353	0.627137
ASD	Pt_0.245	0.45146	0.601946
ASD	Pt_0.25	0.407112	0.542815
ASD	Pt_0.255	0.399076	0.558379
ASD	Pt_0.26	0.394905	0.568604
ASD	Pt_0.265	0.429363	0.572484
ASD	Pt_0.27	0.44073	0.58764
ASD	Pt_0.275	0.421296	0.561728
ASD	Pt_0.28	0.408758	0.554175
ASD	Pt_0.285	0.338491	0.532369
ASD	Pt_0.29	0.324269	0.518831
ASD	Pt_0.295	0.324033	0.518454
ASD	Pt_0.3	0.331003	0.529604
ASD	Pt_0.305	0.350922	0.547351
ASD	Pt_0.31	0.335105	0.536168
ASD	Pt_0.315	0.39198	0.52264
ASD	Pt_0.32	0.325137	0.514464
ASD	Pt_0.325	0.300635	0.481016
ASD	Pt_0.33	0.275168	0.440268
ASD	Pt_0.335	0.286222	0.457956
ASD	Pt_0.34	0.26876	0.430015
ASD	Pt_0.345	0.275861	0.441377
ASD	Pt_0.35	0.282723	0.452357
ASD	Pt_0.355	0.293382	0.469411
ASD	Pt_0.36	0.279119	0.446591
ASD	Pt_0.365	0.266398	0.426236
ASD	Pt_0.37	0.255416	0.408665
ASD	Pt_0.375	0.259583	0.415333
ASD	Pt_0.38	0.264272	0.422834
ASD	Pt_0.385	0.265024	0.424039
ASD	Pt_0.39	0.286663	0.458662
ASD	Pt_0.395	0.290671	0.465074
ASD	Pt_0.4	0.328806	0.526089
ASD	Pt_0.405	0.328195	0.525112
ASD	Pt_0.41	0.34347	0.515525
ASD	Pt_0.415	0.35542	0.519124
ASD	Pt_0.42	0.353047	0.503852
ASD	Pt_0.425	0.341756	0.461555
ASD	Pt_0.43	0.356861	0.475814
ASD	Pt_0.435	0.32986	0.439813
ASD	Pt_0.44	0.315661	0.437648
ASD	Pt_0.445	0.323728	0.444882
ASD	Pt_0.45	0.346876	0.462501
ASD	Pt_0.455	0.336558	0.45634
ASD	Pt_0.46	0.357906	0.477208
ASD	Pt_0.465	0.33189	0.449272
ASD	Pt_0.47	0.350351	0.467134
ASD	Pt_0.475	0.378782	0.505042
ASD	Pt_0.48	0.401176	0.534901
ASD	Pt_0.485	0.381763	0.509017
ASD	Pt_0.49	0.369363	0.494835
ASD	Pt_0.495	0.34749	0.499458
ASD	Pt_0.5	0.360443	0.497283
ASD	Pt_1	0.350588	0.467451
ASD	mean_z	0.384675	0.61548
AD	Pt_0.005	0.639024	0.873948
AD	Pt_0.01	0.514783	0.686377
AD	Pt_0.015	0.600894	0.686736
AD	Pt_0.02	0.659755	0.76235
AD	Pt_0.025	0.432307	0.603393
AD	Pt_0.03	0.272022	0.435236
AD	Pt_0.035	0.275293	0.440469
AD	Pt_0.04	0.316778	0.506844
AD	Pt_0.045	0.383645	0.613832
AD	Pt_0.05	0.360161	0.576258
AD	Pt_0.055	0.351829	0.562927
AD	Pt_0.06	0.394547	0.631276
AD	Pt_0.065	0.434839	0.695743
AD	Pt_0.07	0.569943	0.911909
AD	Pt_0.075	0.67995	0.837328
AD	Pt_0.08	0.641886	0.855848
AD	Pt_0.085	0.591372	0.776073
AD	Pt_0.09	0.536794	0.74428
AD	Pt_0.095	0.590868	0.774152
AD	Pt_0.1	0.563383	0.661374
AD	Pt_0.105	0.566382	0.65938
AD	Pt_0.11	0.543887	0.711516
AD	Pt_0.115	0.522459	0.597769
AD	Pt_0.12	0.414466	0.555712
AD	Pt_0.125	0.466965	0.508222
AD	Pt_0.13	0.475861	0.525653
AD	Pt_0.135	0.402717	0.581214
AD	Pt_0.14	0.333377	0.598964
AD	Pt_0.145	0.317777	0.601925
AD	Pt_0.15	0.348723	0.682447
AD	Pt_0.155	0.416635	0.666616
AD	Pt_0.16	0.477385	0.672451
AD	Pt_0.165	0.467306	0.74769
AD	Pt_0.17	0.477494	0.715533
AD	Pt_0.175	0.483542	0.773667
AD	Pt_0.18	0.419069	0.67051
AD	Pt_0.185	0.397613	0.636181
AD	Pt_0.19	0.368115	0.697207
AD	Pt_0.195	0.310871	0.621741
AD	Pt_0.2	0.342195	0.597792
AD	Pt_0.205	0.330626	0.579401
AD	Pt_0.21	0.317258	0.507614
AD	Pt_0.215	0.27872	0.467201
AD	Pt_0.22	0.330857	0.529371
AD	Pt_0.225	0.338487	0.525662
AD	Pt_0.23	0.293962	0.579948
AD	Pt_0.235	0.261324	0.522648
AD	Pt_0.24	0.208741	0.417483
AD	Pt_0.245	0.207912	0.415824
AD	Pt_0.25	0.200831	0.401661
AD	Pt_0.255	0.208272	0.416545
AD	Pt_0.26	0.196648	0.393296
AD	Pt_0.265	0.194137	0.388274
AD	Pt_0.27	0.194647	0.389294
AD	Pt_0.275	0.186152	0.372304
AD	Pt_0.28	0.207121	0.414242
AD	Pt_0.285	0.246441	0.492883
AD	Pt_0.29	0.24957	0.499139
AD	Pt_0.295	0.224466	0.448932
AD	Pt_0.3	0.233504	0.467008
AD	Pt_0.305	0.225631	0.451261
AD	Pt_0.31	0.215495	0.43099
AD	Pt_0.315	0.232172	0.464344
AD	Pt_0.32	0.249301	0.498602
AD	Pt_0.325	0.245313	0.481016
AD	Pt_0.33	0.263359	0.440268
AD	Pt_0.335	0.267009	0.457956
AD	Pt_0.34	0.26025	0.430015
AD	Pt_0.345	0.249869	0.441377
AD	Pt_0.35	0.245188	0.452357
AD	Pt_0.355	0.228381	0.456762
AD	Pt_0.36	0.233491	0.446591
AD	Pt_0.365	0.227641	0.426236
AD	Pt_0.37	0.238074	0.408665
AD	Pt_0.375	0.217759	0.415333
AD	Pt_0.38	0.232147	0.422834
AD	Pt_0.385	0.215868	0.424039
AD	Pt_0.39	0.240033	0.458662
AD	Pt_0.395	0.249986	0.465074
AD	Pt_0.4	0.220613	0.441227
AD	Pt_0.405	0.210776	0.421551
AD	Pt_0.41	0.220634	0.441268
AD	Pt_0.415	0.208191	0.416382
AD	Pt_0.42	0.199529	0.399058
AD	Pt_0.425	0.215864	0.431727
AD	Pt_0.43	0.234058	0.468115
AD	Pt_0.435	0.23247	0.439813
AD	Pt_0.44	0.229679	0.437648
AD	Pt_0.445	0.224984	0.444882
AD	Pt_0.45	0.213103	0.426205
AD	Pt_0.455	0.206855	0.41371
AD	Pt_0.46	0.218794	0.437588
AD	Pt_0.465	0.217011	0.434022
AD	Pt_0.47	0.20482	0.40964
AD	Pt_0.475	0.212287	0.424574
AD	Pt_0.48	0.214152	0.428304
AD	Pt_0.485	0.229691	0.459383
AD	Pt_0.49	0.229548	0.459097
AD	Pt_0.495	0.227454	0.454907
AD	Pt_0.5	0.220404	0.440807
AD	Pt_1	0.269499	0.467451
AD	mean_z	0.27086	0.54172
PD	Pt_0.005	0.619867	0.873948
PD	Pt_0.01	0.107651	0.28707
PD	Pt_0.015	0.070441	0.210174
PD	Pt_0.02	0.097165	0.19433
PD	Pt_0.025	0.115885	0.255236
PD	Pt_0.03	0.127724	0.338724
PD	Pt_0.035	0.165434	0.330869
PD	Pt_0.04	0.185798	0.371596
PD	Pt_0.045	0.237963	0.475926
PD	Pt_0.05	0.205488	0.410975
PD	Pt_0.055	0.238496	0.476992
PD	Pt_0.06	0.237012	0.474024
PD	Pt_0.065	0.293775	0.58755
PD	Pt_0.07	0.280798	0.561595
PD	Pt_0.075	0.3798	0.759601
PD	Pt_0.08	0.39198	0.783959
PD	Pt_0.085	0.545361	0.776073
PD	Pt_0.09	0.462748	0.74428
PD	Pt_0.095	0.643786	0.774152
PD	Pt_0.1	0.567989	0.661374
PD	Pt_0.105	0.526846	0.65938
PD	Pt_0.11	0.445171	0.711516
PD	Pt_0.115	0.412756	0.597769
PD	Pt_0.12	0.460992	0.555712
PD	Pt_0.125	0.447208	0.508222
PD	Pt_0.13	0.523139	0.525653
PD	Pt_0.135	0.624268	0.624268
PD	Pt_0.14	0.614458	0.614458
PD	Pt_0.145	0.554749	0.601925
PD	Pt_0.15	0.534417	0.712556
PD	Pt_0.155	0.60483	0.725078
PD	Pt_0.16	0.504338	0.672451
PD	Pt_0.165	0.623184	0.761272
PD	Pt_0.17	0.573591	0.715533
PD	Pt_0.175	0.678502	0.775431
PD	Pt_0.18	0.706793	0.807763
PD	Pt_0.185	0.64709	0.764092
PD	Pt_0.19	0.607942	0.697207
PD	Pt_0.195	0.603057	0.674163
PD	Pt_0.2	0.59492	0.597792
PD	Pt_0.205	0.593497	0.659332
PD	Pt_0.21	0.648658	0.67963
PD	Pt_0.215	0.699815	0.699815
PD	Pt_0.22	0.78646	0.78646
PD	Pt_0.225	0.766644	0.766644
PD	Pt_0.23	0.768743	0.768743
PD	Pt_0.235	0.817356	0.817356
PD	Pt_0.24	0.901397	0.901397
PD	Pt_0.245	0.927052	0.927052
PD	Pt_0.25	0.888298	0.888298
PD	Pt_0.255	0.857025	0.857025
PD	Pt_0.26	0.817349	0.817349
PD	Pt_0.265	0.833609	0.833609
PD	Pt_0.27	0.911413	0.911413
PD	Pt_0.275	0.831661	0.831661
PD	Pt_0.28	0.813513	0.813513
PD	Pt_0.285	0.826335	0.826335
PD	Pt_0.29	0.794356	0.794356
PD	Pt_0.295	0.798296	0.798296
PD	Pt_0.3	0.763454	0.763454
PD	Pt_0.305	0.789508	0.789508
PD	Pt_0.31	0.857992	0.857992
PD	Pt_0.315	0.875526	0.875526
PD	Pt_0.32	0.890171	0.890171
PD	Pt_0.325	0.963991	0.963991
PD	Pt_0.33	0.995302	0.995302
PD	Pt_0.335	0.997893	0.997893
PD	Pt_0.34	0.984333	0.984333
PD	Pt_0.345	0.927584	0.927716
PD	Pt_0.35	0.890874	0.890874
PD	Pt_0.355	0.851732	0.873724
PD	Pt_0.36	0.887008	0.898421
PD	Pt_0.365	0.880247	0.883281
PD	Pt_0.37	0.919554	0.960743
PD	Pt_0.375	0.857157	0.914759
PD	Pt_0.38	0.890855	0.984261
PD	Pt_0.385	0.890152	0.970887
PD	Pt_0.39	0.877695	0.964192
PD	Pt_0.395	0.853659	0.973626
PD	Pt_0.4	0.803155	0.917891
PD	Pt_0.405	0.790518	0.903449
PD	Pt_0.41	0.807547	0.92291
PD	Pt_0.415	0.828449	0.91161
PD	Pt_0.42	0.780591	0.859569
PD	Pt_0.425	0.788975	0.857758
PD	Pt_0.43	0.783096	0.870071
PD	Pt_0.435	0.799602	0.859818
PD	Pt_0.44	0.81315	0.896604
PD	Pt_0.445	0.853246	0.910869
PD	Pt_0.45	0.858209	0.871586
PD	Pt_0.455	0.971034	0.971034
PD	Pt_0.46	0.977391	0.977391
PD	Pt_0.465	0.970577	0.970577
PD	Pt_0.47	0.969926	0.969926
PD	Pt_0.475	0.9741	0.9741
PD	Pt_0.48	0.995827	0.995827
PD	Pt_0.485	0.980541	0.980541
PD	Pt_0.49	0.926045	0.926045
PD	Pt_0.495	0.97982	0.97982
PD	Pt_0.5	0.956332	0.956332
PD	Pt_1	0.881606	0.881606
PD	mean_z	0.789435	0.789435
BIP	Pt_0.005	0.764705	0.873948
BIP	Pt_0.01	0.427938	0.686377
BIP	Pt_0.015	0.0788152	0.210174
BIP	Pt_0.02	0.0765522	0.19433
BIP	Pt_0.025	0.127618	0.255236
BIP	Pt_0.03	0.169362	0.338724
BIP	Pt_0.035	0.128055	0.330869
BIP	Pt_0.04	0.120646	0.321723
BIP	Pt_0.045	0.108949	0.29053
BIP	Pt_0.05	0.133321	0.355523
BIP	Pt_0.055	0.153231	0.408616
BIP	Pt_0.06	0.194697	0.474024
BIP	Pt_0.065	0.0939912	0.250643
BIP	Pt_0.07	0.0799832	0.213288
BIP	Pt_0.075	0.0881624	0.2351
BIP	Pt_0.08	0.0845078	0.225354
BIP	Pt_0.085	0.0750863	0.20023
BIP	Pt_0.09	0.0843224	0.22486
BIP	Pt_0.095	0.0555855	0.148228
BIP	Pt_0.1	0.0655519	0.174805
BIP	Pt_0.105	0.0693814	0.185017
BIP	Pt_0.11	0.0876136	0.233636
BIP	Pt_0.115	0.110718	0.295248
BIP	Pt_0.12	0.0914601	0.243893
BIP	Pt_0.125	0.118509	0.316024
BIP	Pt_0.13	0.110138	0.293701
BIP	Pt_0.135	0.104995	0.279987
BIP	Pt_0.14	0.0882039	0.23521
BIP	Pt_0.145	0.0956601	0.255094
BIP	Pt_0.15	0.126452	0.337206
BIP	Pt_0.155	0.112998	0.301328
BIP	Pt_0.16	0.0873681	0.232982
BIP	Pt_0.165	0.0832293	0.221945
BIP	Pt_0.17	0.0784961	0.209323
BIP	Pt_0.175	0.0832904	0.222108
BIP	Pt_0.18	0.0702433	0.187316
BIP	Pt_0.185	0.0775905	0.206908
BIP	Pt_0.19	0.081318	0.216848
BIP	Pt_0.195	0.0822267	0.219271
BIP	Pt_0.2	0.0866809	0.231149
BIP	Pt_0.205	0.0851642	0.227105
BIP	Pt_0.21	0.086117	0.229645
BIP	Pt_0.215	0.0932917	0.248778
BIP	Pt_0.22	0.0994685	0.265249
BIP	Pt_0.225	0.10263	0.27368
BIP	Pt_0.23	0.103234	0.275292
BIP	Pt_0.235	0.104239	0.277972
BIP	Pt_0.24	0.10916	0.291093
BIP	Pt_0.245	0.0948664	0.252977
BIP	Pt_0.25	0.0986279	0.263008
BIP	Pt_0.255	0.11072	0.295253
BIP	Pt_0.26	0.109153	0.291075
BIP	Pt_0.265	0.112352	0.299605
BIP	Pt_0.27	0.112014	0.298704
BIP	Pt_0.275	0.113589	0.302904
BIP	Pt_0.28	0.10571	0.281893
BIP	Pt_0.285	0.111978	0.298608
BIP	Pt_0.29	0.13214	0.352373
BIP	Pt_0.295	0.115194	0.307185
BIP	Pt_0.3	0.106826	0.28487
BIP	Pt_0.305	0.0993307	0.264882
BIP	Pt_0.31	0.0846809	0.225816
BIP	Pt_0.315	0.0890047	0.237346
BIP	Pt_0.32	0.0849501	0.226534
BIP	Pt_0.325	0.0844367	0.225165
BIP	Pt_0.33	0.0769625	0.205233
BIP	Pt_0.335	0.076332	0.203552
BIP	Pt_0.34	0.0750225	0.20006
BIP	Pt_0.345	0.0800022	0.213339
BIP	Pt_0.35	0.0810529	0.216141
BIP	Pt_0.355	0.0797939	0.212784
BIP	Pt_0.36	0.0924477	0.246527
BIP	Pt_0.365	0.101438	0.270502
BIP	Pt_0.37	0.0927725	0.247393
BIP	Pt_0.375	0.0964015	0.257071
BIP	Pt_0.38	0.0847132	0.225902
BIP	Pt_0.385	0.0822785	0.219409
BIP	Pt_0.39	0.0831595	0.221759
BIP	Pt_0.395	0.0784685	0.209249
BIP	Pt_0.4	0.0732643	0.195371
BIP	Pt_0.405	0.073272	0.195392
BIP	Pt_0.41	0.0737719	0.196725
BIP	Pt_0.415	0.0731098	0.19496
BIP	Pt_0.42	0.0748159	0.199509
BIP	Pt_0.425	0.0760187	0.202716
BIP	Pt_0.43	0.0733542	0.195611
BIP	Pt_0.435	0.0683124	0.182166
BIP	Pt_0.44	0.0632465	0.168657
BIP	Pt_0.445	0.0620432	0.165449
BIP	Pt_0.45	0.0602063	0.16055
BIP	Pt_0.455	0.0591379	0.157701
BIP	Pt_0.46	0.0614016	0.163738
BIP	Pt_0.465	0.0695718	0.185525
BIP	Pt_0.47	0.0730744	0.194865
BIP	Pt_0.475	0.0648407	0.172909
BIP	Pt_0.48	0.0666643	0.177771
BIP	Pt_0.485	0.0679644	0.181238
BIP	Pt_0.49	0.0693978	0.185061
BIP	Pt_0.495	0.0703842	0.187691
BIP	Pt_0.5	0.0690946	0.184252
BIP	Pt_1	0.0864252	0.230467
BIP	mean_z	0.0801486	0.21373
MDD	Pt_0.005	0.671105	0.873948
MDD	Pt_0.01	0.627204	0.716804
MDD	Pt_0.015	0.930757	0.930757
MDD	Pt_0.02	0.683294	0.76235
MDD	Pt_0.025	0.61622	0.685651
MDD	Pt_0.03	0.719735	0.762834
MDD	Pt_0.035	0.80142	0.951421
MDD	Pt_0.04	0.84723	0.84723
MDD	Pt_0.045	0.981763	0.981763
MDD	Pt_0.05	0.693124	0.863012
MDD	Pt_0.055	0.809271	0.955004
MDD	Pt_0.06	0.715058	0.89724
MDD	Pt_0.065	0.796557	0.910351
MDD	Pt_0.07	0.818552	0.935488
MDD	Pt_0.075	0.732662	0.837328
MDD	Pt_0.08	0.82613	0.866104
MDD	Pt_0.085	0.679064	0.776073
MDD	Pt_0.09	0.624059	0.74428
MDD	Pt_0.095	0.591989	0.774152
MDD	Pt_0.1	0.422613	0.661374
MDD	Pt_0.105	0.480328	0.65938
MDD	Pt_0.11	0.433572	0.711516
MDD	Pt_0.115	0.517975	0.597769
MDD	Pt_0.12	0.495435	0.555712
MDD	Pt_0.125	0.508222	0.508222
MDD	Pt_0.13	0.467105	0.525653
MDD	Pt_0.135	0.460869	0.581214
MDD	Pt_0.14	0.524093	0.598964
MDD	Pt_0.145	0.601925	0.601925
MDD	Pt_0.15	0.745836	0.745836
MDD	Pt_0.155	0.730284	0.730284
MDD	Pt_0.16	0.732133	0.732133
MDD	Pt_0.165	0.770315	0.770315
MDD	Pt_0.17	0.842997	0.842997
MDD	Pt_0.175	0.879948	0.879948
MDD	Pt_0.18	0.85785	0.85785
MDD	Pt_0.185	0.912645	0.912645
MDD	Pt_0.19	0.800741	0.800741
MDD	Pt_0.195	0.674163	0.674163
MDD	Pt_0.2	0.597792	0.597792
MDD	Pt_0.205	0.659332	0.659332
MDD	Pt_0.21	0.67963	0.67963
MDD	Pt_0.215	0.572524	0.654313
MDD	Pt_0.22	0.553583	0.632666
MDD	Pt_0.225	0.599851	0.685545
MDD	Pt_0.23	0.717121	0.768743
MDD	Pt_0.235	0.76776	0.817356
MDD	Pt_0.24	0.721395	0.824451
MDD	Pt_0.245	0.644906	0.737035
MDD	Pt_0.25	0.62064	0.709302
MDD	Pt_0.255	0.62795	0.717658
MDD	Pt_0.26	0.644175	0.736199
MDD	Pt_0.265	0.677366	0.774133
MDD	Pt_0.27	0.767957	0.877665
MDD	Pt_0.275	0.74771	0.831661
MDD	Pt_0.28	0.787774	0.813513
MDD	Pt_0.285	0.720836	0.823812
MDD	Pt_0.29	0.75119	0.794356
MDD	Pt_0.295	0.71693	0.798296
MDD	Pt_0.3	0.704654	0.763454
MDD	Pt_0.305	0.694539	0.789508
MDD	Pt_0.31	0.708535	0.809754
MDD	Pt_0.315	0.718697	0.821367
MDD	Pt_0.32	0.738882	0.844436
MDD	Pt_0.325	0.740956	0.846806
MDD	Pt_0.33	0.750109	0.857267
MDD	Pt_0.335	0.783886	0.895869
MDD	Pt_0.34	0.853423	0.975341
MDD	Pt_0.345	0.927716	0.927716
MDD	Pt_0.35	0.855826	0.890874
MDD	Pt_0.355	0.873724	0.873724
MDD	Pt_0.36	0.898421	0.898421
MDD	Pt_0.365	0.883281	0.883281
MDD	Pt_0.37	0.960743	0.960743
MDD	Pt_0.375	0.914759	0.914759
MDD	Pt_0.38	0.984261	0.984261
MDD	Pt_0.385	0.970887	0.970887
MDD	Pt_0.39	0.964192	0.964192
MDD	Pt_0.395	0.973626	0.973626
MDD	Pt_0.4	0.922888	0.922888
MDD	Pt_0.405	0.934869	0.934869
MDD	Pt_0.41	0.928397	0.928397
MDD	Pt_0.415	0.91161	0.91161
MDD	Pt_0.42	0.859569	0.859569
MDD	Pt_0.425	0.857758	0.857758
MDD	Pt_0.43	0.870071	0.870071
MDD	Pt_0.435	0.859818	0.859818
MDD	Pt_0.44	0.896604	0.896604
MDD	Pt_0.445	0.910869	0.910869
MDD	Pt_0.45	0.871586	0.871586
MDD	Pt_0.455	0.870146	0.971034
MDD	Pt_0.46	0.904021	0.977391
MDD	Pt_0.465	0.892557	0.970577
MDD	Pt_0.47	0.928901	0.969926
MDD	Pt_0.475	0.896373	0.9741
MDD	Pt_0.48	0.829881	0.948435
MDD	Pt_0.485	0.838549	0.958342
MDD	Pt_0.49	0.835554	0.926045
MDD	Pt_0.495	0.844377	0.965002
MDD	Pt_0.5	0.800675	0.915057
MDD	Pt_1	0.860814	0.881606
MDD	mean_z	0.761253	0.789435
SCZ	Pt_0.005	0.659856	0.873948
SCZ	Pt_0.01	0.51093	0.686377
SCZ	Pt_0.015	0.324081	0.518529
SCZ	Pt_0.02	0.353906	0.56625
SCZ	Pt_0.025	0.452544	0.603393
SCZ	Pt_0.03	0.62074	0.762834
SCZ	Pt_0.035	0.832494	0.951421
SCZ	Pt_0.04	0.799994	0.84723
SCZ	Pt_0.045	0.759828	0.981763
SCZ	Pt_0.05	0.863012	0.863012
SCZ	Pt_0.055	0.930851	0.955004
SCZ	Pt_0.06	0.89724	0.89724
SCZ	Pt_0.065	0.928582	0.928582
SCZ	Pt_0.07	0.980918	0.980918
SCZ	Pt_0.075	0.901097	0.901097
SCZ	Pt_0.08	0.866104	0.866104
SCZ	Pt_0.085	0.787915	0.787915
SCZ	Pt_0.09	0.74428	0.74428
SCZ	Pt_0.095	0.714028	0.774152
SCZ	Pt_0.1	0.651237	0.661374
SCZ	Pt_0.105	0.65938	0.65938
SCZ	Pt_0.11	0.638468	0.711516
SCZ	Pt_0.115	0.582582	0.597769
SCZ	Pt_0.12	0.555712	0.555712
SCZ	Pt_0.125	0.498486	0.508222
SCZ	Pt_0.13	0.525653	0.525653
SCZ	Pt_0.135	0.508563	0.581214
SCZ	Pt_0.14	0.467469	0.598964
SCZ	Pt_0.145	0.527654	0.601925
SCZ	Pt_0.15	0.627326	0.716944
SCZ	Pt_0.155	0.634443	0.725078
SCZ	Pt_0.16	0.651589	0.732133
SCZ	Pt_0.165	0.666113	0.761272
SCZ	Pt_0.17	0.626091	0.715533
SCZ	Pt_0.175	0.624792	0.775431
SCZ	Pt_0.18	0.679528	0.807763
SCZ	Pt_0.185	0.66858	0.764092
SCZ	Pt_0.19	0.610056	0.697207
SCZ	Pt_0.195	0.557958	0.674163
SCZ	Pt_0.2	0.49644	0.597792
SCZ	Pt_0.205	0.453109	0.604145
SCZ	Pt_0.21	0.46194	0.61592
SCZ	Pt_0.215	0.415665	0.55422
SCZ	Pt_0.22	0.433111	0.577482
SCZ	Pt_0.225	0.394247	0.525662
SCZ	Pt_0.23	0.392758	0.579948
SCZ	Pt_0.235	0.412065	0.639898
SCZ	Pt_0.24	0.405422	0.627137
SCZ	Pt_0.245	0.416291	0.601946
SCZ	Pt_0.25	0.404331	0.542815
SCZ	Pt_0.255	0.418784	0.558379
SCZ	Pt_0.26	0.426453	0.568604
SCZ	Pt_0.265	0.409174	0.572484
SCZ	Pt_0.27	0.413538	0.58764
SCZ	Pt_0.275	0.402732	0.561728
SCZ	Pt_0.28	0.415631	0.554175
SCZ	Pt_0.285	0.399277	0.532369
SCZ	Pt_0.29	0.391237	0.521649
SCZ	Pt_0.295	0.406915	0.542554
SCZ	Pt_0.3	0.414248	0.55233
SCZ	Pt_0.305	0.410513	0.547351
SCZ	Pt_0.31	0.412891	0.550522
SCZ	Pt_0.315	0.386199	0.52264
SCZ	Pt_0.32	0.385848	0.514464
SCZ	Pt_0.325	0.398821	0.531761
SCZ	Pt_0.33	0.388286	0.517715
SCZ	Pt_0.335	0.392219	0.522959
SCZ	Pt_0.34	0.432184	0.576246
SCZ	Pt_0.345	0.433416	0.577888
SCZ	Pt_0.35	0.439175	0.585566
SCZ	Pt_0.355	0.415391	0.553854
SCZ	Pt_0.36	0.405345	0.54046
SCZ	Pt_0.365	0.41145	0.5486
SCZ	Pt_0.37	0.400089	0.533451
SCZ	Pt_0.375	0.412029	0.549372
SCZ	Pt_0.38	0.425597	0.567463
SCZ	Pt_0.385	0.423758	0.565011
SCZ	Pt_0.39	0.426691	0.568921
SCZ	Pt_0.395	0.440986	0.587981
SCZ	Pt_0.4	0.414344	0.552459
SCZ	Pt_0.405	0.395559	0.527412
SCZ	Pt_0.41	0.386644	0.515525
SCZ	Pt_0.415	0.389343	0.519124
SCZ	Pt_0.42	0.377889	0.503852
SCZ	Pt_0.425	0.346166	0.461555
SCZ	Pt_0.43	0.332264	0.475814
SCZ	Pt_0.435	0.310742	0.439813
SCZ	Pt_0.44	0.328236	0.437648
SCZ	Pt_0.445	0.333661	0.444882
SCZ	Pt_0.45	0.333659	0.462501
SCZ	Pt_0.455	0.342255	0.45634
SCZ	Pt_0.46	0.331377	0.477208
SCZ	Pt_0.465	0.336954	0.449272
SCZ	Pt_0.47	0.341039	0.467134
SCZ	Pt_0.475	0.358216	0.505042
SCZ	Pt_0.48	0.353705	0.534901
SCZ	Pt_0.485	0.369204	0.509017
SCZ	Pt_0.49	0.371126	0.494835
SCZ	Pt_0.495	0.374593	0.499458
SCZ	Pt_0.5	0.372962	0.497283
SCZ	Pt_1	0.330771	0.467451
SCZ	mean_z	0.522362	0.696483
Delayed Brain Development	Pt_0.005	0.00247901	0.0198321
Delayed Brain Development	Pt_0.01	3.36585e-05	0.000269268
Delayed Brain Development	Pt_0.015	2.99272e-05	0.000239418
Delayed Brain Development	Pt_0.02	8.84538e-05	0.000707631
Delayed Brain Development	Pt_0.025	9.65968e-06	7.72774e-05
Delayed Brain Development	Pt_0.03	1.50058e-05	0.000120046
Delayed Brain Development	Pt_0.035	2.07448e-06	1.65958e-05
Delayed Brain Development	Pt_0.04	2.91763e-06	2.3341e-05
Delayed Brain Development	Pt_0.045	3.33544e-06	2.66836e-05
Delayed Brain Development	Pt_0.05	2.98539e-06	2.38832e-05
Delayed Brain Development	Pt_0.055	3.95177e-06	3.16142e-05
Delayed Brain Development	Pt_0.06	6.94354e-06	5.55484e-05
Delayed Brain Development	Pt_0.065	7.21532e-06	5.77225e-05
Delayed Brain Development	Pt_0.07	7.75732e-06	6.20586e-05
Delayed Brain Development	Pt_0.075	4.827e-06	3.8616e-05
Delayed Brain Development	Pt_0.08	2.43164e-06	1.94532e-05
Delayed Brain Development	Pt_0.085	6.30152e-06	5.04121e-05
Delayed Brain Development	Pt_0.09	1.4181e-06	1.13448e-05
Delayed Brain Development	Pt_0.095	5.64644e-07	4.51715e-06
Delayed Brain Development	Pt_0.1	8.68286e-08	6.94629e-07
Delayed Brain Development	Pt_0.105	1.91522e-08	1.53218e-07
Delayed Brain Development	Pt_0.11	9.84168e-09	7.87335e-08
Delayed Brain Development	Pt_0.115	6.33043e-09	5.06434e-08
Delayed Brain Development	Pt_0.12	1.17498e-08	9.39987e-08
Delayed Brain Development	Pt_0.125	1.79107e-08	1.43286e-07
Delayed Brain Development	Pt_0.13	3.00385e-08	2.40308e-07
Delayed Brain Development	Pt_0.135	1.97522e-08	1.58018e-07
Delayed Brain Development	Pt_0.14	1.59394e-08	1.27516e-07
Delayed Brain Development	Pt_0.145	1.09322e-08	8.74574e-08
Delayed Brain Development	Pt_0.15	1.02176e-08	8.17405e-08
Delayed Brain Development	Pt_0.155	2.11962e-08	1.69569e-07
Delayed Brain Development	Pt_0.16	3.87083e-08	3.09667e-07
Delayed Brain Development	Pt_0.165	3.74861e-08	2.99889e-07
Delayed Brain Development	Pt_0.17	3.97158e-08	3.17727e-07
Delayed Brain Development	Pt_0.175	4.06819e-08	3.25455e-07
Delayed Brain Development	Pt_0.18	7.17269e-08	5.73815e-07
Delayed Brain Development	Pt_0.185	9.00213e-08	7.2017e-07
Delayed Brain Development	Pt_0.19	1.01931e-07	8.15452e-07
Delayed Brain Development	Pt_0.195	1.7798e-07	1.42384e-06
Delayed Brain Development	Pt_0.2	1.21518e-07	9.72141e-07
Delayed Brain Development	Pt_0.205	2.04968e-07	1.63974e-06
Delayed Brain Development	Pt_0.21	1.76453e-07	1.41163e-06
Delayed Brain Development	Pt_0.215	1.94293e-07	1.55435e-06
Delayed Brain Development	Pt_0.22	3.07844e-07	2.46275e-06
Delayed Brain Development	Pt_0.225	3.12482e-07	2.49985e-06
Delayed Brain Development	Pt_0.23	2.16482e-07	1.73185e-06
Delayed Brain Development	Pt_0.235	2.0572e-07	1.64576e-06
Delayed Brain Development	Pt_0.24	2.29425e-07	1.8354e-06
Delayed Brain Development	Pt_0.245	3.45776e-07	2.7662e-06
Delayed Brain Development	Pt_0.25	2.21407e-07	1.77126e-06
Delayed Brain Development	Pt_0.255	1.58581e-07	1.26865e-06
Delayed Brain Development	Pt_0.26	1.75863e-07	1.40691e-06
Delayed Brain Development	Pt_0.265	2.187e-07	1.7496e-06
Delayed Brain Development	Pt_0.27	2.23269e-07	1.78615e-06
Delayed Brain Development	Pt_0.275	2.59792e-07	2.07833e-06
Delayed Brain Development	Pt_0.28	2.29762e-07	1.8381e-06
Delayed Brain Development	Pt_0.285	3.91928e-07	3.13542e-06
Delayed Brain Development	Pt_0.29	4.83066e-07	3.86453e-06
Delayed Brain Development	Pt_0.295	5.11722e-07	4.09377e-06
Delayed Brain Development	Pt_0.3	4.48916e-07	3.59133e-06
Delayed Brain Development	Pt_0.305	7.34714e-07	5.87771e-06
Delayed Brain Development	Pt_0.31	5.94064e-07	4.75251e-06
Delayed Brain Development	Pt_0.315	4.24005e-07	3.39204e-06
Delayed Brain Development	Pt_0.32	8.62283e-07	6.89827e-06
Delayed Brain Development	Pt_0.325	1.00704e-06	8.05633e-06
Delayed Brain Development	Pt_0.33	9.98125e-07	7.985e-06
Delayed Brain Development	Pt_0.335	8.64139e-07	6.91311e-06
Delayed Brain Development	Pt_0.34	6.85006e-07	5.48004e-06
Delayed Brain Development	Pt_0.345	4.79553e-07	3.83643e-06
Delayed Brain Development	Pt_0.35	5.27373e-07	4.21898e-06
Delayed Brain Development	Pt_0.355	6.75489e-07	5.40391e-06
Delayed Brain Development	Pt_0.36	1.08619e-06	8.68952e-06
Delayed Brain Development	Pt_0.365	6.16364e-07	4.93091e-06
Delayed Brain Development	Pt_0.37	8.28546e-07	6.62837e-06
Delayed Brain Development	Pt_0.375	7.00771e-07	5.60617e-06
Delayed Brain Development	Pt_0.38	9.31442e-07	7.45153e-06
Delayed Brain Development	Pt_0.385	1.26406e-06	1.01125e-05
Delayed Brain Development	Pt_0.39	1.04296e-06	8.34368e-06
Delayed Brain Development	Pt_0.395	1.02186e-06	8.17485e-06
Delayed Brain Development	Pt_0.4	1.31886e-06	1.05509e-05
Delayed Brain Development	Pt_0.405	1.68232e-06	1.34586e-05
Delayed Brain Development	Pt_0.41	1.88404e-06	1.50723e-05
Delayed Brain Development	Pt_0.415	1.86576e-06	1.49261e-05
Delayed Brain Development	Pt_0.42	1.5729e-06	1.25832e-05
Delayed Brain Development	Pt_0.425	1.00727e-06	8.05814e-06
Delayed Brain Development	Pt_0.43	8.05111e-07	6.44089e-06
Delayed Brain Development	Pt_0.435	8.75261e-07	7.00208e-06
Delayed Brain Development	Pt_0.44	6.27205e-07	5.01764e-06
Delayed Brain Development	Pt_0.445	7.14142e-07	5.71314e-06
Delayed Brain Development	Pt_0.45	7.72735e-07	6.18188e-06
Delayed Brain Development	Pt_0.455	7.96639e-07	6.37312e-06
Delayed Brain Development	Pt_0.46	7.55835e-07	6.04668e-06
Delayed Brain Development	Pt_0.465	7.71289e-07	6.17031e-06
Delayed Brain Development	Pt_0.47	5.22476e-07	4.17981e-06
Delayed Brain Development	Pt_0.475	5.51099e-07	4.40879e-06
Delayed Brain Development	Pt_0.48	6.31434e-07	5.05147e-06
Delayed Brain Development	Pt_0.485	4.73693e-07	3.78954e-06
Delayed Brain Development	Pt_0.49	4.41933e-07	3.53547e-06
Delayed Brain Development	Pt_0.495	4.36062e-07	3.48849e-06
Delayed Brain Development	Pt_0.5	4.12085e-07	3.29668e-06
Delayed Brain Development	Pt_1	2.15583e-07	1.72466e-06
Delayed Brain Development	mean_z	1.07333e-07	8.58666e-07
