# Supplementary material for: Population clustering of structural brain aging and its association with brain development
Source: eLife. 2024 Oct 18;13:RP94970. doi: 10.7554/eLife.94970 (PMC11488854; doi:10.7554/eLife.94970)
Supplement: Figure 7—source data 1. — The ‘last in, first out’ mirroring patterns between brain development and brain aging. [file elife-94970-fig7-data1.xlsx]

## Sheet: Sheet1
Fig.7 The “last in, first out” mirroring patterns between brain development and brain aging.
ROI	Fig.7a APC for IMAGEN	Fig.7a APC for UKB	Fig.7b Age 15 v.s. 55	Fig.7b Age 15 v.s. 75	Fig.7c Pattern 1	Fig.7c Pattern 2
bankssts	-0.091467	-0.712269	0.822729	-0.053375	1.45403	-1.12426
caudal anterior cingulate	0.491644	0.44873	2.03946	-1.85682	2.25612	0.03595
caudal middle frontal	-1.0022	1.07687	-0.854923	-1.51731	-1.06924	-0.491616
cuneus	0.095677	0.448848	-0.115672	-0.659231	-0.1834	0.417438
entorhinal	2.38493	1.21881	-1.52107	2.36333	-1.07787	-1.63068
fusiform	1.26013	-1.20366	2.22103	3.04499	2.23482	2.2631
inferior parietal	-1.16064	-1.32722	-0.626448	0.178897	-0.691108	-0.540982
inferior temporal	1.41997	-1.07035	3.25737	3.02782	3.18336	3.43805
isthmus cingulate	-0.095069	0.866031	-1.46196	-0.66624	-1.38993	-1.44759
lateral occipital	-0.055332	-1.05468	0.676169	0.632316	0.30799	1.03977
lateral orbitofrontal	0.431992	0.695001	0.420875	-0.035935	0.523382	0.437852
lingual	0.481928	0.265394	0.12024	0.227258	-0.106979	0.478376
medial orbitofrontal	0.018038	-1.26736	0.965901	0.67605	1.39047	0.293694
middle temporal	0.312098	-1.79876	2.23007	2.40938	1.98513	2.51208
parahippocampal	1.58122	-0.978796	1.34537	2.49139	0.987437	1.54503
paracentral	-0.41401	0.152986	-0.748691	-0.664453	-0.805749	-0.536019
pars opercularis	-0.655118	0.064002	-0.356256	-0.499772	-0.508124	-0.039968
pars orbitalis	-0.881776	-0.395959	0.476466	-0.679523	0.913196	-0.067789
pars triangularis	-1.09183	-0.766102	0.215076	-0.568865	0.179517	0.146463
pericalcarine	0.968135	2.52471	-1.04062	-1.43425	-0.652855	-0.858747
postcentral	-0.583125	0.494231	-1.63733	-0.996854	-1.60075	-1.48189
posterior cingulate	-0.076841	-0.805564	0.261356	0.522723	0.772974	-0.325485
precentral	0.268436	0.576206	-0.276297	-0.010241	-0.279617	-0.082715
precuneus	-0.647422	-0.068403	-0.89925	-0.829478	-0.95044	-1.16735
rostral anterior cingulate	0.696155	-0.420091	2.33726	0.528614	1.64865	2.92273
rostral middle frontal	-1.21296	-0.615827	0.182327	-0.10773	0.013055	0.384529
superior frontal	-1.16469	-0.150271	-0.367665	-0.122848	-0.530593	-0.016964
superior parietal	-1.17063	0.04593	-2.34488	-0.91386	-2.21551	-2.30203
superior temporal	0.10576	-0.796034	1.35132	1.05212	1.34641	1.38726
supramarginal	-0.993224	-0.041667	-1.15797	-0.861636	-0.972648	-1.25959
frontal pole	-2.0353	1.14	-2.70429	-3.63208	-3.25194	-1.91028
temporal pole	2.15611	N/A	N/A	N/A	N/A	N/A
transverse temporal	0.198588	1.80839	-2.02606	-0.243125	-2.25009	-1.34742
insula	0.46082	1.64687	-0.783657	-0.801241	-0.659696	-0.670938
