# Supplementary material for: Population clustering of structural brain aging and its association with brain development
Source: eLife. 2024 Oct 18;13:RP94970. doi: 10.7554/eLife.94970 (PMC11488854; doi:10.7554/eLife.94970)
Supplement: Figure 8—source data 1. — Functional enrichment of gene transcripts significantly associated with delayed brain development and accelerated brain aging. Each gene’s contribution to the first PLS component for IMAGEN and UKB. [file elife-94970-fig8-data1.xlsx]

## Sheet: Sheet1
Fig.8 Functional enrichment of gene transcripts significantly associated with delayed brain development and accelerated brain aging.
Gene Name	Gene ID	PLS1 weight for IMAGEN	PLS1 weight for UKB
A1BG	1	2.26314	1.19835
A1BG-AS1	2	0.214087	-3.44586
A2M	3	1.03079	2.28259
A2ML1	4	1.25507	3.94898
A3GALT2	5	-0.624742	2.67546
A4GALT	6	-0.712302	1.17311
AAAS	7	-5.28493	-1.14466
AACS	8	-0.797175	-5.3945
AADACL3	9	1.72012	4.60965
AADAT	10	-0.414348	-3.16431
AAED1	11	3.54657	3.22043
AAGAB	12	-0.774462	2.31992
AAK1	13	-2.00779	-0.361622
AAMDC	14	-0.180572	3.1317
AAMP	15	-0.944592	-4.17487
AANAT	16	1.24822	2.56302
AAR2	17	-0.281964	0.809751
AARD	18	-1.64885	-0.902612
AARS	19	-4.48125	-4.15356
AARS2	20	1.78335	1.32865
AASDH	21	1.21166	2.25348
AASDHPPT	22	-3.27929	-2.56452
AASS	23	0.61806	4.94123
AATF	24	-2.06658	1.50405
AATK	25	-1.67128	0.417005
ABAT	26	-0.650888	2.31355
ABCA1	27	5.52854	1.53728
ABCA10	28	-2.77556	-1.93307
ABCA11P	29	1.10365	0.998458
ABCA2	30	-1.09413	0.8674
ABCA3	31	0.509115	-3.64186
ABCA5	32	0.50368	-1.28245
ABCA6	33	-1.57214	1.39837
ABCA7	34	-1.53341	-0.34435
ABCA8	35	-1.14332	2.06917
ABCA9	36	-1.48357	2.55431
ABCB1	37	-0.612682	0.089823
ABCB10	38	-2.74426	-4.36471
ABCB6	39	1.72108	-2.44225
ABCB7	40	-0.680489	3.19072
ABCB8	41	-0.250991	2.70964
ABCB9	42	-1.20525	-0.82351
ABCC1	43	-1.12	1.52128
ABCC10	44	-1.80102	-2.2504
ABCC12	45	-1.92023	-4.61912
ABCC5	46	-0.739338	-2.41309
ABCC6	47	2.37652	-1.27681
ABCC8	48	-7.24034	-1.41045
ABCC9	49	-1.15629	2.22931
ABCD2	50	-0.416041	0.7249
ABCD3	51	-0.335869	4.80188
ABCD4	52	-1.72593	0.519133
ABCE1	53	-0.414946	1.70348
ABCF1	54	-1.4918	-4.16282
ABCF2	55	-5.40145	-4.40888
ABCF3	56	-1.02411	-5.37366
ABCG1	57	1.26389	3.24763
ABCG2	58	-0.241489	2.16322
ABCG4	59	-3.06133	-1.62747
ABCG8	60	2.18418	3.12673
ABHD1	61	2.94717	0.775294
ABHD10	62	-2.43658	-3.25529
ABHD11	63	1.04358	2.40256
ABHD12	64	-2.93508	1.83669
ABHD12B	65	-2.79217	-3.84076
ABHD13	66	-0.019106	-3.7678
ABHD14A	67	-3.00864	-2.9363
ABHD14B	68	-0.042499	-2.63559
ABHD16A	69	-0.65936	-5.58014
ABHD16B	70	-1.02704	3.0492
ABHD17A	71	-1.36487	0.107255
ABHD17B	72	-1.45975	3.69195
ABHD17C	73	2.3341	-1.00064
ABHD18	74	1.55768	1.61869
ABHD2	75	2.20442	1.41678
ABHD3	76	1.18361	2.96444
ABHD4	77	0.925816	4.59681
ABHD5	78	-0.471395	2.50533
ABHD6	79	-1.96291	2.03373
ABHD8	80	-2.43326	-4.29732
ABI1	81	2.53413	-1.83375
ABI2	82	2.37311	-2.55407
ABI3	83	3.94155	2.78323
ABL1	84	-0.572805	3.2866
ABL2	85	0.390926	0.409345
ABLIM1	86	0.284862	2.11589
ABLIM2	87	-4.07566	-3.9219
ABLIM3	88	2.38523	2.0908
ABR	89	1.23804	-2.08232
ABRACL	90	-2.32365	-3.11102
ABRAXAS2	91	1.78624	2.97397
ABT1	92	-1.40287	-4.31133
ABTB1	93	-6.17247	-3.17277
ABTB2	94	-0.217997	3.10315
ACAA1	95	0.787157	1.98597
ACAA2	96	2.14745	0.641338
ACACA	97	0.047151	-0.371625
ACACB	98	-0.442689	4.41508
ACAD10	99	2.44748	3.99683
ACAD11	100	-2.04192	0.685569
ACAD8	101	-0.177843	-2.71424
ACAD9	102	0.271591	-2.90131
ACADL	103	3.69718	0.937137
ACADM	104	-0.819681	1.27433
ACADSB	105	1.93034	2.33802
ACADVL	106	-0.170254	2.2684
ACAN	107	-2.88776	0.979938
ACAP2	108	-0.285497	2.20907
ACAP3	109	2.41181	3.74419
ACAT1	110	-1.63199	-3.99282
ACAT2	111	-0.616616	-2.66185
ACBD3	112	-0.471393	-2.00016
ACBD4	113	2.32381	3.27716
ACBD5	114	0.439541	4.46059
ACBD6	115	-0.577386	-0.444689
ACBD7	116	2.66656	0.532805
ACCS	117	4.56934	0.685471
ACD	118	-1.27316	-4.45068
ACE	119	-0.751818	-2.68449
ACER2	120	-1.99573	-2.40778
ACER3	121	-2.91725	1.709
ACHE	122	-0.486408	0.518589
ACIN1	123	1.75728	4.55453
ACKR1	124	1.6239	-0.978587
ACKR2	125	0.491336	1.36865
ACKR3	126	1.24542	-0.438991
ACKR4	127	0.650832	4.30281
ACLY	128	1.11413	1.68247
ACO1	129	1.5602	3.34762
ACO2	130	1.24759	-0.737446
ACOT11	131	0.798441	1.16781
ACOT13	132	-0.457923	0.445359
ACOT2	133	5.14601	-0.691232
ACOT4	134	-2.54212	-4.866
ACOT7	135	-0.990611	-4.49522
ACOT8	136	0.324436	-1.72781
ACOT9	137	1.1103	0.752522
ACOX1	138	2.25495	0.70946
ACOX2	139	4.88976	0.560394
ACOX3	140	0.99209	-0.204528
ACP1	141	3.38724	-0.800026
ACP2	142	0.829064	0.609159
ACP5	143	2.0412	4.05665
ACP6	144	0.228686	1.06248
ACPP	145	1.2589	1.56004
ACR	146	-1.32431	-0.703332
ACRBP	147	0.459254	4.7556
ACSBG1	148	4.61024	2.04458
ACSF2	149	5.50257	0.467773
ACSF3	150	-4.21713	-3.88402
ACSL1	151	-1.12173	1.86757
ACSL3	152	-5.01819	-3.43389
ACSL4	153	2.77328	0.620816
ACSL6	154	-0.631331	0.736849
ACSM1	155	0.342282	4.22556
ACSM2A	156	0.253644	3.7359
ACSM5	157	-0.011922	0.987069
ACSS1	158	0.848989	1.17022
ACSS2	159	-3.13477	-0.073664
ACSS3	160	-0.056843	1.84849
ACTA1	161	-0.851941	-3.90004
ACTA2	162	1.767	1.48363
ACTB	163	-0.782849	-2.82083
ACTBL2	164	1.32564	3.30472
ACTC1	165	-1.08752	-3.05931
ACTG1	166	3.57465	-1.38021
ACTG1P4	167	3.64475	0.141433
ACTG2	168	2.41926	2.30543
ACTL10	169	-1.13367	2.08559
ACTL6A	170	-0.360869	4.15822
ACTL6B	171	-1.90803	-4.51575
ACTL8	172	-0.178083	2.9804
ACTN1	173	-0.294535	-2.19831
ACTN2	174	-2.70948	-4.41036
ACTN4	175	-5.40159	-1.53175
ACTR10	176	2.01103	-2.67791
ACTR1A	177	0.936071	-2.12547
ACTR1B	178	-4.3167	-4.44148
ACTR2	179	0.384598	-1.73306
ACTR3	180	2.66501	2.68697
ACTR3B	181	2.64149	-0.45701
ACTR3BP2	182	1.62024	1.14178
ACTR3C	183	2.78014	3.1463
ACTR5	184	-1.12973	-1.85285
ACTR6	185	-2.66604	-2.78182
ACTR8	186	1.18266	1.41501
ACTRT3	187	0.976451	-0.783131
ACVR1	188	0.806442	2.77807
ACVR1B	189	-1.29319	-3.75324
ACVR1C	190	-3.9904	-0.026042
ACVR2A	191	3.57637	-0.222515
ACVR2B	192	1.28828	-1.52845
ACVRL1	193	-0.75521	-0.064213
ACY3	194	1.20712	2.55003
ACYP1	195	-0.882871	-4.16379
ACYP2	196	-3.36558	0.685952
ADA	197	-0.338733	1.25998
ADA2	198	2.78961	4.95083
ADAD2	199	1.10076	0.977526
ADAL	200	-1.19407	3.24942
ADAM10	201	1.75963	3.17256
ADAM11	202	-2.47454	-4.09389
ADAM15	203	-0.650442	3.47733
ADAM17	204	0.06864	-2.01877
ADAM19	205	1.71139	1.93737
ADAM20	206	-2.1205	-0.351822
ADAM20P1	207	-3.75204	-2.93162
ADAM22	208	-6.43114	-2.26811
ADAM23	209	-5.53217	-1.69251
ADAM28	210	1.97987	2.80114
ADAM29	211	0.75301	2.96156
ADAM33	212	1.40682	3.61257
ADAM7	213	0.870947	3.85828
ADAM8	214	-2.40455	-1.2236
ADAM9	215	-1.97556	0.557024
ADAMTS1	216	-1.09996	2.55918
ADAMTS10	217	-2.18479	-3.21491
ADAMTS13	218	-1.51724	1.04723
ADAMTS14	219	-1.09212	2.43815
ADAMTS19	220	0.655952	0.575687
ADAMTS2	221	-2.54707	-0.449887
ADAMTS4	222	-1.47606	1.85929
ADAMTS5	223	-1.24744	-0.898585
ADAMTS7	224	-1.05693	0.367372
ADAMTS8	225	0.398571	-2.75687
ADAMTS9	226	1.89289	2.20926
ADAMTSL1	227	1.06757	3.04628
ADAMTSL2	228	-0.571429	-0.792413
ADAMTSL3	229	0.214476	3.21876
ADAMTSL5	230	-0.04858	4.02197
ADAP1	231	-0.395372	-1.20757
ADAP2	232	5.75413	3.12184
ADAR	233	0.061145	-4.29738
ADARB1	234	0.054521	-2.56557
ADARB2	235	-0.395518	3.5306
ADARB2-AS1	236	-1.37621	3.6364
ADAT1	237	-2.4527	-2.84074
ADAT2	238	0.62322	-0.124493
ADAT3	239	-1.7311	1.46348
ADCK1	240	-0.816549	-4.20605
ADCK2	241	-1.43867	-4.70322
ADCK5	242	0.097949	-3.52711
ADCY1	243	-2.98052	0.796883
ADCY10P1	244	-0.276578	3.63617
ADCY2	245	0.121291	-2.86249
ADCY3	246	-0.527402	0.001373
ADCY4	247	-0.727978	0.868904
ADCY5	248	0.504704	3.45112
ADCY6	249	0.598502	-3.41319
ADCY7	250	-0.675815	-1.49771
ADCY8	251	2.38527	3.18919
ADCY9	252	-1.75896	-0.837914
ADCYAP1	253	-2.18909	-4.18827
ADCYAP1R1	254	4.96501	2.68816
ADD1	255	-5.58402	-0.063877
ADD2	256	0.193879	-1.10941
ADD3	257	1.81383	0.594452
ADGRA1	258	-3.55761	-2.01281
ADGRA2	259	-4.59952	-1.13399
ADGRA3	260	3.46082	0.57389
ADGRB1	261	1.05498	-3.29113
ADGRB2	262	-0.315535	-4.22297
ADGRB3	263	1.35627	-3.84649
ADGRE5	264	-1.41678	1.12801
ADGRF5	265	-0.987064	-3.45032
ADGRG1	266	3.37666	0.213628
ADGRG5	267	2.44623	4.35834
ADGRG6	268	0.586187	3.91572
ADGRL1	269	-0.452117	-2.61057
ADGRL2	270	-1.92098	-2.4864
ADGRL3	271	2.97516	-1.89678
ADGRL4	272	-2.75174	0.054843
ADGRV1	273	7.42676	0.462674
ADH1C	274	-0.424469	3.24141
ADH5	275	4.35959	3.13275
ADHFE1	276	3.14588	1.13205
ADI1	277	5.80259	2.24925
ADIPOR1	278	1.87128	4.04102
ADIPOR2	279	-0.728645	2.0891
ADIRF	280	6.80225	1.74499
ADK	281	0.358128	3.36866
ADM	282	-2.52079	3.02108
ADM5	283	2.45107	-2.13251
ADNP	284	-0.701773	-4.52438
ADNP-AS1	285	2.42914	3.45358
ADNP2	286	-3.71457	-1.54223
ADO	287	-5.32123	-2.28847
ADORA1	288	-3.04717	-4.01802
ADORA2B	289	2.74044	-0.250817
ADPGK	290	0.489359	-2.42856
ADPRHL1	291	-4.45533	-4.16706
ADPRHL2	292	-0.994028	-3.76277
ADPRM	293	-0.573746	2.58738
ADRA1A	294	0.034501	-0.818276
ADRA1B	295	-0.126579	-2.04693
ADRA1D	296	-3.15939	-5.46145
ADRA2A	297	-2.42247	0.409823
ADRA2C	298	2.83297	0.651304
ADRB1	299	-3.09237	-2.62152
ADRB2	300	1.91545	1.19015
ADRM1	301	-1.80073	-4.34065
ADSL	302	2.29975	-1.92714
ADSS	303	1.03635	-2.73489
ADSSL1	304	-3.21991	1.4052
ADTRP	305	-1.09584	-3.32192
AEBP1	306	0.131103	2.19842
AEBP2	307	-3.55555	-1.66472
AES	308	0.695072	-2.55169
AFAP1	309	1.58383	-2.06239
AFAP1L1	310	-4.82576	-2.90326
AFAP1L2	311	-3.00344	-0.864782
AFDN	312	1.51544	4.20315
AFDN-DT	313	1.65948	2.64543
AFF1	314	-0.427718	3.85979
AFF2	315	3.22716	4.35154
AFF3	316	2.03281	3.76159
AFF4	317	2.14622	4.41084
AFG1L	318	-4.80413	-1.49487
AFG3L1P	319	1.03436	1.80084
AFG3L2	320	-0.051065	-0.256631
AFMID	321	-0.269169	3.03181
AFTPH	322	-5.31068	-1.47657
AGA	323	1.19714	2.90249
AGAP1	324	2.10024	0.763061
AGAP11	325	0.74257	1.2776
AGAP2	326	4.54686	3.84662
AGAP2-AS1	327	1.21491	2.30399
AGAP3	328	3.32933	0.647049
AGAP5	329	0.887594	-0.166948
AGBL2	330	1.83403	2.76266
AGBL3	331	1.20554	3.75918
AGBL4	332	-2.18177	-5.01914
AGBL5	333	-0.656115	2.52483
AGER	334	1.68329	4.57881
AGFG1	335	-0.832298	-1.44674
AGFG2	336	3.14724	0.17532
AGGF1	337	-1.39364	-1.64795
AGK	338	0.591851	-0.166418
AGL	339	1.37752	4.19758
AGMAT	340	-1.75817	-1.67444
AGO1	341	-4.38329	-0.587564
AGO2	342	-1.8193	-1.15965
AGO3	343	-1.16527	2.3401
AGO4	344	0.129338	-1.62395
AGPAT1	345	1.96717	1.71461
AGPAT3	346	-4.51139	-1.26266
AGPAT4	347	-0.88915	0.414139
AGPAT4-IT1	348	-0.604129	1.9927
AGPAT5	349	2.74364	2.97606
AGPS	350	-0.929366	2.5929
AGRN	351	-0.607845	-0.572221
AGT	352	5.46341	1.42725
AGTPBP1	353	-1.21215	-1.95813
AGTRAP	354	-0.240739	2.44573
AGXT	355	0.928104	2.14922
AHCTF1	356	1.31838	2.11727
AHCY	357	2.81566	1.37293
AHCYL1	358	0.954716	2.43239
AHCYL2	359	-0.751918	-1.48278
AHDC1	360	1.17504	1.29396
AHI1	361	-0.937836	-2.48988
AHNAK	362	1.20141	4.50369
AHNAK2	363	-2.59224	-2.15365
AHR	364	0.709933	-2.90258
AHRR	365	2.87982	-0.909481
AHSA1	366	-2.62941	-2.96431
AHSA2P	367	-0.967271	1.75531
AHSG	368	-1.2258	-4.46919
AIDA	369	-0.978249	2.00226
AIF1	370	1.6696	1.77803
AIF1L	371	-1.12789	2.89707
AIFM1	372	-4.30483	-2.54107
AIFM2	373	0.616313	-1.47134
AIFM3	374	-2.25011	-0.578634
AIG1	375	1.72372	2.73242
AIM2	376	2.31088	3.77976
AIMP1	377	0.299725	0.26661
AIMP2	378	-1.34403	-1.48189
AIP	379	-3.14977	-1.10778
AIRE	380	-1.00499	0.494869
AJAP1	381	0.314498	-0.944864
AJM1	382	2.10415	4.07738
AK1	383	-2.23149	0.53693
AK2	384	-2.73104	2.25643
AK3	385	0.536067	4.51888
AK4	386	6.42528	0.788502
AK5	387	0.957191	-0.944654
AK6	388	0.206668	-1.56135
AK8	389	3.47189	1.68084
AK9	390	-1.91405	-1.47832
AKAIN1	391	-0.403467	-0.938027
AKAP1	392	-0.930262	2.22101
AKAP10	393	-0.571419	1.88347
AKAP11	394	-2.37561	-5.61789
AKAP12	395	-2.51916	-3.79732
AKAP13	396	0.518224	-0.197467
AKAP17A	397	-1.31841	-0.377035
AKAP5	398	1.15482	0.04293
AKAP6	399	-3.91231	-3.76938
AKAP7	400	-1.14597	0.481969
AKAP8	401	-1.87912	-3.49596
AKAP8L	402	-0.218843	-2.93211
AKAP9	403	-0.128595	-3.94119
AKIP1	404	-1.58977	-1.51768
AKIRIN1	405	2.51557	3.23889
AKIRIN2	406	2.74221	3.78253
AKR1A1	407	-2.48014	-3.7514
AKR1B1	408	-0.207355	-4.18955
AKR1C1	409	1.65362	3.04599
AKR1C3	410	1.4826	1.88209
AKR1C4	411	1.62274	3.13628
AKR1E2	412	-1.52312	0.64594
AKR7A2	413	5.91235	0.53533
AKR7A2P1	414	1.45874	-3.35937
AKR7A3	415	3.78458	0.102608
AKR7L	416	6.65173	1.08018
AKT1	417	0.917566	-2.81885
AKT1S1	418	-1.90055	3.03818
AKT2	419	0.986785	-1.83673
AKT3	420	-1.40005	-3.94076
AKTIP	421	0.644524	0.660506
ALAD	422	-0.951802	3.57717
ALAS1	423	-2.8949	-5.12242
ALAS2	424	0.337236	4.11466
ALB	425	2.4372	3.36362
ALCAM	426	1.08063	3.68826
ALDH16A1	427	-0.405057	2.31145
ALDH18A1	428	1.14861	0.004968
ALDH1A1	429	-2.90335	1.84541
ALDH1A3	430	-4.22269	-1.19596
ALDH1B1	431	-4.03266	0.561633
ALDH1L1	432	3.59078	-0.113809
ALDH1L2	433	-2.66714	-3.50792
ALDH2	434	4.14128	0.311889
ALDH3A2	435	-1.32235	1.15716
ALDH3B1	436	0.058913	3.78828
ALDH4A1	437	1.71308	-0.110062
ALDH5A1	438	2.95854	3.56921
ALDH6A1	439	1.36714	0.857975
ALDH7A1	440	1.57098	3.09073
ALDH8A1	441	1.18549	3.07555
ALDH9A1	442	9.24396	1.54286
ALDOA	443	-0.778489	-4.80335
ALDOC	444	-2.22335	-1.82567
ALG1	445	-0.573124	0.769936
ALG10	446	0.052107	-0.86347
ALG10B	447	-1.31428	-1.41565
ALG11	448	-1.14746	0.879918
ALG12	449	-0.014279	3.08747
ALG13	450	-2.72901	-4.36241
ALG14	451	-0.538298	1.44736
ALG1L	452	2.72855	-0.447501
ALG2	453	0.531296	1.53881
ALG3	454	-3.94026	0.436172
ALG5	455	0.121237	0.836974
ALG6	456	-2.73088	-1.365
ALG8	457	3.90007	2.75018
ALG9	458	-0.075106	3.8763
ALK	459	1.81474	0.442633
ALKAL1	460	0.657298	0.869729
ALKAL2	461	6.24646	1.49603
ALKBH1	462	-0.369118	-2.04023
ALKBH2	463	-3.16578	0.107229
ALKBH3	464	-3.48196	-4.01222
ALKBH4	465	-1.207	-2.41159
ALKBH5	466	1.44	0.873304
ALKBH6	467	-2.51817	-3.3962
ALKBH7	468	0.961134	-0.728812
ALKBH8	469	-0.83676	0.002048
ALMS1	470	0.264492	4.30416
ALMS1P1	471	2.56142	5.08018
ALOX12B	472	-2.39691	-3.97507
ALOX12P2	473	0.818823	1.46319
ALOX15B	474	-1.27474	-0.684758
ALOX5	475	3.94341	1.35403
ALOX5AP	476	1.46261	2.45037
ALOXE3	477	-0.562256	-0.289413
ALPK1	478	1.84237	3.00443
ALPL	479	0.082744	-3.11237
ALPP	480	-0.68306	3.94523
ALPPL2	481	1.84097	2.15378
ALS2	482	-0.487726	-4.13132
ALS2CL	483	-3.37315	-3.65899
ALS2CR12	484	1.87606	3.70665
ALX3	485	-2.3901	1.77412
ALYREF	486	1.89772	-0.925377
AMACR	487	-1.22227	-1.54249
AMBRA1	488	0.939026	-2.54074
AMD1	489	-1.49629	1.4166
AMDHD1	490	-2.5539	-1.29666
AMDHD2	491	2.811	4.35963
AMER1	492	-2.84053	-3.44853
AMER2	493	-0.099638	3.0217
AMER3	494	-0.749008	-4.48805
AMFR	495	1.03026	-0.456325
AMH	496	-1.60545	-0.094142
AMIGO1	497	-2.11615	-4.17428
AMIGO2	498	1.32798	-1.54072
AMIGO3	499	2.03529	2.7455
AMMECR1	500	-2.09598	-0.745972
AMMECR1L	501	-3.15051	-1.82008
AMN	502	1.2017	2.46624
AMN1	503	0.435909	-2.16017
AMOT	504	0.043497	2.81385
AMOTL1	505	-0.526854	3.82165
AMOTL2	506	-1.41186	0.277286
AMPD2	507	1.28578	-2.32627
AMPD3	508	-2.68286	1.7567
AMPH	509	-0.11628	-4.96408
AMT	510	-0.024947	-0.164213
AMY2A	511	0.872023	-2.24484
AMZ1	512	2.73716	2.25684
AMZ2	513	-1.73134	-3.06798
AMZ2P1	514	0.259282	-1.70219
ANAPC1	515	-2.56403	0.113344
ANAPC10	516	-2.86484	-2.02606
ANAPC11	517	0.261748	-0.749138
ANAPC13	518	1.31604	1.19901
ANAPC15	519	-1.20086	-1.99894
ANAPC16	520	0.037994	-0.708552
ANAPC2	521	-3.0168	-3.21775
ANAPC4	522	0.203688	0.283008
ANAPC5	523	-0.984188	-0.336304
ANAPC7	524	-1.4119	-1.91309
ANG	525	0.588636	1.36698
ANGEL1	526	-1.60491	0.277535
ANGEL2	527	0.237043	-3.20981
ANGPT1	528	1.1783	3.52
ANGPT2	529	-0.896874	2.24585
ANGPT4	530	1.02142	4.19905
ANGPTL2	531	-1.07801	3.00177
ANGPTL4	532	-0.058396	1.56042
ANGPTL6	533	-0.820414	-2.72731
ANHX	534	1.48958	2.27336
ANK1	535	-3.50247	-0.482971
ANK2	536	1.63337	3.55018
ANK3	537	1.52477	-0.004609
ANKAR	538	-0.905689	4.23078
ANKDD1A	539	4.17478	0.512262
ANKFY1	540	-1.47297	2.44952
ANKH	541	-4.07391	-1.44476
ANKHD1	542	-0.38884	-1.72943
ANKIB1	543	1.81004	5.04153
ANKK1	544	-1.81699	-0.607669
ANKLE2	545	-0.123965	-1.69248
ANKMY2	546	0.539884	-0.077626
ANKRA2	547	0.56994	2.82431
ANKRD10	548	1.04301	-3.97135
ANKRD11	549	1.15375	0.790188
ANKRD12	550	0.139583	0.279174
ANKRD13A	551	-1.26485	3.17776
ANKRD13B	552	0.623099	-0.474824
ANKRD13C	553	-1.08117	-2.3489
ANKRD13D	554	-1.23045	-2.14655
ANKRD16	555	-0.435443	-0.647084
ANKRD17	556	1.08703	1.93146
ANKRD18A	557	1.79614	5.01209
ANKRD18B	558	1.97639	1.59064
ANKRD18CP	559	1.81984	3.16448
ANKRD18DP	560	-1.3927	-0.478263
ANKRD19P	561	4.33172	0.416551
ANKRD2	562	-2.41186	-4.22832
ANKRD20A11P	563	1.77998	0.860752
ANKRD20A12P	564	-0.961814	2.51206
ANKRD20A4-ANKRD20A20P	565	-2.19087	-0.187042
ANKRD20A5P	566	1.8332	-0.836034
ANKRD20A8P	567	-1.82945	1.29874
ANKRD20A9P	568	-0.132907	0.432659
ANKRD23	569	-1.30937	1.77366
ANKRD24	570	-4.31596	-3.82011
ANKRD26	571	-0.494956	-0.369274
ANKRD27	572	-3.37735	-2.03639
ANKRD28	573	-2.05701	-3.50411
ANKRD29	574	-2.49303	0.782398
ANKRD30B	575	-1.04421	-4.20129
ANKRD30BP2	576	2.36299	-1.7234
ANKRD33	577	1.50231	2.52856
ANKRD33B	578	-2.61905	-2.84774
ANKRD34A	579	-2.23502	-4.76342
ANKRD34C	580	-5.41749	-1.68805
ANKRD35	581	1.47722	-0.677707
ANKRD36B	582	0.889088	2.63844
ANKRD36BP1	583	0.526944	3.16556
ANKRD36BP2	584	1.39594	5.35473
ANKRD36C	585	0.924284	2.50865
ANKRD37	586	-4.98296	-1.51987
ANKRD39	587	-1.28497	-3.35485
ANKRD40	588	-1.12494	2.88119
ANKRD42	589	-1.40644	0.76047
ANKRD44	590	1.07076	4.84223
ANKRD45	591	2.14795	2.69853
ANKRD46	592	-1.32962	-4.14056
ANKRD49	593	0.64111	-0.11571
ANKRD50	594	3.47252	0.508802
ANKRD52	595	0.118048	3.63767
ANKRD53	596	1.03553	2.25012
ANKRD54	597	1.47277	-1.42039
ANKRD6	598	4.79441	-1.08492
ANKRD65	599	-1.68291	-0.084698
ANKRD9	600	-3.20677	-2.49621
ANKS1A	601	-0.71797	-0.36124
ANKS1B	602	0.600233	0.182184
ANKS3	603	-4.96341	-0.740255
ANKS6	604	-4.01166	-0.64979
ANKZF1	605	-3.11544	-0.64746
ANLN	606	-0.705982	2.61794
ANO10	607	1.56632	1.81057
ANO2	608	3.79001	1.65833
ANO3	609	-0.181626	-2.34192
ANO4	610	-2.01845	2.35629
ANO5	611	-2.66061	-4.80848
ANO6	612	1.1675	4.297
ANO7	613	-2.667	0.488741
ANO8	614	-0.05607	-0.496244
ANOS1	615	4.09766	0.777434
ANP32A	616	1.42146	-0.266561
ANP32A-IT1	617	0.404291	2.97742
ANP32AP1	618	2.29221	3.57699
ANP32B	619	-0.939052	3.95837
ANP32C	620	1.88202	3.37526
ANP32D	621	2.13287	5.22951
ANP32E	622	5.25223	2.84378
ANTXR1	623	3.94322	1.09904
ANTXR2	624	-0.366106	3.0333
ANXA1	625	-0.059736	0.868149
ANXA11	626	1.03058	-3.40004
ANXA2	627	2.92943	1.45349
ANXA2P1	628	1.90582	1.96936
ANXA2R	629	1.64995	4.37288
ANXA3	630	-1.69217	-0.179309
ANXA4	631	-1.06801	0.095974
ANXA5	632	-0.699518	3.78067
ANXA6	633	-1.02052	-3.05071
ANXA7	634	1.21836	-1.86287
AOAH	635	2.38841	3.34
AOC2	636	-0.461894	-4.1435
AOC3	637	1.87338	2.46703
AP1AR	638	1.09881	1.06111
AP1B1	639	-2.05062	-4.84549
AP1G1	640	-0.681826	-0.034803
AP1G2	641	0.556586	-1.49467
AP1M1	642	-0.507513	-4.82686
AP1S1	643	1.51076	-2.73515
AP1S2	644	-1.35886	-1.92655
AP1S3	645	0.609682	2.64333
AP2A1	646	-1.41703	-3.14315
AP2A2	647	0.49277	-2.16543
AP2B1	648	5.41259	1.36685
AP2M1	649	-1.16362	-4.73209
AP2S1	650	-0.686139	-4.2301
AP3B1	651	0.03576	4.90436
AP3B2	652	0.899228	-4.85916
AP3D1	653	1.72634	-2.24604
AP3M1	654	0.16368	3.62599
AP3M2	655	-0.02296	-3.75733
AP3S1	656	5.68226	-0.192279
AP4B1	657	-0.306266	-4.7987
AP4E1	658	-4.78575	-0.050184
AP4M1	659	-2.75921	-4.56343
AP4S1	660	-2.18846	-3.48161
AP5B1	661	1.24508	-2.05515
AP5M1	662	-2.29933	-0.860471
AP5S1	663	3.44473	1.45049
AP5Z1	664	-1.41394	-3.46305
APAF1	665	4.56166	0.78321
APBA1	666	3.12582	2.01421
APBA2	667	-1.41648	-5.01718
APBA3	668	-0.699019	0.764321
APBB1	669	-1.68857	-4.53068
APBB1IP	670	3.7095	2.54258
APBB2	671	-1.531	2.61026
APBB3	672	-0.902104	-4.92656
APC	673	2.21662	1.25763
APC2	674	-0.207363	2.2958
APCDD1	675	1.55546	1.20269
APCDD1L	676	0.366972	3.83865
APCS	677	-0.471764	2.5772
APEH	678	-1.57869	-3.97056
APEX1	679	-0.023218	-3.93815
APEX2	680	-0.718583	-1.48604
APH1A	681	0.036363	0.120601
APH1B	682	0.42142	2.72783
API5	683	-3.43144	-2.26513
APIP	684	-2.85548	1.68851
APLN	685	2.67425	2.02802
APLNR	686	2.73573	3.04652
APLP1	687	0.433808	-1.00536
APLP2	688	-1.08328	-4.21084
APMAP	689	1.22292	-4.21258
APOA1	690	1.1805	3.32821
APOC1	691	4.57606	1.73286
APOD	692	-0.08508	3.58285
APOE	693	4.22074	1.1615
APOL1	694	-3.02079	-0.996735
APOL2	695	-4.48983	-1.98148
APOL3	696	-0.668825	1.88811
APOL4	697	-1.41546	-4.07057
APOL5	698	-0.061046	3.50188
APOL6	699	1.66075	2.22956
APOLD1	700	-1.9936	0.371864
APOM	701	1.11949	2.3396
APOO	702	-0.870299	-2.24491
APOOL	703	0.376166	3.40702
APOPT1	704	5.1384	1.50723
APP	705	-1.07876	2.032
APPBP2	706	-5.71389	-2.99228
APPL1	707	-1.73841	0.21182
APPL2	708	3.06511	4.45997
APRT	709	0.860782	1.01557
APTR	710	6.3586	0.325003
APTX	711	2.11043	4.42396
AQP1	712	0.843303	1.73899
AQP11	713	-1.61946	-4.17896
AQP2	714	1.64403	4.3057
AQP4	715	4.15741	1.05366
AQP5	716	3.96157	2.58035
AQP6	717	2.06055	3.07124
AQP7	718	0.213327	-1.61687
AQP7P1	719	0.44437	4.18336
AQR	720	-0.557758	2.31246
AR	721	-5.81497	-0.956981
ARAF	722	1.48532	2.30477
ARAP1	723	0.346812	4.06601
ARAP2	724	-2.70402	-1.16862
ARAP3	725	-2.78645	-3.16303
ARC	726	-5.09373	-1.17154
ARCN1	727	-0.408211	2.47862
AREL1	728	1.32979	-0.213349
ARF1	729	2.0907	-2.70798
ARF3	730	-0.316716	-3.10348
ARF4	731	1.73014	-2.0529
ARF5	732	-3.13987	-4.95641
ARF6	733	-0.745657	-4.06166
ARFGAP1	734	-3.02712	-1.0468
ARFGAP2	735	1.46346	-2.07164
ARFGAP3	736	2.16507	-1.48209
ARFGEF1	737	-0.478327	-4.03976
ARFGEF2	738	-1.36563	1.09277
ARFGEF3	739	2.31687	-1.7809
ARFIP1	740	-0.336389	-1.55221
ARFIP2	741	-1.55644	-5.50678
ARFRP1	742	-0.490391	1.2022
ARG2	743	-2.11186	-0.471506
ARGLU1	744	1.66293	3.42628
ARHGAP1	745	-0.683708	0.180993
ARHGAP10	746	-2.89409	-2.8426
ARHGAP12	747	0.93524	-1.20815
ARHGAP17	748	0.465599	3.74317
ARHGAP18	749	3.82638	3.60245
ARHGAP19	750	0.295477	3.97989
ARHGAP20	751	-1.73473	-5.06043
ARHGAP21	752	-1.67028	-0.76695
ARHGAP22	753	-0.009044	3.77111
ARHGAP23	754	-0.152558	3.65506
ARHGAP24	755	1.04853	0.934115
ARHGAP25	756	-1.88272	-2.41929
ARHGAP26	757	-4.71927	-2.32688
ARHGAP27	758	0.669152	4.01582
ARHGAP27P1	759	-0.801415	0.182638
ARHGAP27P1-BPTFP1-KPNA2P3	760	0.318527	1.92436
ARHGAP27P2	761	-0.16186	1.46408
ARHGAP28	762	0.420145	-2.56571
ARHGAP29	763	-2.27224	-4.30615
ARHGAP31	764	2.1967	0.178952
ARHGAP32	765	-0.47964	-1.81075
ARHGAP33	766	3.4692	-0.23841
ARHGAP35	767	0.682994	4.55874
ARHGAP36	768	4.25727	-0.180759
ARHGAP39	769	-1.22934	-0.653387
ARHGAP4	770	3.79115	2.5784
ARHGAP42	771	0.44643	1.18233
ARHGAP44	772	-3.18586	0.304512
ARHGAP45	773	0.750919	1.45123
ARHGAP5	774	0.524852	2.04275
ARHGAP5-AS1	775	5.81342	0.893733
ARHGAP6	776	5.12652	1.20291
ARHGAP9	777	-5.61792	-0.330733
ARHGDIA	778	4.20195	3.48902
ARHGDIB	779	-0.480182	0.134858
ARHGDIG	780	-0.331343	-3.43823
ARHGEF1	781	-0.905446	2.65735
ARHGEF10	782	-0.471765	4.95773
ARHGEF10L	783	0.386471	0.689463
ARHGEF11	784	-0.736192	-0.126218
ARHGEF12	785	1.12376	-1.97042
ARHGEF15	786	0.016082	1.62894
ARHGEF16	787	-3.07233	0.913818
ARHGEF17	788	-1.9598	-3.13627
ARHGEF18	789	-3.65936	-1.35962
ARHGEF19	790	3.24435	0.160702
ARHGEF2	791	-1.00901	-2.70156
ARHGEF25	792	-1.84918	-5.04718
ARHGEF26	793	4.3201	0.37467
ARHGEF26-AS1	794	3.85423	0.701565
ARHGEF28	795	2.35556	-2.16339
ARHGEF3	796	-1.34622	-3.97073
ARHGEF33	797	1.90746	1.98662
ARHGEF37	798	-0.828495	2.68154
ARHGEF4	799	-0.78427	-0.818896
ARHGEF40	800	2.53078	2.08043
ARHGEF6	801	0.872898	4.18946
ARHGEF7	802	-1.8706	-4.99028
ARHGEF9	803	1.05302	-2.81707
ARID1A	804	0.182561	2.74946
ARID1B	805	0.855072	2.54203
ARID2	806	-4.80073	-1.55258
ARID3A	807	-0.138036	0.087711
ARID3B	808	1.4942	2.57979
ARID4A	809	0.612697	-0.607612
ARID4B	810	-0.776794	-1.02849
ARID5A	811	-2.9223	-1.85037
ARID5B	812	-4.25114	-2.39738
ARIH1	813	-3.46029	-0.025092
ARIH2	814	-0.756245	0.13527
ARIH2OS	815	3.14695	2.1798
ARL1	816	-0.594629	1.84411
ARL10	817	3.18864	0.380646
ARL13B	818	-1.42514	3.55108
ARL14EP	819	0.85717	-3.68981
ARL15	820	3.8131	-1.36073
ARL16	821	4.75819	-0.094442
ARL17A	822	1.52082	0.903193
ARL17B	823	0.450074	1.48044
ARL2	824	-5.5052	-1.43072
ARL2BP	825	-4.09253	-1.26759
ARL3	826	1.35811	-1.53221
ARL4A	827	1.65195	-2.60902
ARL4C	828	-4.04221	-2.92185
ARL4D	829	-2.8454	-4.49018
ARL5A	830	0.158769	1.70247
ARL5B	831	-5.47971	-3.06016
ARL6	832	-0.194275	-1.23036
ARL6IP1	833	0.482612	-0.273213
ARL6IP4	834	-1.3961	0.013647
ARL6IP5	835	-3.33562	-2.73698
ARL6IP6	836	-0.061106	4.47613
ARL8A	837	0.827259	1.56222
ARL8B	838	-3.6435	-3.60698
ARL9	839	1.68931	-0.421288
ARMC1	840	-0.835906	0.722414
ARMC10	841	1.33813	-3.39029
ARMC2	842	1.44295	0.068601
ARMC5	843	-0.8803	2.86754
ARMC6	844	-1.71278	-4.20522
ARMC7	845	-0.763605	-2.12385
ARMC8	846	-6.00458	-2.48115
ARMC9	847	-0.547758	-0.891616
ARMCX1	848	2.25302	-2.77604
ARMCX2	849	1.32494	-2.0531
ARMCX3	850	-0.72539	-3.02908
ARMCX4	851	-2.81308	-0.669368
ARMCX5	852	0.762103	-3.05633
ARMCX6	853	-1.28146	1.2434
ARMT1	854	-3.7822	-2.86219
ARNT	855	-0.191342	-1.00977
ARNT2	856	-0.062986	-2.23008
ARNTL	857	-2.75704	-2.84962
ARNTL2	858	0.869214	-0.893247
ARPC1A	859	-0.678396	-3.94057
ARPC1B	860	-0.659202	0.728854
ARPC2	861	2.36003	-0.036854
ARPC3	862	1.75164	-0.136836
ARPC4	863	1.62138	-2.81827
ARPC5	864	3.09041	3.91084
ARPC5L	865	1.32826	1.52967
ARPIN	866	2.60347	5.03957
ARPP19	867	-0.50874	-2.46484
ARPP21	868	-2.68137	-3.11484
ARRB1	869	1.5706	1.96775
ARRB2	870	2.0277	-2.04026
ARRDC1	871	-0.245355	-3.76744
ARRDC1-AS1	872	-0.661057	0.021132
ARRDC2	873	-1.70613	1.96543
ARRDC3	874	-0.315202	2.62539
ARRDC4	875	-1.08847	3.94915
ARSA	876	-0.994547	1.77175
ARSB	877	0.218349	3.34888
ARSD	878	1.8991	1.59107
ARSE	879	-1.64864	1.14792
ARSF	880	1.55676	0.647306
ARSG	881	-1.36254	-3.53424
ARSJ	882	-0.694008	-4.5747
ARSK	883	-0.181925	-2.94137
ART3	884	-4.25611	-2.63022
ART5	885	0.545328	1.08616
ARTN	886	-0.840557	-4.6232
ARV1	887	-1.8243	-0.266165
ARVCF	888	2.64145	-0.385588
ARX	889	-0.212166	-0.617233
ASAH1	890	3.06936	2.98582
ASAH2	891	0.136368	1.48371
ASAH2B	892	0.232571	0.796281
ASAP1	893	-2.32818	-3.76841
ASAP1-IT1	894	-3.21952	-0.263837
ASAP1-IT2	895	-1.39383	-3.41544
ASAP2	896	-2.87344	-2.4658
ASAP3	897	1.49478	2.40783
ASB1	898	0.862106	0.330194
ASB10	899	0.927321	-0.234266
ASB13	900	-4.92201	-1.24142
ASB16	901	1.85725	3.65006
ASB16-AS1	902	1.58173	3.16756
ASB18	903	0.877344	4.87393
ASB2	904	-2.67446	-3.77586
ASB4	905	0.577468	2.79581
ASB5	906	2.36258	-2.61361
ASB6	907	-2.06527	-4.98278
ASB7	908	0.570609	-0.5833
ASB8	909	-0.092656	2.12878
ASCC1	910	2.90894	0.714763
ASCC2	911	-1.0471	2.22616
ASCC3	912	3.93204	2.6482
ASCL1	913	-0.665765	0.199065
ASCL2	914	4.0855	-0.179803
ASCL5	915	-0.023599	0.113856
ASF1A	916	-0.268089	4.06167
ASGR1	917	-4.08981	-3.65034
ASGR2	918	-3.00667	-4.62818
ASH1L	919	-1.95952	-2.27481
ASH1L-AS1	920	3.82593	-1.29158
ASH2L	921	0.727904	-3.73239
ASIC1	922	2.63648	4.58237
ASIC2	923	2.5344	1.32372
ASIC3	924	0.25344	4.05807
ASIC4	925	2.34053	-2.41637
ASIP	926	3.83056	3.39251
ASL	927	0.288092	-2.9259
ASMTL	928	-1.03937	-1.7776
ASMTL-AS1	929	-1.12583	-0.750281
ASNA1	930	-1.12272	-3.9844
ASNSD1	931	-2.45827	-1.54713
ASNSP1	932	-1.40401	-1.83413
ASPA	933	-0.662947	1.73752
ASPDH	934	-3.36173	0.406623
ASPH	935	1.3537	4.17681
ASPHD1	936	-1.69854	-1.15764
ASPHD2	937	2.16028	-1.98134
ASPRV1	938	-1.52428	1.03912
ASPSCR1	939	-3.22951	1.57958
ASRGL1	940	0.211757	2.0333
ASS1	941	1.4511	-1.69467
ASTE1	942	-4.35269	-0.768259
ASTL	943	2.41016	4.01071
ASTN1	944	2.23363	-2.398
ASTN2	945	-2.59418	-0.060925
ASXL1	946	-1.54609	-3.75794
ASXL2	947	-0.210615	0.630988
ASXL3	948	-0.403101	-4.05757
ATAD1	949	-0.224218	2.23086
ATAD2	950	-0.428605	-3.82079
ATAD2B	951	-0.491693	2.63924
ATAD3A	952	-0.735613	-3.86802
ATAD3B	953	-1.19085	-1.33747
ATAD3C	954	1.04331	1.38452
ATAD5	955	1.24749	-1.62025
ATAT1	956	1.09479	-2.92058
ATCAY	957	-1.18128	-4.32482
ATE1	958	0.298495	1.87291
ATF1	959	0.776788	0.05902
ATF2	960	-3.38743	-4.88
ATF3	961	0.0698	2.68613
ATF4	962	-5.06338	-1.39355
ATF5	963	3.52994	2.7007
ATF6	964	1.40402	0.370199
ATF6B	965	-1.40297	-1.28608
ATF7	966	1.00793	0.684221
ATF7IP	967	0.359299	5.09349
ATF7IP2	968	0.598164	-3.5372
ATG10	969	0.786298	-0.230453
ATG101	970	-2.0831	-4.98099
ATG12	971	1.49298	3.74483
ATG13	972	-4.16882	-0.464936
ATG14	973	-1.88222	0.404479
ATG16L1	974	-4.28122	-1.05034
ATG16L2	975	-0.082335	2.39609
ATG2A	976	-0.683593	-3.72904
ATG2B	977	-1.08549	-0.962972
ATG3	978	-2.02889	-0.439334
ATG4A	979	1.0184	3.09428
ATG4B	980	-2.61541	-3.63908
ATG4C	981	-0.799666	2.70735
ATG4D	982	-5.41744	-2.64821
ATG5	983	-3.73297	-5.27379
ATG7	984	-1.34295	-4.85629
ATG9A	985	-3.59142	-4.25621
ATIC	986	0.183825	-2.47164
ATL1	987	-0.584404	-3.26283
ATL2	988	-0.077607	-2.42546
ATL3	989	-0.398145	2.21577
ATM	990	-0.983719	3.17793
ATMIN	991	-2.21912	1.46394
ATN1	992	-0.956651	-2.3345
ATOH7	993	3.10063	-1.49639
ATOH8	994	-1.43956	1.93834
ATOX1	995	3.04606	-0.276588
ATP10A	996	-1.79742	0.339874
ATP10B	997	1.10033	5.16753
ATP10D	998	1.47875	4.34317
ATP11A	999	-1.81101	1.36263
ATP11B	1000	-1.37039	-0.12221
ATP11C	1001	-0.393832	3.90747
ATP13A1	1002	-2.65015	-2.71498
ATP13A2	1003	-1.9682	-3.84859
ATP13A3	1004	-2.99311	-1.31186
ATP13A4	1005	2.56435	3.02121
ATP1A1	1006	-4.10143	-3.48301
ATP1A2	1007	1.59241	4.09063
ATP1A3	1008	0.125686	2.63226
ATP1A4	1009	-6.1496	-1.27442
ATP1B1	1010	-5.68652	-1.84522
ATP1B2	1011	3.9687	2.22228
ATP1B3	1012	-2.00072	-2.17462
ATP23	1013	0.422878	-2.69637
ATP2A2	1014	-4.77922	-3.74069
ATP2B1	1015	-4.97323	-1.90234
ATP2B2	1016	-3.14946	0.112421
ATP2B2-IT2	1017	0.656202	1.42511
ATP2B3	1018	-1.83468	-1.44263
ATP2B4	1019	3.54632	-1.35203
ATP2C1	1020	2.63153	2.10417
ATP2C2	1021	1.77026	0.507783
ATP4A	1022	-6.01387	-2.81478
ATP5F1A	1023	-2.70403	-4.68387
ATP5F1B	1024	-5.72443	-2.44651
ATP5F1C	1025	1.2052	3.51672
ATP5F1D	1026	-3.65734	-2.01443
ATP5IF1	1027	1.31376	-0.91649
ATP5MC1	1028	2.03365	-1.17034
ATP5MC2	1029	-2.48949	-2.99833
ATP5MC3	1030	-2.90742	-4.14933
ATP5MD	1031	-1.85069	-1.76205
ATP5ME	1032	0.740415	2.50106
ATP5MF	1033	0.57402	-0.689348
ATP5MG	1034	1.29986	-2.38401
ATP5MPL	1035	-4.5555	-1.89394
ATP5PB	1036	0.93104	-0.935249
ATP5PD	1037	0.879597	3.04618
ATP5PF	1038	-1.58414	-3.38178
ATP5PO	1039	-1.46161	-1.42172
ATP5S	1040	-0.804281	4.68933
ATP6AP1	1041	-0.095259	-4.77163
ATP6AP1L	1042	-1.61732	1.86655
ATP6AP2	1043	0.799003	-0.221294
ATP6V0A1	1044	-2.461	-4.99581
ATP6V0A2	1045	-3.11692	0.19007
ATP6V0A4	1046	4.42412	1.32587
ATP6V0B	1047	-1.48154	-3.52575
ATP6V0C	1048	-0.840098	-4.86803
ATP6V0CP3	1049	0.216501	-4.04032
ATP6V0D1	1050	-0.167333	-3.69862
ATP6V0E1	1051	2.05619	2.12061
ATP6V0E2	1052	1.6927	-0.494166
ATP6V0E2-AS1	1053	3.95574	1.07897
ATP6V1A	1054	-0.618091	-5.4478
ATP6V1B2	1055	-0.17558	0.442533
ATP6V1C1	1056	0.667423	-2.57176
ATP6V1D	1057	2.04325	0.357593
ATP6V1E1	1058	-0.837596	-3.65664
ATP6V1E2	1059	-2.33753	-0.259401
ATP6V1F	1060	-0.293347	-3.53969
ATP6V1G1	1061	-1.00489	-2.72572
ATP6V1G2	1062	0.833783	-4.183
ATP6V1H	1063	2.25958	-0.967055
ATP7A	1064	-2.34457	-0.459987
ATP7B	1065	2.58401	0.237612
ATP8A1	1066	0.224707	0.931345
ATP8A2	1067	2.49973	-1.55919
ATP8B1	1068	-3.37557	-0.261795
ATP8B2	1069	-0.129832	0.143781
ATP8B3	1070	1.95817	2.71142
ATP8B5P	1071	1.70883	2.91641
ATP9A	1072	0.174565	-3.60313
ATP9B	1073	2.35131	-1.79292
ATPAF1	1074	0.718657	3.61019
ATPAF2	1075	-1.37749	1.31544
ATR	1076	0.875843	3.00846
ATRAID	1077	1.25678	3.78866
ATRIP	1078	0.679879	-0.002524
ATRN	1079	-1.75228	-4.88515
ATRNL1	1080	-4.76251	-3.34805
ATRX	1081	0.818223	2.33091
ATXN1	1082	-2.11318	-2.98346
ATXN10	1083	3.97953	-0.016628
ATXN1L	1084	1.83565	5.00765
ATXN2	1085	-4.362	-2.05163
ATXN2L	1086	-3.74985	-1.03163
ATXN3	1087	-1.87025	-1.92004
ATXN7	1088	-0.288393	1.42314
ATXN7L1	1089	-2.19925	-0.98449
ATXN7L2	1090	-0.375275	-0.664235
ATXN7L3	1091	-1.52565	-4.88239
ATXN7L3B	1092	-0.35661	-5.40532
AUH	1093	-3.22763	-3.8158
AUNIP	1094	1.12314	-0.827155
AUP1	1095	-0.972326	-4.8102
AURKA	1096	-3.08303	-3.98949
AURKAIP1	1097	-2.51028	-5.50981
AURKB	1098	0.589444	1.81561
AURKC	1099	-0.008064	3.1593
AUTS2	1100	1.54655	3.89011
AVEN	1101	-0.701087	3.20192
AVIL	1102	2.12648	2.06204
AVL9	1103	0.92965	0.963099
AVP	1104	1.6625	2.49865
AVPI1	1105	-6.84714	-1.8846
AVPR2	1106	0.658269	-0.319035
AXIN1	1107	1.17566	-0.290086
AXIN2	1108	0.562405	-4.68753
AXL	1109	2.59077	1.49801
AZGP1	1110	-1.98187	2.30818
AZI2	1111	-0.254284	2.48041
AZIN1	1112	2.7766	-1.064
AZIN1-AS1	1113	0.861969	1.09592
AZIN2	1114	-0.926541	-2.26481
B2M	1115	1.20334	4.84924
B3GALNT1	1116	3.98614	-1.77323
B3GALNT2	1117	0.136717	1.75422
B3GALT1	1118	-1.79553	-0.823782
B3GALT2	1119	-1.04921	-0.689049
B3GALT4	1120	-1.18426	-0.794997
B3GALT5-AS1	1121	2.35137	1.69887
B3GALT6	1122	1.26875	-0.379699
B3GAT1	1123	0.473682	-0.088252
B3GAT2	1124	1.58986	4.26191
B3GAT3	1125	-1.40329	-0.696084
B3GLCT	1126	0.541352	1.55181
B3GNT2	1127	0.370476	-2.02459
B3GNT4	1128	2.69748	-2.04947
B3GNT5	1129	0.920729	2.3248
B3GNT6	1130	1.3211	2.34591
B3GNT7	1131	-0.17622	2.53221
B3GNT8	1132	2.17616	3.03227
B3GNT9	1133	-1.27835	2.43039
B3GNTL1	1134	-0.165479	-4.41167
B4GALNT1	1135	-0.546073	-3.79701
B4GALNT4	1136	1.72548	-0.246416
B4GALT1	1137	3.20878	2.17274
B4GALT2	1138	3.41827	0.144626
B4GALT3	1139	2.64187	-2.66242
B4GALT4	1140	-1.39618	1.6133
B4GALT5	1141	-0.381278	-3.32704
B4GALT6	1142	-0.790555	-1.58529
B4GALT7	1143	-1.07226	-1.98051
B4GAT1	1144	1.81004	-3.8505
B9D1	1145	2.43176	-1.72405
B9D2	1146	-1.45764	-3.79703
BAALC	1147	-1.28178	-2.93895
BAALC-AS2	1148	-0.643986	-3.73195
BAAT	1149	-3.16725	-1.03478
BABAM1	1150	-0.13817	-3.3544
BABAM2	1151	1.61204	-2.801
BACE1	1152	-1.95131	0.988506
BACE2	1153	0.816708	1.77649
BACH1	1154	-1.07954	2.22729
BACH2	1155	-1.7314	-1.79281
BAD	1156	0.085278	-3.05481
BAG1	1157	-1.35005	-0.102797
BAG2	1158	0.190172	-1.69971
BAG3	1159	5.01186	3.44848
BAG4	1160	0.763174	-1.24289
BAG5	1161	-4.16773	-3.83112
BAG6	1162	-1.16776	-2.98237
BAHCC1	1163	0.49947	-0.864561
BAHD1	1164	-0.388245	-0.768777
BAIAP2	1165	2.3207	-1.35153
BAIAP2-AS1	1166	1.06038	0.371822
BAIAP2L2	1167	-2.05361	-4.26031
BAIAP3	1168	0.694724	-1.32689
BAK1	1169	-3.58831	-0.713264
BAMBI	1170	-0.413353	2.40763
BANF1	1171	1.463	4.01848
BANP	1172	-2.36244	-2.57299
BAP1	1173	-0.216272	-1.69495
BARD1	1174	1.12762	2.24095
BARX1	1175	0.909032	2.00798
BASP1	1176	-1.22086	-4.22546
BASP1-AS1	1177	-6.16224	-2.31801
BATF2	1178	0.170364	0.212391
BATF3	1179	1.4622	-1.5238
BAX	1180	1.43214	-1.89523
BAZ1A	1181	-0.477795	2.70424
BAZ1B	1182	-4.14473	-1.93718
BAZ2A	1183	-1.42699	1.56984
BAZ2B	1184	-0.099667	4.13303
BBC3	1185	1.22378	-4.52825
BBIP1	1186	-0.389168	4.40071
BBOF1	1187	-2.66711	1.66037
BBOX1	1188	4.29303	0.542876
BBS1	1189	-3.15037	-3.02278
BBS10	1190	-2.87628	-3.21847
BBS12	1191	-1.04097	-4.47312
BBS2	1192	-0.656587	1.25893
BBS4	1193	4.37789	3.73621
BBS5	1194	0.218977	0.667467
BBS7	1195	-1.73841	0.669902
BBS9	1196	-0.2938	3.3116
BBX	1197	-0.942147	3.59941
BCAM	1198	0.632915	2.24944
BCAN	1199	6.21435	1.11983
BCAP29	1200	-0.926116	0.980627
BCAP31	1201	-0.262191	-3.18675
BCAR1	1202	-0.189916	-1.05507
BCAR3	1203	-0.051038	-1.74309
BCAS1	1204	-0.542772	4.58598
BCAS2	1205	0.387893	-1.78481
BCAS3	1206	-1.47863	-5.7694
BCAS4	1207	-0.162765	-0.096147
BCAT1	1208	-3.05251	-1.35862
BCAT2	1209	-0.071482	0.882718
BCCIP	1210	3.05896	5.04796
BCDIN3D	1211	-1.29127	1.88448
BCHE	1212	4.1917	3.40652
BCKDHA	1213	-1.94692	-3.97975
BCKDHB	1214	2.53978	1.76052
BCKDK	1215	0.323022	-2.76276
BCL10	1216	-0.772562	0.790749
BCL11A	1217	-1.94195	-2.22986
BCL11B	1218	0.237401	2.00481
BCL2	1219	1.8654	-1.31336
BCL2A1	1220	4.18004	0.6841
BCL2L1	1221	0.179978	-3.50949
BCL2L10	1222	1.95629	3.54586
BCL2L11	1223	1.64435	4.88122
BCL2L12	1224	1.65783	4.11091
BCL2L13	1225	-0.405319	0.270382
BCL2L2	1226	-4.50669	-3.92063
BCL3	1227	-3.44098	-0.421254
BCL6	1228	-0.048972	3.54844
BCL6B	1229	-1.95896	0.558123
BCL7A	1230	-2.44079	-1.87159
BCL7B	1231	-0.583299	-2.86693
BCL7C	1232	2.14004	1.77791
BCL9	1233	1.17516	1.74115
BCL9L	1234	0.539875	-2.00297
BCLAF1	1235	-1.74908	-4.37363
BCLAF3	1236	2.60157	2.31663
BCO2	1237	-0.090426	3.04022
BCOR	1238	-0.730994	-0.393502
BCORL1	1239	0.617513	0.738631
BCORP1	1240	0.707903	3.14455
BCR	1241	5.49221	-0.168568
BCRP2	1242	4.48986	-0.412566
BCS1L	1243	3.44024	1.50394
BDH1	1244	-3.24953	-4.02392
BDH2	1245	0.486797	1.5532
BDKRB2	1246	2.62083	1.62303
BDNF	1247	2.05876	-2.60288
BDNF-AS	1248	0.001343	4.72937
BDP1	1249	-0.616681	1.381
BEAN1	1250	-1.59434	0.236944
BECN1	1251	-1.36794	-4.07906
BEGAIN	1252	3.06683	-1.29102
BEND3	1253	2.15451	0.45179
BEND5	1254	-2.82909	-4.9029
BEND6	1255	-3.15432	-0.146373
BEND7	1256	1.76361	3.05025
BEST1	1257	0.681809	3.93034
BEST2	1258	3.71415	4.27272
BEST3	1259	-0.268929	-2.88401
BEST4	1260	3.97605	2.13753
BET1	1261	-0.789945	-0.623408
BET1L	1262	0.340775	0.884603
BEX1	1263	1.87255	-3.1977
BEX2	1264	1.91224	-3.53726
BEX3	1265	0.47082	-3.68445
BEX4	1266	2.73925	0.786762
BEX5	1267	-3.24326	-3.1153
BFAR	1268	-1.66951	-3.87432
BFSP1	1269	2.38416	-1.30317
BGN	1270	-0.98007	4.21535
BHLHB9	1271	2.85168	0.194002
BHLHE22	1272	2.05002	0.842877
BHLHE23	1273	0.554978	3.00416
BHLHE40	1274	-4.72452	-1.6564
BHLHE41	1275	-3.01658	1.22159
BHMT2	1276	2.55731	0.323549
BICC1	1277	-2.07444	-5.33557
BICD1	1278	-1.80064	-1.41217
BICD2	1279	-3.18597	-0.68186
BICDL1	1280	0.37672	-2.83714
BICDL2	1281	-4.63227	-2.10601
BICRA	1282	1.11347	2.14209
BICRAL	1283	-4.53317	-1.96406
BID	1284	-3.08262	-0.025917
BIN1	1285	-0.214218	1.33422
BIN3	1286	-0.987967	-2.38654
BIN3-IT1	1287	0.584327	4.59786
BIRC2	1288	2.13021	3.88732
BIRC3	1289	5.00198	0.105213
BIRC6	1290	0.552446	2.88334
BIVM	1291	-3.08106	-1.63437
BLCAP	1292	2.31576	-2.93029
BLID	1293	0.299011	2.84172
BLM	1294	0.720442	-2.35526
BLMH	1295	-1.59825	-3.72283
BLNK	1296	3.78461	2.76823
BLOC1S1	1297	0.379179	3.00411
BLOC1S2	1298	0.658326	-2.29096
BLOC1S3	1299	-0.378677	-1.70509
BLOC1S4	1300	-1.16156	-3.72918
BLOC1S6	1301	-1.67841	0.733082
BLVRA	1302	-2.46176	-3.89825
BLVRB	1303	4.17218	1.36603
BLZF1	1304	-0.969174	2.7732
BMF	1305	1.62784	2.49092
BMP1	1306	-1.1284	0.922044
BMP10	1307	1.10866	4.18679
BMP2	1308	1.12356	4.16072
BMP2K	1309	5.85279	2.83228
BMP6	1310	-0.223222	2.26788
BMP7	1311	2.7016	2.66389
BMP8B	1312	-0.866807	2.76622
BMPER	1313	-1.45	-3.8977
BMPR1A	1314	0.71475	1.32653
BMPR1B	1315	3.56936	1.49083
BMPR2	1316	1.12674	-2.11817
BMS1	1317	-2.50457	-1.34669
BMS1P1	1318	-1.67101	-0.991293
BMS1P14	1319	0.266863	-0.985579
BMS1P2	1320	-2.35706	0.383354
BMS1P20	1321	0.040486	-1.1115
BMS1P4	1322	-1.61903	1.64976
BMT2	1323	-0.829353	-3.93886
BNIP1	1324	2.14158	3.71226
BNIP2	1325	0.890204	4.65322
BNIP3	1326	-3.40486	-4.15867
BNIP3L	1327	-1.7337	-3.31432
BNIPL	1328	-2.5905	-2.39906
BOD1	1329	1.68297	1.22628
BOD1L1	1330	-2.49313	-2.9049
BOD1L2	1331	0.649057	-2.8014
BOK	1332	0.129789	2.79026
BOLA1	1333	-0.349064	-1.6254
BOLA2-SMG1P6	1334	1.57279	0.584299
BOLA3	1335	-1.46299	-0.967152
BOLA3-AS1	1336	-0.9438	-1.39964
BOP1	1337	-0.989377	-4.22565
BORCS5	1338	-0.22177	-2.62646
BORCS6	1339	-1.50486	-2.51738
BORCS7	1340	4.86937	-0.416345
BORCS8	1341	-0.749067	-2.68417
BORCS8-MEF2B	1342	0.514756	4.06
BPGM	1343	1.07253	1.34012
BPHL	1344	4.71827	-0.135861
BPNT1	1345	3.9792	2.28402
BPTF	1346	1.76398	4.63648
BRAF	1347	-2.41848	-0.174569
BRAP	1348	-0.598267	2.97571
BRAT1	1349	1.86383	2.33899
BRCA1	1350	-2.29547	1.45788
BRCC3	1351	-0.073077	-5.0278
BRD1	1352	-0.541468	-0.573238
BRD2	1353	1.14129	3.29883
BRD3	1354	0.828775	-0.22737
BRD3OS	1355	-0.676407	-1.79374
BRD4	1356	2.28103	0.168503
BRD7	1357	3.62251	0.622833
BRD7P3	1358	3.55332	1.63267
BRD8	1359	-2.5192	-4.28813
BRD9	1360	-1.00935	-2.42567
BRF1	1361	-0.408755	1.47913
BRF2	1362	0.38339	-4.326
BRI3	1363	0.99614	0.699371
BRI3BP	1364	-1.19461	1.73826
BRICD5	1365	-4.09236	-1.82204
BRINP1	1366	-1.87578	-0.469794
BRINP2	1367	-1.11474	-0.847109
BRINP3	1368	1.0332	0.296281
BRIX1	1369	-1.85779	1.21967
BRK1	1370	0.675052	-3.38882
BRMS1	1371	1.6951	1.65989
BRMS1L	1372	3.05423	-1.96542
BROX	1373	0.617905	4.7407
BRPF1	1374	-1.93351	-2.29439
BRPF3	1375	-2.55077	-5.47669
BRSK1	1376	-2.54946	2.28012
BRSK2	1377	-1.97146	1.16518
BRWD1	1378	2.23039	-2.86954
BRWD3	1379	-0.757953	0.85778
BSCL2	1380	1.31081	3.94879
BSDC1	1381	-0.008123	0.705385
BSG	1382	-2.96323	-3.89122
BSN	1383	0.462358	-2.83499
BSND	1384	0.917232	3.86097
BSPRY	1385	2.2101	1.58095
BST2	1386	-1.79147	-0.451734
BTAF1	1387	0.100692	-1.11203
BTBD1	1388	-1.06006	-4.39376
BTBD10	1389	-0.020533	-4.65831
BTBD11	1390	-1.89416	-2.46148
BTBD16	1391	-0.512484	1.79764
BTBD17	1392	3.75863	1.52068
BTBD18	1393	1.82358	2.02194
BTBD2	1394	1.24889	-0.672536
BTBD3	1395	0.10009	2.44511
BTBD6	1396	-2.07824	-2.96158
BTBD7	1397	-2.75081	-1.8258
BTBD8	1398	-2.21747	2.8424
BTBD9	1399	2.18684	-1.46235
BTC	1400	2.63578	-0.737895
BTD	1401	-0.638403	1.87915
BTF3	1402	0.677099	3.555
BTF3L4	1403	1.14035	2.81576
BTF3P11	1404	-1.66782	-2.77385
BTG1	1405	2.54348	2.50397
BTG2	1406	-0.282199	4.45099
BTG3	1407	3.30496	3.18247
BTN2A1	1408	0.822729	1.71323
BTN2A2	1409	0.663839	3.91857
BTN2A3P	1410	2.42874	5.09361
BTN3A1	1411	1.83114	4.54081
BTN3A2	1412	1.75788	5.1657
BTN3A3	1413	-0.704561	0.031563
BTNL2	1414	-0.579895	0.510034
BTNL9	1415	1.86629	2.4853
BTRC	1416	-0.164406	-4.28106
BUB3	1417	-2.14779	-0.238777
BUD13	1418	-4.32364	-1.27348
BUD23	1419	-2.50729	-0.576214
BUD31	1420	-0.34045	0.423942
BVES	1421	-2.42066	1.28331
BYSL	1422	-0.062827	-3.23588
BZW1	1423	0.479082	3.25527
BZW2	1424	-0.513079	-1.78192
C10orf105	1425	3.90314	4.04266
C10orf143	1426	-2.13109	3.9476
C10orf82	1427	0.173162	-2.27463
C10orf88	1428	0.460802	0.965251
C10orf90	1429	-0.595811	3.94289
C10orf95	1430	-1.07563	1.25172
C10orf99	1431	1.02483	0.456469
C11orf1	1432	6.22894	2.7227
C11orf16	1433	0.954278	3.43635
C11orf21	1434	0.232634	0.6137
C11orf24	1435	-2.30849	0.8193
C11orf42	1436	1.40196	2.92384
C11orf49	1437	-2.36597	-5.43465
C11orf54	1438	-1.67107	1.62349
C11orf58	1439	0.654846	-1.72121
C11orf65	1440	2.5941	4.67634
C11orf68	1441	-4.9255	-3.9383
C11orf71	1442	1.12139	2.48323
C11orf72	1443	-0.875917	2.16581
C11orf74	1444	-1.63649	-3.79541
C11orf80	1445	1.64751	-2.28663
C11orf87	1446	-3.10765	-5.10654
C11orf94	1447	1.59958	4.42288
C11orf95	1448	1.87223	-3.13177
C11orf96	1449	0.891016	1.8784
C11orf97	1450	3.54135	-0.417081
C12orf10	1451	-3.41518	-1.1702
C12orf29	1452	-1.0724	-0.681353
C12orf4	1453	-1.32035	-0.63164
C12orf43	1454	-2.49877	-5.26977
C12orf45	1455	5.86509	0.361865
C12orf49	1456	-3.18155	-1.46646
C12orf54	1457	-3.11748	-2.61068
C12orf57	1458	-3.99929	-2.08637
C12orf60	1459	-0.246244	0.822173
C12orf65	1460	-0.275236	0.584756
C12orf66	1461	0.527226	3.80868
C12orf73	1462	3.92177	2.3307
C12orf75	1463	5.97405	3.31574
C12orf76	1464	-0.27181	-1.66238
C14orf119	1465	-1.45014	-1.57563
C14orf132	1466	1.46451	-1.59954
C14orf144	1467	1.18387	3.71035
C14orf177	1468	-0.930636	4.01851
C14orf28	1469	-1.23846	-3.5896
C14orf93	1470	-0.033409	3.98363
C15orf39	1471	-1.21403	0.547052
C15orf40	1472	3.96647	3.45586
C15orf41	1473	0.851946	1.69641
C15orf59	1474	0.656433	2.07781
C15orf61	1475	0.85072	-1.29105
C15orf62	1476	0.01556	4.35573
C15orf65	1477	0.414226	-1.3055
C16orf45	1478	-3.83955	-2.16532
C16orf58	1479	2.02922	-2.92574
C16orf70	1480	0.569996	-2.27661
C16orf72	1481	-4.5594	-0.96297
C16orf74	1482	6.88827	1.77675
C16orf86	1483	-1.93354	-1.72709
C16orf87	1484	-1.48442	-4.06725
C16orf89	1485	1.89031	0.836068
C16orf91	1486	-2.37253	-5.17149
C16orf92	1487	-0.250108	-0.492378
C16orf95	1488	-0.34524	-2.15142
C17orf100	1489	-4.90505	-2.33724
C17orf51	1490	1.6664	-1.67541
C17orf58	1491	-0.040839	-4.65615
C17orf67	1492	3.13025	-0.556464
C17orf75	1493	-2.7469	-2.15971
C17orf80	1494	1.46626	3.19531
C17orf97	1495	0.844603	1.95437
C18orf12	1496	2.82397	3.68135
C18orf21	1497	-1.77344	1.2315
C18orf25	1498	-4.31136	-0.47401
C18orf54	1499	-1.41591	1.0504
C19orf12	1500	2.40725	0.170353
C19orf18	1501	-0.035157	4.14861
C19orf24	1502	-0.206206	2.07374
C19orf25	1503	-2.40742	0.880256
C19orf33	1504	1.11269	3.24709
C19orf38	1505	0.702589	3.96236
C19orf44	1506	2.27467	5.05453
C19orf47	1507	-3.25117	-4.42487
C19orf48	1508	0.189052	2.4849
C19orf53	1509	-0.715476	1.88476
C19orf57	1510	0.983146	-1.36974
C19orf66	1511	-1.67359	-3.68458
C19orf70	1512	-0.598944	-1.73732
C19orf73	1513	-2.80854	-2.26447
C1D	1514	-0.113708	-3.93603
C1GALT1	1515	-0.507699	1.40397
C1GALT1C1	1516	0.560763	-1.392
C1QA	1517	1.52117	1.51406
C1QB	1518	2.53552	1.63288
C1QBP	1519	0.097256	2.14021
C1QC	1520	2.16869	2.44964
C1QL1	1521	5.55714	-0.26091
C1QL2	1522	-0.20572	-2.94235
C1QL3	1523	1.38252	-2.72065
C1QTNF12	1524	2.39338	0.649687
C1QTNF2	1525	2.48333	-2.1762
C1QTNF3	1526	2.70984	3.59837
C1QTNF4	1527	-1.00242	-0.683898
C1QTNF6	1528	-1.29023	0.73624
C1R	1529	2.22757	-2.86815
C1RL	1530	-4.98133	-2.36993
C1S	1531	0.340598	-3.93177
C1orf100	1532	-1.79156	-0.155461
C1orf109	1533	0.047397	-0.452569
C1orf112	1534	1.76586	3.36876
C1orf115	1535	-0.288839	-2.58923
C1orf122	1536	1.26734	0.835597
C1orf123	1537	-0.135929	-2.77027
C1orf131	1538	-0.162195	-3.89357
C1orf158	1539	1.13084	2.20423
C1orf159	1540	-1.61911	-1.90341
C1orf162	1541	-1.03271	2.59668
C1orf174	1542	-5.22612	-0.650592
C1orf189	1543	-0.018697	2.80945
C1orf194	1544	3.82217	0.765842
C1orf198	1545	-0.565386	3.08614
C1orf21	1546	2.29272	-0.007853
C1orf210	1547	0.508723	2.48628
C1orf216	1548	0.62032	-3.18174
C1orf220	1549	3.17797	1.15425
C1orf226	1550	3.5348	0.836821
C1orf229	1551	1.3983	1.76958
C1orf35	1552	-2.44254	-3.50811
C1orf43	1553	-0.367128	-4.29162
C1orf50	1554	3.72475	0.375836
C1orf52	1555	3.11936	1.77357
C1orf53	1556	2.25911	-0.026623
C1orf54	1557	3.39371	1.55201
C1orf56	1558	0.276436	2.18801
C1orf61	1559	5.73163	1.05041
C1orf74	1560	-0.776912	-4.40682
C1orf94	1561	2.02219	3.40782
C2	1562	-0.751667	1.15768
C20orf141	1563	1.6523	3.80781
C20orf144	1564	1.47965	2.80449
C20orf194	1565	1.03518	3.68038
C20orf196	1566	-2.56821	-3.28535
C20orf204	1567	1.88901	3.98066
C20orf27	1568	1.11476	-1.7331
C20orf96	1569	1.07128	4.26044
C21orf2	1570	0.99931	-1.96433
C21orf33	1571	-3.07882	-1.69998
C21orf58	1572	0.765939	2.57844
C21orf62-AS1	1573	0.067296	2.51699
C21orf91	1574	-1.19294	2.54069
C22orf15	1575	1.71874	3.84637
C22orf23	1576	7.22373	0.445524
C22orf39	1577	2.99295	-1.10692
C22orf46	1578	-1.6984	2.76595
C2CD2	1579	-2.35279	-4.15365
C2CD2L	1580	1.44785	-1.93017
C2CD3	1581	-2.59717	-1.15995
C2CD4A	1582	2.05241	3.49845
C2CD4B	1583	1.38574	0.775195
C2CD4C	1584	1.20784	-1.65424
C2CD4D	1585	-1.25713	-0.765032
C2CD5	1586	-1.67193	-4.39567
C2CD6	1587	2.26971	3.20138
C2orf15	1588	1.78108	-1.55277
C2orf27A	1589	-1.70628	-4.3136
C2orf40	1590	-0.047772	-1.17366
C2orf42	1591	-3.11207	-2.38352
C2orf49	1592	-0.704108	2.48785
C2orf50	1593	0.163778	-2.13911
C2orf54	1594	-0.823005	0.105755
C2orf68	1595	0.305284	2.32101
C2orf69	1596	2.52552	-1.32018
C2orf70	1597	3.26448	5.15861
C2orf72	1598	-0.869793	-1.43414
C2orf73	1599	3.84627	1.05412
C2orf74	1600	-0.06266	0.365461
C2orf76	1601	1.19707	0.065136
C2orf80	1602	0.627423	-1.62611
C2orf81	1603	0.690234	-1.35069
C2orf88	1604	0.226491	3.57572
C2orf92	1605	-2.00758	0.663954
C3	1606	2.0869	2.30815
C3AR1	1607	3.22505	4.50447
C3orf14	1608	1.86327	-0.944402
C3orf18	1609	-4.14806	-2.71405
C3orf22	1610	1.13088	2.91951
C3orf33	1611	1.4888	-0.162272
C3orf35	1612	-3.18069	-1.39338
C3orf38	1613	1.12232	2.90732
C3orf58	1614	-3.86316	-2.70505
C3orf62	1615	1.69586	-3.25218
C3orf67	1616	-0.92494	0.694118
C3orf70	1617	3.88574	1.59197
C3orf80	1618	-2.31399	-5.29878
C4BPB	1619	0.977539	2.35193
C4orf19	1620	0.846232	-1.49177
C4orf3	1621	-0.536352	2.51419
C4orf33	1622	-1.03726	1.56335
C4orf47	1623	0.516769	-2.01729
C4orf48	1624	-1.10793	1.76503
C5	1625	1.64044	-0.215404
C5AR2	1626	1.75121	2.77215
C5orf15	1627	-0.443232	2.23625
C5orf22	1628	1.0343	1.39717
C5orf24	1629	-0.420009	1.61972
C5orf30	1630	-1.32857	-4.51945
C5orf42	1631	1.10072	-3.71513
C5orf49	1632	3.80062	-0.038372
C5orf51	1633	-2.55052	-1.98301
C5orf56	1634	0.938286	3.72681
C5orf58	1635	0.059482	3.02775
C6orf106	1636	-4.08388	-2.76563
C6orf118	1637	5.84095	2.3351
C6orf120	1638	-2.62611	-2.74636
C6orf136	1639	-4.28028	-3.86367
C6orf15	1640	-0.271757	1.64168
C6orf201	1641	0.47708	-1.06463
C6orf203	1642	-1.29222	-3.03482
C6orf226	1643	-0.24436	-2.76589
C6orf47	1644	-2.50911	1.76223
C6orf48	1645	0.800819	2.37606
C6orf52	1646	4.6849	0.852492
C6orf62	1647	-1.00011	-1.38692
C6orf89	1648	0.632057	3.75153
C6orf99	1649	1.37541	3.48386
C7	1650	0.838861	0.778532
C7orf13	1651	0.487299	3.5308
C7orf25	1652	0.790119	-0.865826
C7orf26	1653	-4.47098	-2.9111
C7orf43	1654	1.05447	2.45783
C7orf50	1655	0.488565	-1.32952
C7orf57	1656	0.315877	0.438365
C7orf61	1657	-0.619652	3.55143
C8G	1658	1.47913	-3.31601
C8orf31	1659	-3.59212	0.884657
C8orf33	1660	0.373697	0.94055
C8orf34	1661	3.57185	1.70431
C8orf37	1662	-0.936741	-1.1907
C8orf44	1663	1.89257	-0.357369
C8orf46	1664	-0.376169	-2.92393
C8orf58	1665	2.82119	0.971849
C8orf59	1666	-0.398189	0.004433
C8orf74	1667	-0.088119	1.36237
C8orf76	1668	-0.68506	0.55829
C8orf82	1669	-0.092035	4.00207
C9orf106	1670	1.06856	3.41616
C9orf116	1671	1.07723	0.607705
C9orf129	1672	-2.01257	-4.29318
C9orf131	1673	-0.096087	1.75984
C9orf139	1674	-0.108937	3.18175
C9orf147	1675	-0.765673	2.00285
C9orf16	1676	1.58506	0.34902
C9orf163	1677	1.58526	1.84514
C9orf24	1678	-1.81607	-4.06088
C9orf3	1679	-2.4711	1.19382
C9orf40	1680	-1.43051	-4.47991
C9orf50	1681	1.15685	0.731846
C9orf62	1682	1.27585	0.536239
C9orf64	1683	-0.405347	3.21493
C9orf72	1684	-1.41272	-3.40066
C9orf78	1685	4.31262	4.57068
C9orf85	1686	-0.54192	4.33896
CA10	1687	-0.742273	-3.56823
CA11	1688	1.19109	-2.66141
CA12	1689	2.91605	4.17352
CA13	1690	-3.57416	-1.93523
CA14	1691	-1.22096	1.72992
CA2	1692	-0.447696	3.66126
CA4	1693	-1.48834	-4.42148
CA5A	1694	-0.003946	0.989885
CA5B	1695	3.47948	2.13528
CA5BP1	1696	-1.46677	-2.48649
CA7	1697	-4.4605	-2.55622
CA8	1698	3.11924	1.58096
CAAP1	1699	0.312738	3.99272
CAB39	1700	-2.3548	-1.89341
CAB39L	1701	-1.62724	-2.36588
CABCOCO1	1702	4.32532	2.78571
CABIN1	1703	1.52175	-2.58716
CABLES1	1704	2.23652	1.87018
CABLES2	1705	-5.73527	-2.57064
CABP1	1706	-6.59906	-2.57814
CABP2	1707	1.23292	-1.52612
CABP4	1708	0.206612	4.29041
CABP5	1709	0.028858	2.04086
CABP7	1710	3.87102	3.52522
CABYR	1711	-0.09812	-2.55207
CACFD1	1712	3.53352	4.29548
CACHD1	1713	6.51314	2.14943
CACNA1A	1714	-2.37185	-1.88511
CACNA1B	1715	-0.075144	-2.71242
CACNA1C	1716	-2.06095	-1.95276
CACNA1D	1717	-2.25779	-3.31435
CACNA1E	1718	2.70469	2.69585
CACNA1F	1719	0.574701	-1.82731
CACNA1G	1720	-2.36213	-2.64876
CACNA1H	1721	5.418	0.670367
CACNA1I	1722	-2.19692	-0.22733
CACNA2D1	1723	1.82651	-0.565138
CACNA2D2	1724	-3.90521	-1.62629
CACNA2D3	1725	-4.09821	-4.64105
CACNB1	1726	-2.01957	-3.52129
CACNB2	1727	-1.413	-5.24765
CACNB3	1728	0.779253	-2.8407
CACNB4	1729	-3.69324	-0.109934
CACNG1	1730	1.58877	4.46494
CACNG2	1731	-6.40006	-2.03851
CACNG3	1732	0.001687	-1.77811
CACNG4	1733	4.06182	2.47066
CACNG6	1734	-2.30465	-2.60212
CACNG7	1735	-0.078245	-0.09662
CACNG8	1736	-2.89938	-2.09534
CACTIN	1737	0.547438	2.97135
CACUL1	1738	2.75568	0.192973
CACYBP	1739	1.29564	3.10872
CAD	1740	-3.15096	-2.99761
CADM1	1741	4.94105	1.07727
CADM2	1742	0.128742	-2.33189
CADM3	1743	2.38833	-1.1796
CADM4	1744	-2.07085	3.26959
CADPS	1745	0.427446	1.50623
CADPS2	1746	-5.88279	-1.29402
CALB1	1747	2.3453	-2.67787
CALB2	1748	5.38452	0.00609
CALCA	1749	1.289	3.67932
CALCOCO1	1750	-2.0269	-2.5969
CALCOCO2	1751	1.23707	4.33095
CALCRL	1752	1.01225	-2.87607
CALD1	1753	1.28768	1.85355
CALHM1	1754	-1.96598	-4.20658
CALHM2	1755	-0.576572	-3.96643
CALHM6	1756	4.54336	1.08708
CALM1	1757	0.717185	-2.81792
CALM2	1758	-2.2268	-3.20762
CALM3	1759	-0.16207	-5.01978
CALML3	1760	2.88634	-0.724995
CALML4	1761	0.854876	0.27934
CALML6	1762	-2.32984	1.02767
CALN1	1763	2.88285	3.93354
CALR	1764	-0.393392	0.809794
CALU	1765	3.11414	0.932263
CALY	1766	-1.69834	-4.19341
CAMK1	1767	0.216538	-3.36227
CAMK1D	1768	-2.06698	-2.88168
CAMK1G	1769	-2.08618	-4.70153
CAMK2A	1770	-1.59834	-3.52451
CAMK2B	1771	-1.33728	-2.27396
CAMK2D	1772	3.23419	-0.33303
CAMK2G	1773	-3.67807	-2.53388
CAMK2N1	1774	0.714566	-2.55491
CAMK2N2	1775	1.45913	-0.117232
CAMK4	1776	0.072391	-2.31492
CAMKK1	1777	-2.56075	-4.19693
CAMKK2	1778	-6.12826	-2.62788
CAMKMT	1779	1.09003	3.54344
CAMKV	1780	3.54184	0.648547
CAMLG	1781	1.35875	-1.86858
CAMSAP1	1782	2.20301	-2.68864
CAMSAP2	1783	-0.349356	-4.50582
CAMSAP3	1784	-0.347095	-3.13709
CAMTA1	1785	-3.97705	-2.90724
CAMTA2	1786	-1.09722	-2.46985
CAND1	1787	-0.294737	0.151562
CAND2	1788	-1.35216	-4.10689
CANT1	1789	0.462259	4.04182
CANX	1790	3.80669	-0.928466
CAP1	1791	3.41486	1.23409
CAP2	1792	0.907197	-0.316942
CAPG	1793	5.67787	2.88069
CAPN1	1794	-1.59481	-3.5063
CAPN10	1795	1.89057	-1.43756
CAPN12	1796	1.32143	0.144381
CAPN13	1797	-0.017851	1.95935
CAPN15	1798	-0.651251	1.82366
CAPN2	1799	2.0705	5.01621
CAPN3	1800	-0.798037	2.35185
CAPN5	1801	1.46186	-4.69193
CAPN7	1802	0.29084	1.86953
CAPNS1	1803	-1.13645	-4.1574
CAPNS2	1804	-0.394773	-3.22765
CAPRIN1	1805	1.00966	-3.85429
CAPRIN2	1806	2.05539	2.71579
CAPS	1807	2.67394	3.81851
CAPS2	1808	-3.68996	-4.61648
CAPZA1	1809	-1.03851	-2.49682
CAPZA2	1810	-0.694447	-1.04842
CAPZB	1811	4.72235	1.70173
CARD10	1812	0.332369	3.07829
CARD14	1813	0.065918	3.25817
CARD16	1814	1.85345	0.912886
CARD17	1815	5.11973	0.350089
CARD19	1816	-4.12321	-0.470182
CARD6	1817	2.44961	4.44909
CARD8	1818	1.66176	5.49803
CARD9	1819	-0.592626	2.08184
CARF	1820	0.088744	4.55378
CARHSP1	1821	1.41659	1.76291
CARM1	1822	0.487441	1.60006
CARMIL1	1823	1.33581	-1.82398
CARMIL2	1824	-0.99351	-3.56519
CARMIL3	1825	4.54271	0.874246
CARMN	1826	0.853914	4.33717
CARNMT1	1827	-0.777369	-3.57276
CARNS1	1828	-1.00683	1.18541
CARS	1829	-1.81512	-2.33706
CARS2	1830	-0.068629	-1.30526
CARTPT	1831	-1.5929	-2.73921
CASC1	1832	-4.12891	-3.8306
CASC10	1833	-0.027703	-1.36321
CASC15	1834	-2.31896	-3.14223
CASC2	1835	0.65684	3.91906
CASC3	1836	-1.13773	0.523011
CASC4	1837	4.20568	2.13325
CASD1	1838	2.07841	1.60125
CASK	1839	4.18901	2.54693
CASKIN1	1840	1.687	2.63008
CASKIN2	1841	1.3283	3.94659
CASP1	1842	5.26204	1.30467
CASP10	1843	1.99692	4.66506
CASP16P	1844	0.838965	2.92043
CASP2	1845	0.587803	2.68252
CASP3	1846	-2.86228	-0.538386
CASP4	1847	0.054885	3.82821
CASP5	1848	2.09737	-0.910855
CASP6	1849	1.72856	0.388124
CASP7	1850	0.449014	-0.148825
CASP8	1851	2.25076	4.29037
CASP8AP2	1852	-4.14179	-1.29012
CASP9	1853	2.19788	3.02511
CASQ1	1854	-2.1021	-5.08709
CAST	1855	-4.10593	-0.069012
CASTOR1	1856	5.90029	1.01413
CASTOR2	1857	0.675657	2.1082
CASZ1	1858	1.06209	1.69559
CAT	1859	0.282418	4.48412
CATSPER2P1	1860	2.22474	0.166092
CATSPERE	1861	0.112246	0.777976
CAV1	1862	1.83422	0.764302
CAV2	1863	2.64644	1.10737
CAVIN1	1864	-1.80896	2.45591
CAVIN2	1865	-0.874924	-0.266241
CAVIN3	1866	2.65244	2.90705
CAVIN4	1867	-3.44679	0.600601
CBFA2T2	1868	-0.242975	-2.05729
CBFA2T3	1869	1.4662	-1.14608
CBFB	1870	2.72973	2.97872
CBL	1871	2.29444	0.894173
CBLB	1872	1.28259	0.890799
CBLL1	1873	0.981239	-3.31973
CBLN1	1874	2.33264	-2.91329
CBLN2	1875	-2.83604	-3.43434
CBLN4	1876	-1.86179	-1.85996
CBR1	1877	-0.106673	1.1924
CBR3	1878	2.16774	-2.36538
CBR3-AS1	1879	0.106397	-0.825039
CBR4	1880	-0.98985	2.21065
CBWD1	1881	-0.98921	1.80842
CBWD5	1882	-1.74969	0.421816
CBX1	1883	2.96696	5.01491
CBX2	1884	0.040543	1.65674
CBX3	1885	-1.95512	0.279654
CBX4	1886	0.350118	-3.35763
CBX5	1887	1.99873	5.62435
CBX6	1888	2.17995	-1.2062
CBX7	1889	-2.60774	-3.14634
CBY1	1890	-0.141312	-2.47586
CC2D1A	1891	-0.058869	-2.65138
CC2D1B	1892	-1.42088	1.4954
CC2D2A	1893	2.45096	3.47146
CC2D2B	1894	6.48389	2.10869
CCAR1	1895	-2.07999	-1.0825
CCAR2	1896	0.275919	-0.6696
CCBE1	1897	4.40162	-0.679439
CCDC102A	1898	4.3064	0.542517
CCDC102B	1899	-1.15366	0.21109
CCDC103	1900	2.62204	-0.874449
CCDC106	1901	0.82576	-2.49809
CCDC107	1902	-0.87899	-2.44756
CCDC110	1903	-1.81841	-4.52754
CCDC112	1904	2.39745	2.77488
CCDC113	1905	0.431518	-0.731956
CCDC114	1906	-2.12994	2.42558
CCDC115	1907	-4.83125	-2.69034
CCDC117	1908	1.07626	-4.18639
CCDC12	1909	-3.07491	-3.54932
CCDC120	1910	2.1059	-0.111033
CCDC121	1911	-1.37857	1.97171
CCDC122	1912	-1.0996	3.4245
CCDC124	1913	-1.7916	-4.32992
CCDC125	1914	-0.608052	4.28617
CCDC126	1915	-1.12054	-2.64316
CCDC127	1916	0.844139	3.03557
CCDC130	1917	-2.87085	-0.620252
CCDC134	1918	1.31171	3.10806
CCDC136	1919	-0.74918	2.64533
CCDC137	1920	-0.547703	2.46321
CCDC138	1921	-1.09756	0.333718
CCDC14	1922	-1.92112	-2.23412
CCDC141	1923	-0.024854	2.894
CCDC142	1924	0.262711	2.76568
CCDC144B	1925	0.139523	0.456359
CCDC144CP	1926	-1.24581	1.28385
CCDC144NL	1927	1.02642	1.97745
CCDC146	1928	-1.36392	0.963012
CCDC148	1929	5.56188	0.735227
CCDC149	1930	-2.04833	-3.19934
CCDC15	1931	0.030238	5.07949
CCDC151	1932	-1.77868	1.25351
CCDC152	1933	1.37593	3.27508
CCDC153	1934	4.35771	1.2589
CCDC154	1935	-1.08733	2.06789
CCDC157	1936	-0.460511	2.84393
CCDC158	1937	-1.34588	-2.13249
CCDC159	1938	0.11412	4.65221
CCDC160	1939	-0.737065	2.27568
CCDC166	1940	-1.10183	2.32208
CCDC167	1941	0.169649	0.642365
CCDC170	1942	1.59212	2.07712
CCDC171	1943	3.30202	3.33275
CCDC173	1944	-0.407654	2.46716
CCDC174	1945	-0.030385	3.61678
CCDC177	1946	-2.8113	-1.73714
CCDC18-AS1	1947	-0.686867	4.11816
CCDC181	1948	-0.154937	2.01254
CCDC184	1949	-3.53068	-0.795807
CCDC186	1950	-3.04828	-0.149077
CCDC189	1951	2.76907	-0.80276
CCDC191	1952	3.96989	5.16914
CCDC22	1953	-2.04817	-3.3217
CCDC24	1954	1.14351	-3.04632
CCDC25	1955	-3.93012	-2.77468
CCDC28A	1956	3.61287	-1.6713
CCDC28B	1957	0.103179	-1.45182
CCDC3	1958	-1.17874	-3.75454
CCDC30	1959	-1.7625	-3.1579
CCDC32	1960	2.51419	-2.24026
CCDC34	1961	-0.778426	-2.87866
CCDC39	1962	-4.0721	-0.48468
CCDC40	1963	1.11272	3.62977
CCDC43	1964	-0.565039	0.619404
CCDC47	1965	-3.00163	-1.64582
CCDC50	1966	0.784321	5.05125
CCDC51	1967	-3.05407	-4.13209
CCDC57	1968	-0.375029	-1.28209
CCDC58	1969	-2.9818	1.20683
CCDC59	1970	0.98708	2.75256
CCDC6	1971	2.07881	-1.78417
CCDC61	1972	1.14821	4.82553
CCDC65	1973	1.7139	3.77567
CCDC66	1974	-0.000413	2.7075
CCDC68	1975	-1.04759	-3.45402
CCDC69	1976	0.427654	2.52428
CCDC7	1977	-0.896084	4.15129
CCDC70	1978	0.50023	4.44663
CCDC71	1979	0.987353	3.54422
CCDC71L	1980	1.73258	-1.22726
CCDC74B	1981	0.847626	0.370433
CCDC77	1982	2.90991	4.4652
CCDC78	1983	-3.81468	0.936546
CCDC8	1984	5.50335	2.20865
CCDC80	1985	-0.628428	1.84127
CCDC82	1986	-3.12337	-2.84464
CCDC84	1987	-1.19998	0.210525
CCDC85A	1988	-1.83293	-4.80785
CCDC85B	1989	-0.547652	3.21231
CCDC85C	1990	4.35445	2.75917
CCDC86	1991	3.4599	4.25735
CCDC87	1992	-2.4277	-1.66431
CCDC88A	1993	-0.687384	3.44478
CCDC88B	1994	1.70189	2.1524
CCDC88C	1995	2.20631	-0.442532
CCDC9	1996	-3.30121	-4.88475
CCDC90B	1997	5.37421	0.75509
CCDC91	1998	-0.060899	2.6475
[truncated: 13,635 more rows]
