# Supplementary material for: Population clustering of structural brain aging and its association with brain development
Source: eLife. 2024 Oct 18;13:RP94970. doi: 10.7554/eLife.94970 (PMC11488854; doi:10.7554/eLife.94970)
Supplement: Figure 8—source data 2. — Functional enrichment of gene transcripts significantly associated with delayed brain development and accelerated brain aging. Gene set enrichment for genes spatially positively correlated with the first PLS component in IMAGEN and negatively correlated with the first PLS component in UKB. [file elife-94970-fig8-data2.xlsx]

## Sheet: Sheet1
Fig.8 Functional enrichment of gene transcripts significantly associated with delayed brain development and accelerated brain aging.
Gene set enrichment for genes spatially positively correlated with the first PLS component in IMAGEN
Description	GeneRatio	BgRatio	Pvalue	P.adjust
GO : regulation of trans-synaptic signaling	42/797	449/18903	1.24255e-06	0.00317764
GO : multicellular organismal response to stress	15/797	81/18903	1.25773e-06	0.00317764
GO : forebrain development	37/797	383/18903	2.51659e-06	0.00364222
GO : modulation of chemical synaptic transmission	41/797	448/18903	2.88321e-06	0.00364222
GO : regulation of membrane potential	39/797	431/18903	6.56424e-06	0.00663382
GO : signal release	40/797	470/18903	2.11824e-05	0.0178391
GO : penile erection	5/797	11/18903	4.91648e-05	0.0354899
GO : response to alkaloid	14/797	99/18903	6.8262e-05	0.043116
GO : regulation of cell shape	18/797	154/18903	8.87139e-05	0.048863
GO : learning or memory	26/797	273/18903	9.67009e-05	0.048863
KEGG : Circadian entrainment	15/405	97/8779	3.38097e-05	0.0107177
KEGG : Proteoglycans in cancer	21/405	203/8779	0.000429321	0.0456568
KEGG : PPAR signaling pathway	11/405	75/8779	0.000598637	0.0456568
KEGG : cAMP signaling pathway	22/405	225/8779	0.000686514	0.0456568
KEGG : Hepatocellular carcinoma	18/405	168/8779	0.000720139	0.0456568
Gene set enrichment for genes spatially negetively correlated with the first PLS component in UKB
Description	GeneRatio	BgRatio	Pvalue	P.adjust
GO : macroautophagy	76/2000	317/18903	4.79622e-12	2.71178e-08
GO : regulation of macroautophagy	45/2000	160/18903	5.03223e-10	1.42261e-06
GO : mitochondrial membrane organization	37/2000	120/18903	1.05492e-09	1.98818e-06
GO : establishment of protein localization to organelle	87/2000	449/18903	1.53171e-08	2.16507e-05
KEGG : Huntington disease	70/923	306/8779	1.44179e-10	4.77233e-08
KEGG : Pathways of neurodegeneration - multiple diseases	93/923	476/8779	1.18926e-09	1.96822e-07
KEGG : Spinocerebellar ataxia	40/923	143/8779	3.67094e-09	4.05027e-07
KEGG : Alzheimer disease	74/923	384/8779	1.1849e-07	8.93228e-06
KEGG : Autophagy - animal	41/923	167/8779	1.34929e-07	8.93228e-06
KEGG : Dopaminergic synapse	34/923	132/8779	4.77725e-07	2.63545e-05
KEGG : Prion disease	55/923	272/8779	1.11159e-06	5.25622e-05
KEGG : Amyotrophic lateral sclerosis	68/923	364/8779	1.28481e-06	5.31592e-05
